# Supplementary material for: Metal-free and enantioselective synthesis of 1,4-benzoxazepines frompara-quinone methide derivatives and α-bromohydroxamates
Source: Royal Society of Chemistry journal article supplement (doi:10.1039/d3cc02368k), 2023-01-01
Supplement: d3cc02368k1.pdf [file d3cc02368k1.pdf]

# Metal-free and enantioselective synthesis of 1,4-benzoxazepines from *para*-quinone methides derivatives and $\alpha$ -bromohydroxamates

Suo-Suo Qi,<sup>a</sup> Xin Luo,<sup>a</sup> Xiao-Ping Sun,<sup>a</sup> Jing-Jing Zhai,<sup>a</sup> Ming-Ming Chu,<sup>\*b</sup> Jin Chen,<sup>\*c</sup> Yi-Feng Wang,<sup>\*a</sup> and Dan-Qian Xu,<sup>\*a</sup>

<sup>a</sup> Catalytic Hydrogenation Research Center, State Key Laboratory Breeding Base of Green Chemistry-Synthesis Technology, Key Laboratory of Green Pesticides and Cleaner Production Technology of Zhejiang Province, Department of Green Chemistry and Technology, Zhejiang University of Technology, Hangzhou 310014, China. E-mail: [wangyifeng@zjut.edu.cn](mailto:wangyifeng@zjut.edu.cn), [chrc@zjut.edu.cn](mailto:chrc@zjut.edu.cn).

<sup>b</sup> College of Biological, Chemical Sciences and Engineering, Jiaying University, Jiaying 314001, P. R. China. E-mail: [chumingming@zjxu.edu.cn](mailto:chumingming@zjxu.edu.cn).

<sup>c</sup> Institute of Chemistry Co. Ltd., Henan Academy of Sciences, Zhengzhou 450002, Henan Province, P. R. of China. E-mail: [chenjin715@163.com](mailto:chenjin715@163.com).

## List of Contents

|                                                                       |     |
|-----------------------------------------------------------------------|-----|
| 1. General information.....                                           | S2  |
| 2. Experimental procedures and characterization data of products..... | S2  |
| 3. Scale-up experiment.....                                           | S10 |
| 4. Synthetic transformations of products.....                         | S10 |
| 5. HPLC spectra of products.....                                      | S11 |
| 6. NMR spectra of products.....                                       | S25 |
| 7. Crystal data and structure refinement for enantiopure 4i.....      | S50 |

## 1. General information

All the starting materials were obtained from commercial sources and used without further purification unless otherwise stated.  $^1\text{H}$  NMR spectra were recorded on Bruker AVANCE III (500 MHz) or Bruker ASCEND (600 MHz) in  $\text{CDCl}_3$  using residual solvent signals as the internal standard ( $\text{CDCl}_3$   $\delta = 7.26$  ppm).  $^{13}\text{C}$  NMR spectra were recorded at 126 MHz (Bruker AVANCE III) or 151 MHz (Bruker ASCEND) in  $\text{CDCl}_3$  using solvent signals as the internal standard ( $\text{CDCl}_3$   $\delta = 77.16$  ppm). HRMS data were measured on an Agilent 6120 LC/TOF-MS with ESI source. Melting points (m.p.) were obtained using a Büchi B-545 apparatus and uncorrected. Chiral HPLC analyses were performed using Agilent 1260 chromatography. Chiralpak IB, IC, ID, AD and IF columns were purchased from Daicel Chemical Industries (Shanghai, China). Optical rotations were measured on a Rudolph Autopol IV polarimeter. Column chromatography and flash chromatography experiments were conducted using silica gel GF254 (200-300 mesh) eluting with ethyl acetate and petroleum ether. TLC experiments were carried out on glass-backed silica plates. The *ortho*-hydroxyphenyl-substituted *p*-QMs<sup>1</sup> and  $\alpha$ -bromohydroxamates<sup>2</sup> were prepared according to the reported literature procedures.

[1] (a) Zhao, K.; Zhi, Y.; Shu, T.; Valkonen, A.; Rissanen, K.; Enders, D. *Angew. Chem. Int. Ed.* **2016**, 55, 12104. (b) Zhang, L.; Zhou, X.; Li, P.; Liu, Z.; Liu, Y.; Sun, Y.; Li, W. *RSC Adv.* **2017**, 7, 39216.

[2] (a) 1. Singh, R.; Nagesh, K.; Yugandhar, D.; Prasanthi, A. V. G. *Org. Lett.* **2018**, 20, 4848. (b) Zhou, S.-J.; Cheng, X.; Hu, C.-X.; Xu, G.-Y.; Xiao, W.-J.; Xuan, J. *Sci. China. Chem.* **2021**, 64, 61-65.

## 2. Experimental procedures and characterization data of products

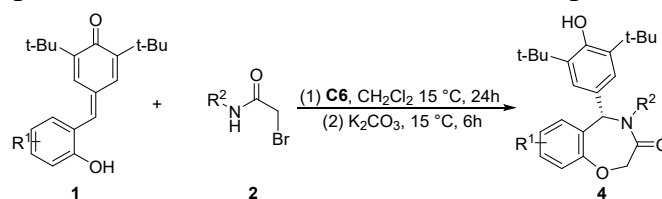

A flame-dried Schlenk-tube equipped with a magnetic stir bar was charged with **C6** (0.05 mmol, 10 mol%), **1** (0.1 mmol), **2** (1.2 equiv., 0.12 mmol) in 1.5 mL DCM. The resulting mixture was stirred at 15 °C for 24 h. Then, the isolated conjugate adduct was treated with  $\text{K}_2\text{CO}_3$  (2 equiv., 0.2 mmol) in  $\text{CH}_2\text{Cl}_2$  (1 mL) at 15 °C for 6 h. The solvent was removed under reduced pressure, the resulting residue was purified by column chromatography on silica gel (petroleum ether/ethyl acetate = 6:1) to give the 1,4-Benzoxazepines **4**.

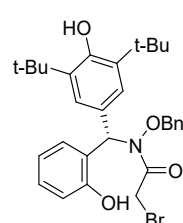

### (S)-4-(benzyloxy)-5-(3,5-di-tert-butyl-4-hydroxyphenyl)-4,5-

**dihydrobenzo[f][1,4]oxazepin-3(2H)-one (3a)**. white solid, mp 100-102 °C, 97% yield, 53.7 mg, 97:3 er. The enantiomeric excess was determined by HPLC on Daicel Chiralpak IA-H with hexane/*i*-PrOH (96:4) as the eluent, flow = 1.0

mL/min, UV = 254 nm,  $[\alpha]_D^{25} = -34$  ( $c = 1.0$  in  $\text{CH}_2\text{Cl}_2$ ).  $^1\text{H}$  NMR (600 MHz,

$\text{CDCl}_3$ )  $\delta$  7.36-7.32 (m, 4H), 7.28-7.27 (m, 3H), 7.19 (t,  $J = 7.6$  Hz, 1H), 7.11-7.10 (m, 2H), 6.94 (s, 1H), 6.90 (t,  $J = 7.5$  Hz, 1H), 6.84 (d,  $J = 7.9$  Hz, 1H), 5.28 (s, 1H), 4.57 (d,  $J = 9.6$  Hz, 1H), 4.46 (d,  $J = 9.6$  Hz, 1H), 4.07 (s, 2H), 1.42 (s, 18H).  $^{13}\text{C}$  NMR (151 MHz,  $\text{CDCl}_3$ )  $\delta$  154.6, 153.6, 136.0, 133.8, 130.1, 129.6, 129.1, 129.1, 129.0, 128.6, 126.6, 125.8, 124.6, 120.2, 116.7, 79.2,

62.0, 41.6, 34.4, 30.3. HRMS (ESI)  $m/z$ :  $[M + Na]^+$  Calcd for  $C_{30}H_{36}BrNO_4Na$  576.1720; Found 576.1728.

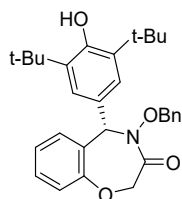

**(S)-4-(benzyloxy)-5-(3,5-di-tert-butyl-4-hydroxyphenyl)-4,5-dihydrobenzo[f][1,4]oxazepin-3(2H)-one (4a).** Purified by silica gel chromatography using PE/EA 6:1, white solid, mp 112-114 °C, 92% yield, 43.5 mg, 94:6 er. The enantiomeric excess was determined by HPLC on Daicel Chiralpak IB-H with hexane/*i*-PrOH (90:10) as the eluent, flow = 1.0 mL/min,

UV = 254 nm,  $[\alpha]_D^{25} = -44$  ( $c = 1.0$  in  $CH_2Cl_2$ ).  $^1H$  NMR (500 MHz,  $CDCl_3$ )  $\delta$  7.36–7.34 (m, 2H), 7.32–7.27 (m, 4H), 7.08 (s, 2H), 7.05–7.00 (m, 2H), 6.81 (dd,  $J = 7.6, 1.4$  Hz, 1H), 5.45 (s, 1H), 5.20 (s, 1H), 5.07 (d,  $J = 10.7$  Hz, 1H), 4.96 (d,  $J = 10.7$  Hz, 1H), 4.72 (d,  $J = 15.6$  Hz, 1H), 4.43 (d,  $J = 15.6$  Hz, 1H), 1.38 (s, 18H).  $^{13}C$  NMR (125 MHz,  $CDCl_3$ )  $\delta$  167.6, 156.6, 153.3, 135.9, 135.2, 131.3, 130.1, 129.9, 129.8, 128.7, 128.4, 123.7, 123.2, 121.0, 77.1, 72.3, 70.7, 34.3, 30.2. HRMS (ESI)  $m/z$ :  $[M + Na]^+$  Calcd for  $C_{30}H_{35}NO_4Na$  496.2458; Found 496.2466.

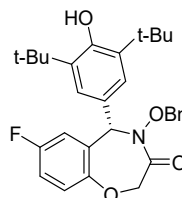

**(S)-4-(benzyloxy)-5-(3,5-di-tert-butyl-4-hydroxyphenyl)-7-fluoro-4,5-dihydrobenzo[f][1,4]oxazepin-3(2H)-one (4b).** Purified by silica gel chromatography using PE/EA 6:1, white solid, mp 67-59 °C, 91% yield, 44.7 mg, 92.5:7.5 er. The enantiomeric excess was determined by HPLC on Daicel Chiralpak IB-H with hexane/*i*-PrOH (90:10) as the eluent, flow = 1.0 mL/min,

UV = 254 nm,  $[\alpha]_D^{25} = -41$  ( $c = 1.0$  in  $CH_2Cl_2$ ).  $^1H$  NMR (500 MHz,  $CDCl_3$ )  $\delta$  7.36–7.28 (m, 5H), 7.06 (s, 2H), 7.02–6.09 (m, 2H), 6.44 (dd,  $J = 8.3, 2.4$  Hz, 1H), 5.32 (s, 1H), 5.22 (s, 1H), 5.08 (d,  $J = 10.8$  Hz, 1H), 4.94 (d,  $J = 10.8$  Hz, 1H), 4.71 (d,  $J = 15.8$  Hz, 1H), 4.41 (d,  $J = 15.8$  Hz, 1H), 1.38 (s, 16H).  $^{13}C$  NMR (125 MHz,  $CDCl_3$ )  $\delta$  167.4, 159.3, 157.4, 153.5, 152.6 (d,  $^4J_{C-F} = 2.4$  Hz), 136.1, 135.1, 130.7, 130.6 (d,  $^2J_{C-F} = 7.5$  Hz), 130.5, 129.9, 128.9, 128.5, 127.3 (d,  $^1J_{C-F} = 196.7$  Hz), 123.1, 122.3 (d,  $^2J_{C-F} = 8.4$  Hz), 116.4 (d,  $^3J_{C-F} = 3.1$  Hz), 116.2 (d,  $^3J_{C-F} = 4.1$  Hz), 77.1, 72.6, 70.4, 34.3, 30.2. HRMS (ESI)  $m/z$ :  $[M + Na]^+$  Calcd for  $C_{30}H_{34}FNO_4Na$  514.2364; Found 514.2369.

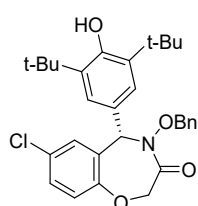

**(S)-4-(benzyloxy)-7-chloro-5-(3,5-di-tert-butyl-4-hydroxyphenyl)-4,5-dihydrobenzo[f][1,4]oxazepin-3(2H)-one (4c).** Purified by silica gel chromatography using PE/EA 6:1, white solid, mp 57-59 °C, 92% yield, 46.6 mg, 95:5 er. The enantiomeric excess was determined by HPLC on Daicel Chiralpak IB-H with hexane/*i*-PrOH (90:10) as the eluent, flow = 1.0 mL/min,

UV = 254 nm,  $[\alpha]_D^{25} = -59$  ( $c = 1.0$  in  $CH_2Cl_2$ ).  $^1H$  NMR (500 MHz,  $CDCl_3$ )  $\delta$  7.38–7.32 (m, 3H), 7.30–7.28 (m, 2H), 7.22 (dd,  $J = 8.6, 2.5$  Hz, 1H), 7.01 (s, 2H), 6.96 (d,  $J = 8.6$  Hz, 1H), 6.60 (d,  $J = 2.4$  Hz, 1H), 5.27 (s, 1H), 5.23 (s, 1H), 5.06 (d,  $J = 11.0$  Hz, 1H), 4.97 (d,  $J = 11.0$  Hz, 1H), 4.64 (d,  $J = 15.5$  Hz, 1H), 4.40 (d,  $J = 15.5$  Hz, 1H), 1.38 (s, 18H).  $^{13}C$  NMR (125 MHz,  $CDCl_3$ )  $\delta$  167.1, 155.0, 153.5, 136.1, 135.0, 130.7, 130.0, 129.8, 129.6, 129.3, 129.0, 128.5, 128.2, 123.0, 122.2, 77.2, 71.9, 70.2, 34.3, 30.1. HRMS (ESI)  $m/z$ :  $[M + Na]^+$  Calcd for  $C_{30}H_{34}ClNO_4Na$  530.2069; Found 530.2070.

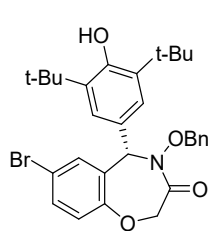

**(S)-4-(benzyloxy)-7-bromo-5-(3,5-di-tert-butyl-4-hydroxyphenyl)-4,5-**

**dihydrobenzo[f][1,4]oxazepin-3(2H)-one (4d).** Purified by silica gel chromatography using PE/EA 6:1, colorless oil, 90% yield, 49.6 mg, 94:6 er.

The enantiomeric excess was determined by HPLC on Daicel Chiralpak IB-H with hexane/*i*-PrOH (90:10) as the eluent, flow = 1.0 mL/min, UV = 254 nm,

$[\alpha]_D^{25} = -44$  ( $c = 1.0$  in  $\text{CH}_2\text{Cl}_2$ ).  $^1\text{H NMR}$  (500 MHz,  $\text{CDCl}_3$ )  $\delta$  7.39–7.32

(m, 4H), 7.30–7.28 (m, 2H), 7.01 (s, 2H), 6.90 (d,  $J = 8.6$  Hz, 1H), 6.73 (d,  $J = 1.9$  Hz, 1H), 5.27 (s, 1H), 5.23 (s, 1H), 5.06 (d,  $J = 11.1$  Hz, 1H), 4.98 (d,  $J = 11.0$  Hz, 1H), 4.62 (d,  $J = 15.4$  Hz, 1H), 4.39 (d,  $J = 15.4$  Hz, 1H), 1.38 (s, 18H).  $^{13}\text{C NMR}$  (125 MHz,  $\text{CDCl}_3$ )  $\delta$  167.1, 155.5, 153.5, 136.2, 135.0, 132.8, 132.6, 130.7, 130.0, 129.5, 129.0, 128.5, 123.0, 122.5, 115.6, 77.2, 71.8, 70.2, 34.3, 30.2. HRMS (ESI)  $m/z$ :  $[\text{M} + \text{Na}]^+$  Calcd for  $\text{C}_{30}\text{H}_{34}\text{BrNO}_4\text{Na}$  574.1563; Found 574.1571.

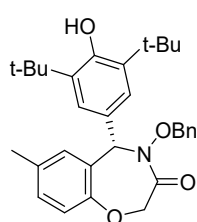

**(S)-4-(benzyloxy)-5-(3,5-di-tert-butyl-4-hydroxyphenyl)-7-methyl-4,5-**

**dihydrobenzo[f][1,4]oxazepin-3(2H)-one (4e).** Purified by silica gel chromatography using PE/EA 6:1, colorless oil, 87% yield, 42.3 mg, 92.5:7.5 er.

The enantiomeric excess was determined by HPLC on Daicel Chiralpak IB-H with hexane/*i*-PrOH (90:10) as the eluent, flow = 1.0 mL/min, UV = 254 nm,

$[\alpha]_D^{25} = -26$  ( $c = 1.0$  in  $\text{CH}_2\text{Cl}_2$ ).  $^1\text{H NMR}$  (500 MHz,  $\text{CDCl}_3$ )  $\delta$  7.36–7.34

(m, 2H), 7.33–7.28 (m, 3H), 7.11 (s, 2H), 7.07 (dd,  $J = 8.2, 1.7$  Hz, 1H), 6.93 (d,  $J = 8.1$  Hz, 1H), 6.58 (d,  $J = 1.6$  Hz, 1H), 5.37 (s, 1H), 5.19 (s, 1H), 5.07 (d,  $J = 10.7$  Hz, 1H), 4.92 (d,  $J = 10.7$  Hz, 1H), 4.74 (d,  $J = 15.8$  Hz, 1H), 4.41 (d,  $J = 15.8$  Hz, 1H), 2.28 (s, 3H), 1.38 (s, 18H).  $^{13}\text{C NMR}$  (125 MHz,  $\text{CDCl}_3$ )  $\delta$  167.6, 154.4, 153.3, 135.9, 135.3, 133.4, 131.3, 130.4, 130.4, 129.9, 129.0, 128.6, 128.4, 123.3, 120.7, 77.0, 72.7, 70.9, 34.3, 30.2, 20.6. HRMS (ESI)  $m/z$ :  $[\text{M} + \text{Na}]^+$  Calcd for  $\text{C}_{31}\text{H}_{37}\text{NO}_4\text{Na}$  510.2615; Found 510.2615.

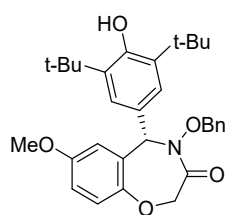

**(S)-4-(benzyloxy)-5-(3,5-di-tert-butyl-4-hydroxyphenyl)-7-methoxy-4,5-**

**dihydrobenzo[f][1,4]oxazepin-3(2H)-one (4f).** Purified by silica gel chromatography using PE/EA 6:1, colorless oil, 85% yield, 42.7 mg, 91:9 er.

The enantiomeric excess was determined by HPLC on Daicel Chiralpak IB-H with hexane/*i*-PrOH (90:10) as the eluent, flow = 1.0 mL/min, UV = 254

nm,  $[\alpha]_D^{25} = -17$  ( $c = 1.0$  in  $\text{CH}_2\text{Cl}_2$ ).  $^1\text{H NMR}$  (500 MHz,  $\text{CDCl}_3$ )  $\delta$  7.39-

7.38 (m, 3H), 7.33–7.32 (m, 2H), 7.12 (s, 2H), 6.98 (d,  $J = 8.8$  Hz, 1H), 6.80 (dd,  $J = 8.8, 3.0$  Hz, 1H), 6.35 (d,  $J = 3.0$  Hz, 1H), 5.36 (s, 1H), 5.20 (s, 1H), 5.08 (d,  $J = 10.7$  Hz, 1H), 4.92 (d,  $J = 10.7$  Hz, 1H), 4.76 (d,  $J = 16.0$  Hz, 1H), 4.41 (d,  $J = 16.0$  Hz, 1H), 3.76 (s, 3H), 1.39 (s, 18H).  $^{13}\text{C NMR}$  (125 MHz,  $\text{CDCl}_3$ )  $\delta$  167.7, 155.8, 153.3, 150.4, 135.9, 135.3, 130.9, 129.9, 128.7, 128.5, 128.4, 128.0, 123.3, 121.9, 114.9, 114.9, 78.0, 73.1, 71.0, 55.7, 34.3, 30.2. HRMS (ESI)  $m/z$ :  $[\text{M} + \text{Na}]^+$  Calcd for  $\text{C}_{31}\text{H}_{37}\text{BrNO}_5\text{Na}$  526.2564; Found 526.2577.

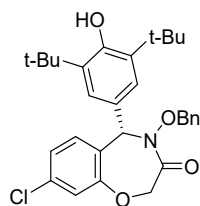

**(S)-4-(benzyloxy)-8-chloro-5-(3,5-di-tert-butyl-4-hydroxyphenyl)-4,5-dihydrobenzo[f][1,4]oxazepin-3(2H)-one (4g).** Purified by silica gel chromatography using PE/EA 6:1, colorless oil, 88% yield, 44.6 mg, 92:8 er. The enantiomeric excess was determined by HPLC on Daicel Chiralpak IB-H with hexane/i-PrOH (90:10) as the eluent, flow = 1.0 mL/min, UV = 254 nm,  $[\alpha]_D^{25} = -57$  (c = 1.0 in CH<sub>2</sub>Cl<sub>2</sub>). <sup>1</sup>H NMR (500 MHz, CDCl<sub>3</sub>) δ 7.34–7.30

(m, 3H), 7.28–7.25 (m, 2H), 7.05 (d, *J* = 2.1 Hz, 1H), 7.02 (s, 2H), 6.96 (dd, *J* = 8.2, 2.1 Hz, 1H), 6.65 (d, *J* = 8.2 Hz, 1H), 5.38 (s, 1H), 5.22 (s, 1H), 5.06 (d, *J* = 11.0 Hz, 1H), 4.98 (d, *J* = 10.9 Hz, 1H), 4.63 (d, *J* = 15.3 Hz, 1H), 4.42 (d, *J* = 15.3 Hz, 1H), 1.38 (s, 18H). <sup>13</sup>C NMR (125 MHz, CDCl<sub>3</sub>) δ 167.2, 157.0, 153.4, 136.2, 135.2, 134.6, 131.1, 131.0, 129.9, 128.8, 128.5, 126.1, 123.4, 123.0, 121.2, 77.2, 71.8, 70.0, 34.3, 30.2. HRMS (ESI) *m/z*: [M + Na]<sup>+</sup> Calcd for C<sub>30</sub>H<sub>34</sub>ClNO<sub>4</sub>Na 530.2069; Found 530.2063.

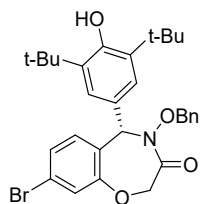

**(S)-4-(benzyloxy)-8-bromo-5-(3,5-di-tert-butyl-4-hydroxyphenyl)-4,5-dihydrobenzo[f][1,4]oxazepin-3(2H)-one (4h).** Purified by silica gel chromatography using PE/EA 6:1, colorless oil, 94% yield, 51.8 mg, 93:7 er. The enantiomeric excess was determined by HPLC on Daicel Chiralpak IB-H with hexane/i-PrOH (90:10) as the eluent, flow = 1.0 mL/min, UV = 254 nm,  $[\alpha]_D^{25} = -85$  (c = 1.0 in CH<sub>2</sub>Cl<sub>2</sub>). <sup>1</sup>H NMR (500 MHz, CDCl<sub>3</sub>) δ 7.35–7.26

(m, 5H), 7.22 (s, 1H), 7.13–7.11 (m, 1H), 7.04 (s, 2H), 6.59 (d, *J* = 8.1 Hz, 1H), 5.38 (s, 1H), 5.26 (s, 1H), 5.07 (d, *J* = 11.0 Hz, 1H), 4.98 (d, *J* = 10.9 Hz, 1H), 4.65 (d, *J* = 15.4 Hz, 1H), 4.43 (d, *J* = 15.3 Hz, 1H), 1.39 (s, 18H). <sup>13</sup>C NMR (125 MHz, CDCl<sub>3</sub>) δ 167.0, 156.9, 153.3, 136.0, 135.0, 131.2, 130.7, 129.7, 128.7, 128.3, 126.5, 126.2, 124.0, 122.8, 122.1, 77.0, 71.7, 69.9, 34.2, 30.0. HRMS (ESI) *m/z*: [M + Na]<sup>+</sup> Calcd for C<sub>30</sub>H<sub>34</sub>BrNO<sub>4</sub>Na 574.1563; Found 574.1569.

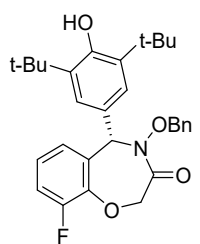

**(S)-4-(benzyloxy)-5-(3,5-di-tert-butyl-4-hydroxyphenyl)-9-fluoro-4,5-dihydrobenzo[f][1,4]oxazepin-3(2H)-one (4i).** Purified by silica gel chromatography using PE/EA 6:1, white solid, mp 121–123 °C, 95% yield, 46.6 mg, 97:3 er. The enantiomeric excess was determined by HPLC on Daicel Chiralpak IB-H with hexane/i-PrOH (90:10) as the eluent, flow = 1.0 mL/min, UV = 254 nm,  $[\alpha]_D^{25} = -85$  (c = 1.0 in CH<sub>2</sub>Cl<sub>2</sub>). <sup>1</sup>H NMR (600 MHz, CDCl<sub>3</sub>)

δ 7.37 (d, *J* = 7.7 Hz, 2H), 7.34–7.27 (m, 3H), 7.13–7.05 (m, 3H), 6.96 (td, *J* = 7.9, 4.8 Hz, 1H), 6.59 (d, *J* = 7.6 Hz, 1H), 5.50 (s, 1H), 5.26 (d, *J* = 2.9 Hz, 1H), 5.10 (dd, *J* = 10.8, 1.4 Hz, 1H), 5.00 (d, *J* = 10.9 Hz, 1H), 4.76 (dd, *J* = 15.6, 1.3 Hz, 1H), 4.53 (dd, *J* = 15.6, 1.1 Hz, 1H), 1.40 (s, 18H). <sup>13</sup>C NMR (151 MHz, CDCl<sub>3</sub>) δ 167.2, 154.1 (d, <sup>1</sup>*J*<sub>C-F</sub> = 247.1 Hz), 153.5, 144.4 (d, <sup>2</sup>*J*<sub>C-F</sub> = 12.3 Hz), 136.2, 135.2, 131.2, 130.8, 129.9, 128.8, 128.5, 125.0 (d, <sup>4</sup>*J*<sub>C-F</sub> = 3.4 Hz), 123.6 (d, <sup>3</sup>*J*<sub>C-F</sub> = 7.3 Hz), 123.0, 116.6 (d, <sup>2</sup>*J*<sub>C-F</sub> = 18.7 Hz), 77.2, 72.3, 70.3, 34.4, 30.2. HRMS (ESI) *m/z*: [M + Na]<sup>+</sup> Calcd for C<sub>30</sub>H<sub>34</sub>FNO<sub>4</sub>Na 524.2364; Found 514.2367.

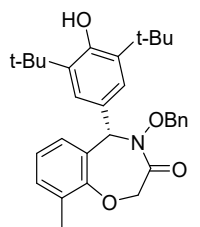

**(S)-4-(benzyloxy)-5-(3,5-di-tert-butyl-4-hydroxyphenyl)-9-methyl-4,5-dihydrobenzo[f][1,4]oxazepin-3(2H)-one (4j).** Purified by silica gel

chromatography using PE/EA 6:1, white solid, mp 61-63 °C, 87% yield, 42.3 mg, 90:10 er. The enantiomeric excess was determined by HPLC on Daicel Chiralpak IB-H with hexane/*i*-PrOH (90:10) as the eluent, flow = 1.0 mL/min, UV = 254 nm,  $[\alpha]_D^{25} = -66$  (c = 1.0 in CH<sub>2</sub>Cl<sub>2</sub>). <sup>1</sup>H NMR (500 MHz, CDCl<sub>3</sub>) δ 7.39-7.32 (m, 5H), 7.18 (d, *J* = 7.5 Hz, 1H), 7.14 (s, 2H), 6.97 (t, *J* = 7.6 Hz, 1H), 6.75 (d, *J* = 7.4 Hz, 1H), 5.49 (s, 1H), 5.23 (s, 1H), 5.13 (d, *J* = 10.6 Hz, 1H), 4.98 (d, *J* = 10.6 Hz, 1H), 4.86 (d, *J* = 16.0 Hz, 1H), 4.43 (d, *J* = 16.1 Hz, 1H), 2.26 (s, 3H), 1.42 (s, 18H). <sup>13</sup>C NMR (125 MHz, CDCl<sub>3</sub>) δ 167.6, 154.8, 153.2, 135.9, 135.3, 131.4, 131.2, 130.5, 130.4, 129.8, 128.8, 128.5, 127.6, 123.9, 123.2, 77.0, 72.1, 71.0, 34.4, 30.3, 15.7. HRMS (ESI) *m/z*: [M + Na]<sup>+</sup> Calcd for C<sub>31</sub>H<sub>37</sub>NO<sub>4</sub>Na 510.2615; Found 510.2621.

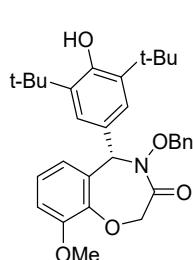

**(S)-4-(benzyloxy)-5-(3,5-di-tert-butyl-4-hydroxyphenyl)-9-methoxy-4,5-**

**dihydrobenzo[f][1,4]oxazepin-3(2H)-one (4k).** Purified by silica gel chromatography using PE/EA 6:1, colorless oil, 89% yield, 44.7 mg, 94:6 er. The enantiomeric excess was determined by HPLC on Daicel Chiralpak IB-H with hexane/*i*-PrOH (90:10) as the eluent, flow = 1.0 mL/min, UV = 254 nm,

$[\alpha]_D^{25} = -21$  (c = 1.0 in CH<sub>2</sub>Cl<sub>2</sub>). <sup>1</sup>H NMR (500 MHz, CDCl<sub>3</sub>) δ 7.38 (d, *J* =

4.5 Hz, 1H), 7.37–7.35 (m, 2H), 7.33–7.31 (m, 1H), 7.13 (s, 2H), 7.00 (t, *J* = 7.9 Hz, 1H), 6.90 (dd, *J* = 8.3, 1.2 Hz, 1H), 6.51 (d, *J* = 7.6 Hz, 1H), 5.49 (s, 1H), 5.20 (s, 1H), 5.10 (d, *J* = 10.5 Hz, 1H), 4.94 (d, *J* = 10.5 Hz, 1H), 4.87 (d, *J* = 16.0 Hz, 1H), 4.49 (d, *J* = 16.0 Hz, 1H), 3.86 (s, 3H), 1.39 (s, 18H). <sup>13</sup>C NMR (125 MHz, CDCl<sub>3</sub>) δ 167.5, 153.2, 151.5, 145.4, 135.8, 135.2, 131.9, 130.7, 129.7, 128.7, 128.4, 128.3, 127.9, 124.3, 123.0, 121.2, 112.3, 77.9, 72.6, 70.8, 56.0, 34.2, 30.1. HRMS (ESI) *m/z*: [M + Na]<sup>+</sup> Calcd for C<sub>31</sub>H<sub>37</sub>NO<sub>5</sub>Na 526.2564; Found 526.2569.

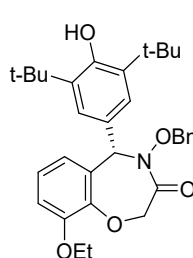

**(S)-4-(benzyloxy)-5-(3,5-di-tert-butyl-4-hydroxyphenyl)-9-ethoxy-4,5-**

**dihydrobenzo[f][1,4]oxazepin-3(2H)-one (4l).** Purified by silica gel chromatography using PE/EA 6:1, white solid, mp 169-171 °C, 91% yield, 47.0 mg, 95:5 er. The enantiomeric excess was determined by HPLC on Daicel Chiralpak IB-H with hexane/*i*-PrOH (90:10) as the eluent, flow = 1.0

mL/min, UV = 254 nm,  $[\alpha]_D^{25} = -98$  (c = 1.0 in CH<sub>2</sub>Cl<sub>2</sub>). <sup>1</sup>H NMR (500 MHz,

CDCl<sub>3</sub>) δ 7.37-7.36 (m, 2H), 7.34–7.29 (m, 3H), 7.09 (s, 2H), 6.97 (t, *J* = 7.9 Hz, 1H), 6.89 (dd, *J* = 8.2, 1.2 Hz, 1H), 6.50 (d, *J* = 7.6 Hz, 1H), 5.48 (s, 1H), 5.16 (s, 1H), 5.09 (d, *J* = 10.6 Hz, 1H), 4.95 (d, *J* = 10.5 Hz, 1H), 4.84 (d, *J* = 16.1 Hz, 1H), 4.46 (d, *J* = 16.1 Hz, 1H), 4.09 (q, *J* = 7.0 Hz, 2H), 1.44 (t, *J* = 7.0 Hz, 3H), 1.38 (s, 18H). <sup>13</sup>C NMR (125 MHz, CDCl<sub>3</sub>) δ 167.7, 153.2, 150.9, 145.9, 135.8, 135.3, 132.3, 130.9, 129.7, 128.7, 128.4, 124.3, 123.0, 121.3, 113.9, 77.1, 72.6, 70.8, 64.6, 34.3, 30.2, 14.8. HRMS (ESI) *m/z*: [M + Na]<sup>+</sup> Calcd for C<sub>32</sub>H<sub>39</sub>NO<sub>5</sub>Na 540.2720; Found 540.2726.

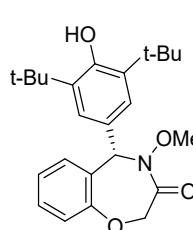

**(S)-5-(3,5-di-tert-butyl-4-hydroxyphenyl)-4-methoxy-4,5-**

**dihydrobenzo[f][1,4]oxazepin-3(2H)-one (4m).** Purified by silica gel chromatography using PE/EA 6:1, white solid, mp 186-188 °C, 96% yield, 38.1 mg, 94.5:5.5 er. The enantiomeric excess was determined by HPLC on

Daicel Chiralpak ID-H with hexane/*i*-PrOH (90:10) as the eluent, flow = 1.0 mL/min, UV = 254 nm,  $[\alpha]_D^{25} = -31$  (c = 1.0 in CH<sub>2</sub>Cl<sub>2</sub>). <sup>1</sup>H NMR (500 MHz, CDCl<sub>3</sub>) δ 7.36–7.32 (m, 2H), 7.16 (td, *J* = 7.5, 1.2 Hz, 1H), 7.11 (s, 2H), 7.08 (dd, *J* = 8.0, 1.0 Hz, 1H), 5.77 (s, 1H), 5.22 (s, 1H), 4.77 (d, *J* = 15.8 Hz, 1H), 4.42 (d, *J* = 15.8 Hz, 1H), 3.85 (s, 3H), 1.39 (s, 18H). <sup>13</sup>C NMR (125 MHz, CDCl<sub>3</sub>) δ 167.2, 156.6, 153.3, 136.0, 131.0, 130.2, 129.9, 129.8, 124.2, 123.1, 121.4, 72.5, 69.2, 62.4, 34.3, 30.2. HRMS (ESI) *m/z*: [M + Na]<sup>+</sup> Calcd for C<sub>24</sub>H<sub>31</sub>NO<sub>4</sub>Na 420.2145; Found 420.2149.

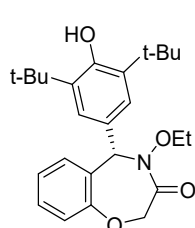

**(S)-5-(3,5-di-tert-butyl-4-hydroxyphenyl)-4-ethoxy-4,5-**

**dihydrobenzo[f][1,4]oxazepin-3(2H)-one (4n).** Purified by silica gel chromatography using PE/EA 6:1, white solid, mp 168-170 °C, 95% yield, 39.0 mg, 93:7 er. The enantiomeric excess was determined by HPLC on Daicel Chiralpak ID-H with hexane/*i*-PrOH (90:10) as the eluent, flow = 1.0 mL/min,

UV = 254 nm,  $[\alpha]_D^{25} = -32$  (c = 1.0 in CH<sub>2</sub>Cl<sub>2</sub>). <sup>1</sup>H NMR (500 MHz, CDCl<sub>3</sub>)

δ 7.34-7.31 (m, 2H), 7.15 (td, *J* = 7.5, 1.1 Hz, 1H), 7.12 (s, 2H), 7.08 (d, *J* = 8.0 Hz, 1H), 5.75 (s, 1H), 5.22 (s, 1H), 4.72 (d, *J* = 15.7 Hz, 1H), 4.42 (d, *J* = 15.7 Hz, 1H), 4.08 (ddq, *J* = 39.3, 9.0, 7.1 Hz, 2H), 1.39 (s, 18H), 1.28 (t, *J* = 7.1 Hz, 3H). <sup>13</sup>C NMR (125 MHz, CDCl<sub>3</sub>) δ 167.4, 156.6, 153.3, 135.9, 131.3, 130.1, 129.2, 123.9, 123.2, 121.3, 72.3, 70.3, 69.9, 34.3, 30.2, 13.7. HRMS (ESI) *m/z*: [M + Na]<sup>+</sup> Calcd for C<sub>25</sub>H<sub>33</sub>NO<sub>4</sub>Na 434.2302; Found 434.2300.

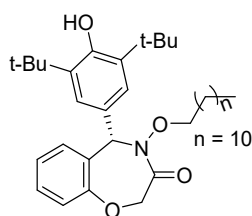

**(S)-5-(3,5-di-tert-butyl-4-hydroxyphenyl)-4-(dodecyloxy)-4,5-**

**dihydrobenzo[f][1,4]oxazepin-3(2H)-one (4o).** Purified by silica gel chromatography using PE/EA 6:1, colorless oil, 90% yield, 49.5 mg, 91:9 er. The enantiomeric excess was determined by HPLC on Daicel Chiralpak IA-H with hexane/*i*-PrOH (95:5) as the eluent, flow = 1.0

mL/min, UV = 254 nm,  $[\alpha]_D^{25} = -37$  (c = 1.0 in CH<sub>2</sub>Cl<sub>2</sub>). <sup>1</sup>H NMR (600

MHz, CDCl<sub>3</sub>) δ 7.35-7.30 (m, 2H), 7.28 (s, 1H), 7.16-7.14 (m, 3H), 7.09 (dd, *J* = 8.0, 1.0 Hz, 1H), 5.74 (s, 1H), 5.21 (s, 1H), 4.72 (d, *J* = 15.7 Hz, 1H), 4.41 (d, *J* = 15.7 Hz, 1H), 4.05-3.96 (m, 2H), 1.68-1.69 (m, 2H), 1.40 (s, 18H), 1.33-1.28 (m, 18H), 0.91 (t, *J* = 7.0 Hz, 3H). <sup>13</sup>C NMR (151 MHz, CDCl<sub>3</sub>) δ 167.2, 156.6, 153.3, 135.9, 131.4, 130.1, 129.3, 123.9, 123.4, 121.3, 75.0, 72.3, 69.9, 34.4, 31.9, 30.2, 29.7, 29.6, 29.6, 29.5, 29.4, 29.4, 28.2, 26.0, 22.7, 14.1. HRMS (ESI) *m/z*: [M + Na]<sup>+</sup> Calcd for C<sub>35</sub>H<sub>53</sub>NO<sub>4</sub>Na 574.3867; Found 574.3864.

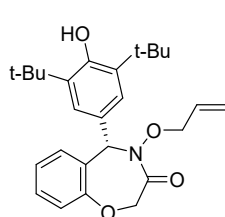

**(S)-4-(allyloxy)-5-(3,5-di-tert-butyl-4-hydroxyphenyl)-4,5-**

**dihydrobenzo[f][1,4]oxazepin-3(2H)-one (4p).** Purified by silica gel chromatography using PE/EA 6:1, white solid, mp 118-120 °C, 94% yield, 39.7 mg, 95.5:4.5 er. The enantiomeric excess was determined by HPLC on Daicel Chiralpak ID-H with hexane/*i*-PrOH (90:10) as the eluent, flow = 1.0

mL/min, UV = 254 nm,  $[\alpha]_D^{25} = -29$  (c = 1.0 in CH<sub>2</sub>Cl<sub>2</sub>). <sup>1</sup>H NMR (500

MHz, CDCl<sub>3</sub>) δ 7.34–7.28 (m, 2H), 7.14 (td, *J* = 7.5, 1.2 Hz, 1H), 7.12 (s, 2H), 7.08 (dd, *J* = 8.0,

1.0 Hz, 1H), 6.00 (ddt,  $J = 17.0, 10.3, 6.5$  Hz, 1H), 5.75 (s, 1H), 5.28– 5.22 (m, 2H), 5.22 (s, 1H), 4.72 (d,  $J = 15.7$  Hz, 1H), 4.50 (ddd,  $J = 35.3, 11.6, 6.5$  Hz, 2H), 4.41 (d,  $J = 15.7$  Hz, 1H), 1.39 (s, 18H).  $^{13}\text{C}$  NMR (125 MHz,  $\text{CDCl}_3$ )  $\delta$  167.6, 156.7, 153.3, 136.0, 132.0, 131.2, 130.1, 130.1, 129.1, 123.9, 123.2, 121.2, 120.8, 76.0, 72.3, 70.2, 34.3, 30.2. HRMS (ESI)  $m/z$ :  $[\text{M} + \text{Na}]^+$  Calcd for  $\text{C}_{26}\text{H}_{33}\text{NO}_4\text{Na}$  446.2303; Found 446.2305.

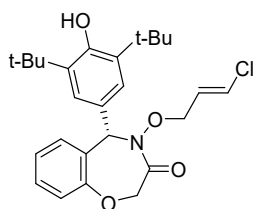

**(S,E)-4-((3-chloroallyl)oxy)-5-(3,5-di-tert-butyl-4-hydroxyphenyl)-4,5-dihydrobenzo[f][1,4]oxazepin-3(2H)-one (4q).** Purified by silica gel chromatography using PE/EA 6:1, colorless oil, 91% yield, 41.6 mg, 93:7 er. The enantiomeric excess was determined by HPLC on Daicel Chiralpak IF-H with hexane/*i*-PrOH (95:5) as the eluent, flow = 1.0

mL/min, UV = 254 nm,  $[\alpha]_D^{25} = -19$  ( $c = 1.0$  in  $\text{CH}_2\text{Cl}_2$ ).  $^1\text{H}$  NMR (400

MHz, Chloroform-*d*)  $\delta$  7.33 (dd,  $J = 20.9, 9.5$  Hz, 2H), 7.17 (t,  $J = 7.4$  Hz, 1H), 7.09 (d,  $J = 9.2$  Hz, 3H), 6.23 (s, 1H), 6.09 (dt,  $J = 13.9, 7.2$  Hz, 1H), 5.71 (s, 1H), 5.23 (s, 1H), 4.74 (d,  $J = 15.8$  Hz, 1H), 4.56 – 4.51 (m, 1H), 4.45 – 4.41 (m, 2H), 1.40 (s, 18H).  $^{13}\text{C}$  NMR (101 MHz,  $\text{CDCl}_3$ )  $\delta$  167.75, 156.61, 153.42, 136.03, 130.99, 130.21, 130.19, 128.96, 127.35, 125.18, 124.16, 123.13, 121.32, 72.86, 72.35, 70.73, 34.36, 30.19. HRMS (ESI)  $m/z$ :  $[\text{M} + \text{Na}]^+$  Calcd for  $\text{C}_{26}\text{H}_{32}\text{ClNO}_4\text{Na}$  480.1912; Found 480.1915.

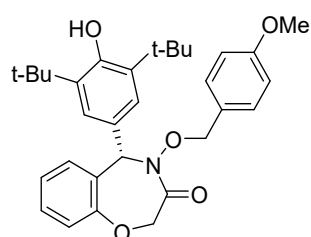

**(S)-5-(3,5-di-tert-butyl-4-hydroxyphenyl)-4-((4-methoxybenzyl)oxy)-4,5-dihydrobenzo[f][1,4]oxazepin-3(2H)-one (4r).** Purified by silica gel chromatography using PE/EA 6:1, colorless oil, 88% yield, 44.2 mg, 93:7 er. The enantiomeric excess was determined by HPLC on Daicel Chiralpak IA-H with hexane/*i*-PrOH (90:10) as the eluent, flow = 1.0 mL/min, UV = 254 nm,

$[\alpha]_D^{25} = -13$  ( $c = 1.0$  in  $\text{CH}_2\text{Cl}_2$ ).  $^1\text{H}$  NMR (500 MHz,  $\text{CDCl}_3$ )  $\delta$

7.29–7.25 (m, 3H), 7.07 (s, 2H), 7.04–6.99 (m, 2H), 6.81 (d,  $J = 7.5$  Hz, 1H), 6.77 (d,  $J = 8.5$  Hz, 2H), 5.42 (s, 1H), 5.22 (s, 1H), 5.05 (d,  $J = 10.7$  Hz, 1H), 4.91 (d,  $J = 10.7$  Hz, 1H), 4.69 (d,  $J = 15.5$  Hz, 1H), 4.42 (d,  $J = 15.5$  Hz, 1H), 3.79 (s, 3H), 1.38 (s, 18H).  $^{13}\text{C}$  NMR (125 MHz,  $\text{CDCl}_3$ )  $\delta$  167.4, 160.0, 156.5, 153.2, 135.9, 131.4, 130.2, 129.7, 128.1, 127.3, 123.3, 123.1, 120.8, 113.7, 76.6, 72.0, 70.6, 55.1, 34.3, 30.1. HRMS (ESI)  $m/z$ :  $[\text{M} + \text{Na}]^+$  Calcd for  $\text{C}_{31}\text{H}_{37}\text{BrNO}_5\text{Na}$  526.2564; Found 526.2562.

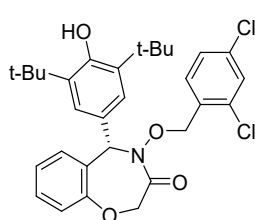

**(S)-5-(3,5-di-tert-butyl-4-hydroxyphenyl)-4-((2,4-dichlorobenzyl)oxy)-4,5-dihydrobenzo[f][1,4]oxazepin-3(2H)-one (4s).** Purified by silica gel chromatography using PE/EA 6:1, colorless oil, 86% yield, 46.6 mg, 93:7 er. The enantiomeric excess was determined by HPLC on Daicel Chiralpak IF-H with hexane/*i*-PrOH (90:10) as the

eluent, flow = 1.0 mL/min, UV = 254 nm,  $[\alpha]_D^{25} = -16$  ( $c = 1.0$  in

$\text{CH}_2\text{Cl}_2$ ).  $^1\text{H}$  NMR (400 MHz,  $\text{CDCl}_3$ )  $\delta$  7.43 – 7.21 (m, 3H), 7.07 – 7.02 (m, 5H), 6.88 (d,  $J = 7.3$  Hz, 1H), 5.52 (s, 1H), 5.25 – 5.15 (m, 2H), 5.10 (d,  $J = 11.4$  Hz, 1H), 4.64 (d,  $J = 15.3$  Hz, 1H),



4.41 (d,  $J = 15.3$  Hz, 1H), 1.37 (s, 18H).  $^{13}\text{C}$  NMR (101 MHz,  $\text{CDCl}_3$ )  $\delta$  167.44, 156.29, 153.39, 135.98, 135.47, 135.36, 132.95, 131.50, 131.34, 130.07, 129.91, 129.33, 127.15, 127.05, 123.33, 123.22, 120.82, 73.03, 71.63, 70.40, 34.34, 30.15. HRMS (ESI)  $m/z$ :  $[\text{M} + \text{Na}]^+$  Calcd for  $\text{C}_{30}\text{H}_{33}\text{Cl}_2\text{NO}_4\text{Na}$  564.1679; Found 564.1674.

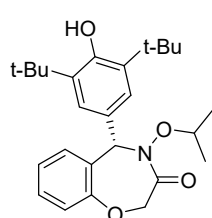

**(S)-5-(3,5-di-tert-butyl-4-hydroxyphenyl)-4-isopropoxy-4,5-**

**dihydrobenzo[f][1,4]oxazepin-3(2H)-one (4t).** Purified by silica gel chromatography using PE/EA 6:1, colorless oil, 74% yield, 31.4 mg, 83:17 er. The enantiomeric excess was determined by HPLC on Daicel Chiralpak AD-H with hexane/*i*-PrOH (90:10) as the eluent, flow = 1.0 mL/min, UV = 254

nm,  $[\alpha]_D^{25} = -2.7$  ( $c = 1.0$  in  $\text{CH}_2\text{Cl}_2$ ).  $^1\text{H}$  NMR (400 MHz,  $\text{CDCl}_3$ )  $\delta$  7.34

(ddd,  $J = 8.0, 7.3, 1.7$  Hz, 1H), 7.27 (dd,  $J = 7.6, 1.7$  Hz, 1H), 7.13 (td,  $J = 7.4, 1.2$  Hz, 1H), 7.09 – 7.07 (m, 3H), 5.74 (s, 1H), 5.22 (s, 1H), 4.59 (d,  $J = 15.2$  Hz, 1H), 4.44 – 4.37 (m, 2H), 1.38 (s, 18H), 1.29 (d,  $J = 6.2$  Hz, 3H), 1.26 (d,  $J = 6.2$  Hz, 3H).  $^{13}\text{C}$  NMR (101 MHz,  $\text{CDCl}_3$ )  $\delta$  168.79, 156.62, 153.28, 135.93, 131.84, 130.52, 129.91, 127.13, 123.21, 123.09, 121.07, 76.82, 71.61, 70.44, 34.35, 30.18, 21.22, 20.80. HRMS (ESI)  $m/z$ :  $[\text{M} + \text{Na}]^+$  Calcd for  $\text{C}_{26}\text{H}_{35}\text{NO}_4\text{Na}$  448.2458; Found 448.2461.

**Scheme S1** List of unsuccessful  $\alpha$ -haloamides

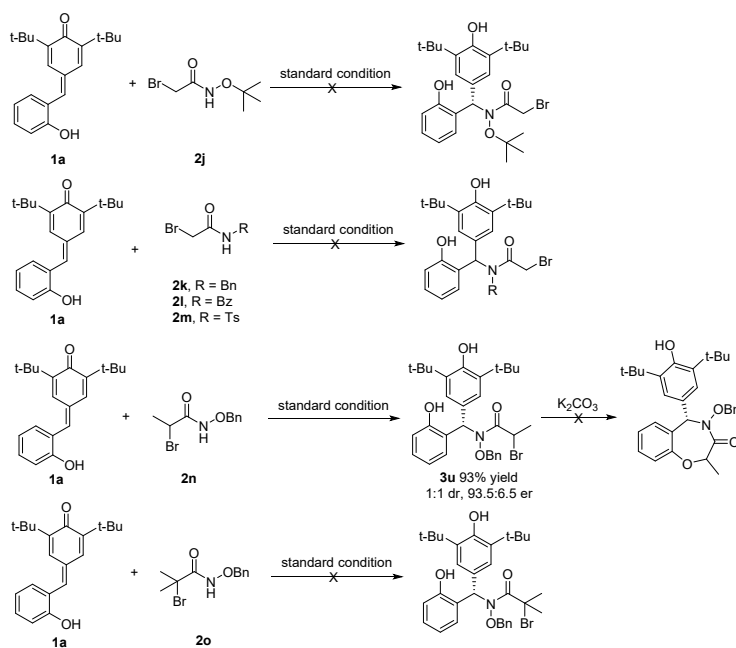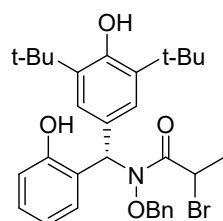

**N-(benzyloxy)-2-bromo-N-((S)-(3,5-di-tert-butyl-4-hydroxyphenyl)(2-**

**hydroxyphenyl)methyl)propanamide (3u).** Purified by silica gel chromatography using PE/EA 6:1, colorless oil, 93% yield, 52.8 mg, 1:1 dr, 93.5:6.5 er. The enantiomeric excess was determined by HPLC on Daicel Chiralpak IF-H with hexane/*i*-PrOH (90:10) as the eluent, flow = 1.0

mL/min, UV = 254 nm,  $[\alpha]_D^{25} = 8$  ( $c = 1.0$  in  $\text{CH}_2\text{Cl}_2$ ).  $^1\text{H}$  NMR (400 MHz,  $\text{CDCl}_3$ )  $\delta$  7.39 – 7.35 (m, 4H), 7.28 (s, 1H), 7.24 – 7.20 (m, 3H), 7.14 (d,  $J = 5.7$  Hz, 2H), 6.90 (dd,

$J = 16.3, 7.7$  Hz, 2H), 6.73 (s, 1H), 5.27 (s, 1H), 4.82 (s, 1H), 4.69 (s, 1H), 4.53 (s, 1H), 1.68 (d,  $J = 6.7$  Hz, 3H), 1.40 (s, 18H).  $^{13}\text{C}$  NMR (101 MHz,  $\text{CDCl}_3$ )  $\delta$  153.66, 133.31, 130.67, 129.81, 129.23, 129.10, 128.70, 126.00, 125.54, 119.99, 116.43, 77.24, 63.23, 37.13, 33.67, 30.27, 21.15. HRMS (ESI)  $m/z$ :  $[\text{M} + \text{Na}]^+$  Calcd for  $\text{C}_{31}\text{H}_{38}\text{NBrNO}_4\text{Na}$  590.1876; Found 590.1881.

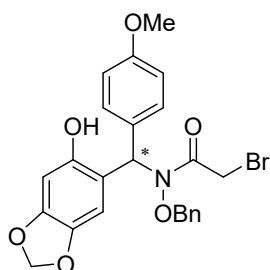

**N-(benzyloxy)-2-bromo-N-((6-hydroxybenzo[d][1,3]dioxol-5-yl)(4-methoxyphenyl)methyl)acetamide (8a).** Purified by silica gel chromatography using PE/EA 3:1, colorless oil, 85% yield, 42.5 mg, 92.5:7.5 er. The enantiomeric excess was determined by HPLC on Daicel Chiralpak IC-H with hexane/*i*-PrOH (80:20) as the eluent, flow = 1.0 mL/min, UV = 254 nm,  $[\alpha]_D^{25} = 6$  ( $c = 1.0$  in  $\text{CH}_2\text{Cl}_2$ ).  $^1\text{H}$  NMR

(400 MHz,  $\text{CDCl}_3$ )  $\delta$  7.43 (s, 1H), 7.37-7.34 (m, 4H), 7.18 (dd,  $J = 6.5, 3.2$  Hz, 2H), 6.91 (d,  $J = 8.8$  Hz, 2H), 6.83 (s, 1H), 6.79 (d,  $J = 2.1$  Hz, 1H), 5.92-5.91 (m, 2H), 4.58-4.46 (m, 2H), 4.05 (d,  $J = 1.5$  Hz, 1H), 3.82 (s, 3H), 1.73 (s, 2H).  $^{13}\text{C}$  NMR (100 MHz,  $\text{CDCl}_3$ )  $\delta$  159.3, 149.6, 148.1, 141.2, 133.6, 129.8, 129.8, 129.4, 129.3, 129.2, 128.7, 116.3, 114.5, 114.1, 109.1, 101.2, 99.0, 79.5, 60.8, 55.3, 26.1. HRMS (ESI)  $m/z$ :  $[\text{M} + \text{Na}]^+$  Calcd for  $\text{C}_{24}\text{H}_{22}\text{BrNO}_6\text{Na}$  522.0523; Found 522.0519.

### 3. Scale-up experiment

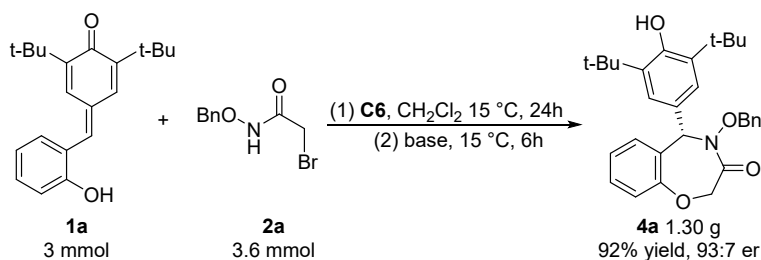

A Schlenk tube equipped with a magnetic stir bar was charged with **C6** (0.3 mmol), **1** (3 mmol), **2** (3.6 mmol) in 1.5 mL DCM. The resulting mixture was stirred at 15 °C for 24 h. Then  $\text{K}_2\text{CO}_3$  (6 mmol) was added to the solution and the resulting mixture was stirred at 15 °C for 6 h. The solvent was removed under reduced pressure, the resulting residue was purified by column chromatography on silica gel (petroleum ether/ethyl acetate = 6:1) to give the 1,4-Benzoxazepines **4a**.

### 4. Synthetic transformations of products

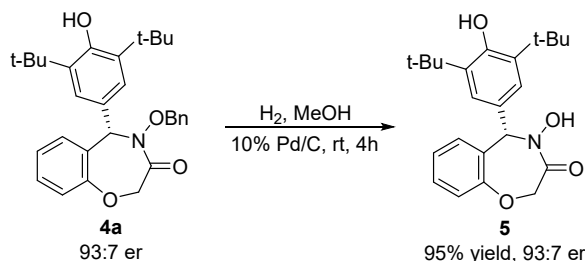

Compound **4a** (0.1 mmol) was dissolved in MeOH (2 mL) and then 10% Pd/C (3 mg) was added. The reaction mixture was stirred under  $\text{H}_2$  atmosphere for 4 h at room temperature. After filtration through a plug of Celite, the resulting residue was purified by column chromatography on silica gel (petroleum ether/ethyl acetate = 4:1) to give the **5**. (48 mg, 94% yield).

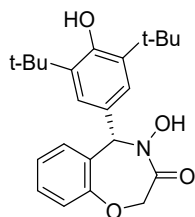

**(S)-5-(3,5-di-tert-butyl-4-hydroxyphenyl)-4-hydroxy-4,5-dihydrobenzo[f][1,4]oxazepin-3(2H)-one (5).** Purified by silica gel chromatography using PE/EA 4:1, white solid, mp 173-175 °C, 95% yield, 36.3 mg, 93:7 er. The enantiomeric excess was determined by HPLC on Daicel Chiralpak IB-H with hexane/*i*-PrOH (95:5) as the eluent, flow = 1.0 mL/min,

UV = 254 nm,  $[\alpha]_D^{25} = -60$  (c = 1.0 in CH<sub>2</sub>Cl<sub>2</sub>). <sup>1</sup>H NMR (600 MHz, CDCl<sub>3</sub>)

δ 8.89 (s, 1H), 7.39-7.36 (m, 2H), 7.28 (s, 1H), 7.21 (t, *J* = 7.3 Hz, 1H), 7.17 (s, 2H), 7.15 (d, *J* = 7.8 Hz, 1H), 5.88 (s, 1H), 5.22 (s, 1H), 5.00 (d, *J* = 15.8 Hz, 1H), 4.54 (d, *J* = 15.7 Hz, 1H), 1.41 (s, 18H). <sup>13</sup>C NMR (151 MHz, CDCl<sub>3</sub>) δ 156.6, 153.5, 135.9, 131.3, 130.5, 129.9, 129.7, 125.2, 123.3, 121.9, 72.0, 68.3, 34.3, 30.2. HRMS (ESI) *m/z*: [M + Na]<sup>+</sup> Calcd for C<sub>23</sub>H<sub>29</sub>NO<sub>4</sub>Na 406.1989; Found 406.1995.

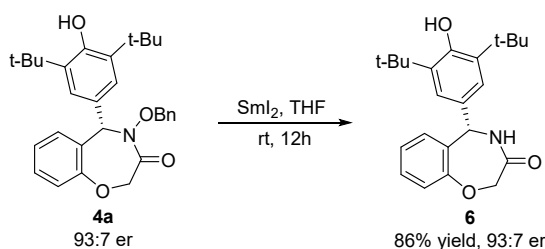

A 50 mL Schlenk tube equipped with a magnetic stir bar was charged with **4a** (0.1 mmol) under Argon, and anhydrous THF (2 mL) was added at room temperature. Then SmI<sub>2</sub> (3 mL, 0.1 M in THF) was added to the stirring solution dropwise via syringe. After the reaction is complete, the solution was diluted with CH<sub>2</sub>Cl<sub>2</sub> (5 mL) and quenched with a 10% solution of Na<sub>2</sub>S<sub>2</sub>O<sub>3</sub> (5 mL). The layers were separated, and the aqueous layer was extracted with CH<sub>2</sub>Cl<sub>2</sub> (3×5 mL). The combined organic layers were washed with brine. The solvent was removed under reduced pressure, the resulting residue was purified by column chromatography on silica gel (petroleum ether/ethyl acetate = 3:1) to give the **6**.

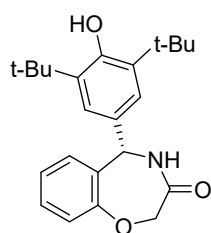

**(S)-5-(3,5-di-tert-butyl-4-hydroxyphenyl)-4,5-dihydrobenzo[f][1,4]oxazepin-3(2H)-one (6),** Purified by silica gel chromatography using PE/EA 3:1, colorless oil, 86% yield, 31.5 mg, 93:7 er. The enantiomeric excess was determined by HPLC on Daicel Chiralpak IA-H with hexane/*i*-PrOH (90:10) as the eluent, flow = 1.0 mL/min, UV =

254 nm,  $[\alpha]_D^{25} = -23$  (c = 1.0 in CH<sub>2</sub>Cl<sub>2</sub>). <sup>1</sup>H NMR (600 MHz,

Chloroform-*d*) δ 7.34 (td, *J* = 7.7, 1.4 Hz, 1H), 7.31-7.28 (m, 1H), 7.26-7.23 (m, 1H), 7.17-7.16 (m, 1H), 7.10 (td, *J* = 7.6, 1.0 Hz, 1H), 6.82-6.80 (m, 1H), 6.60 (d, *J* = 2.1, 1H), 5.89 (d, *J* = 2.9 Hz, 1H), 5.36 (s, 1H), 4.81 (d, *J* = 16.9 Hz, 1H), 4.51 (d, *J* = 16.9 Hz, 1H), 1.46 (s, 18H). <sup>13</sup>C NMR (151 MHz, CDCl<sub>3</sub>) δ 171.87, 157.51, 153.86, 136.66, 136.03, 129.88, 129.27, 128.32, 128.15, 127.98, 127.10, 124.85, 124.26, 121.11, 72.77, 57.09, 34.49, 30.26. HRMS (ESI) *m/z*: [M + Na]<sup>+</sup> Calcd for C<sub>23</sub>H<sub>29</sub>NO<sub>3</sub>Na 390.2040; Found 390.2043.

## 5. HPLC spectra of products

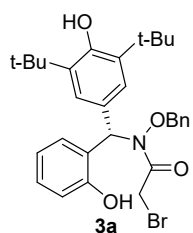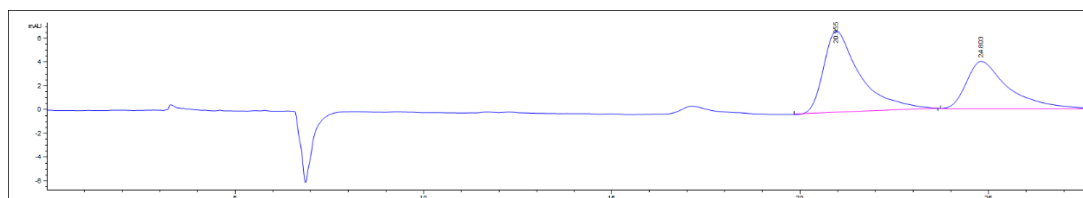

| # | 时间     | 峰面积   | 峰高  | 峰宽     | 对称因子  | 峰面积 %  | 类型 |
|---|--------|-------|-----|--------|-------|--------|----|
| 1 | 20.955 | 467.4 | 6.9 | 0.9655 | 0.509 | 59.426 | BB |
| 2 | 24.803 | 319.1 | 4   | 1.3155 | 0.531 | 40.574 | MM |

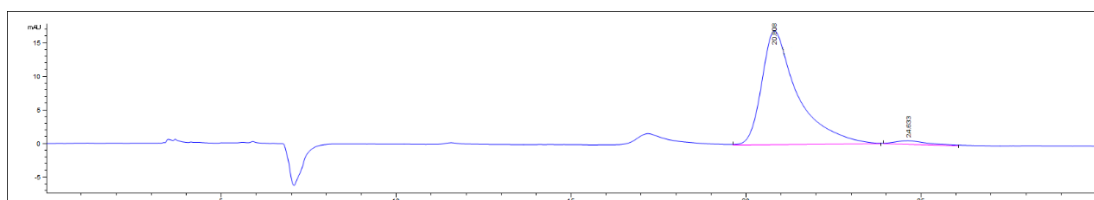

| # | 时间     | 峰面积    | 峰高     | 峰宽     | 对称因子  | 峰面积 %  | 类型 |
|---|--------|--------|--------|--------|-------|--------|----|
| 1 | 20.808 | 1218.4 | 16.9   | 1.1989 | 0.531 | 97.102 | MM |
| 2 | 24.633 | 36.4   | 5.5E-1 | 1.0959 | 0.657 | 2.898  | MM |

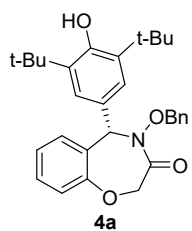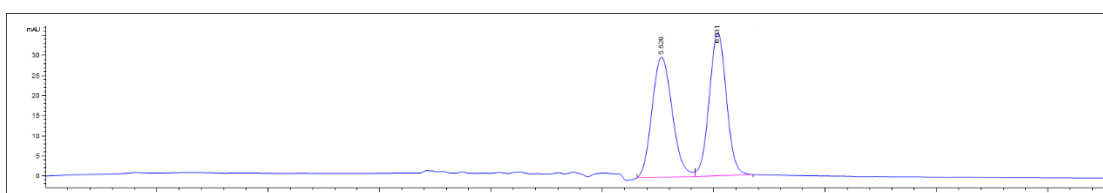

| # | 时间    | 峰面积   | 峰高   | 峰宽     | 对称因子  | 峰面积 %  | 类型 |
|---|-------|-------|------|--------|-------|--------|----|
| 1 | 5.526 | 379.6 | 29.9 | 0.2116 | 0     | 49.901 | MF |
| 2 | 6.031 | 381.1 | 35.6 | 0.1784 | 0.957 | 50.099 | FM |

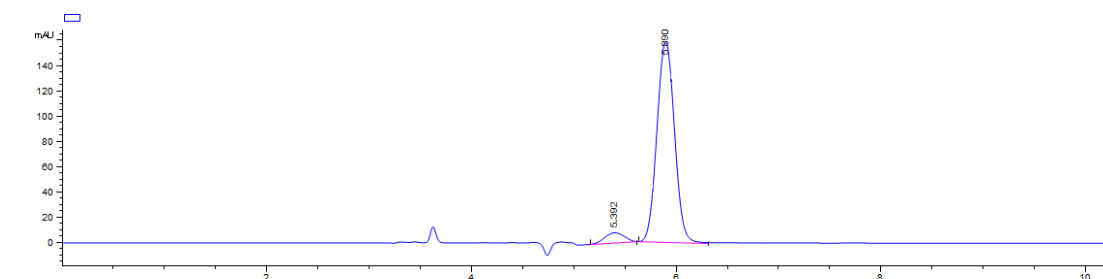

| # | 时间    | 峰面积    | 峰高    | 峰宽     | 对称因子  | 峰面积 %  | 类型 |
|---|-------|--------|-------|--------|-------|--------|----|
| 1 | 5.392 | 125.1  | 8.8   | 0.2379 | 1.011 | 6.112  | MM |
| 2 | 5.89  | 1922.2 | 160.2 | 0.2    | 0.949 | 93.888 | MM |

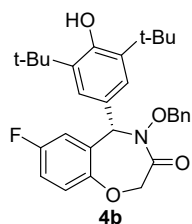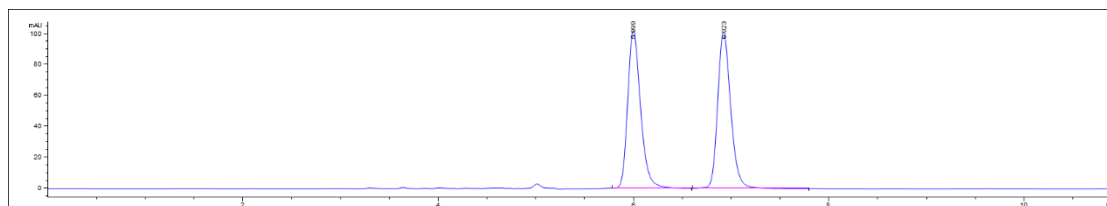

| # | 时间    | 峰面积   | 峰高    | 峰宽     | 对称因子  | 峰面积 %  | 类型 |
|---|-------|-------|-------|--------|-------|--------|----|
| 1 | 5.999 | 938.3 | 102.3 | 0.141  | 0.723 | 49.909 | BB |
| 2 | 6.923 | 941.7 | 101.6 | 0.1441 | 0.763 | 50.091 | BB |

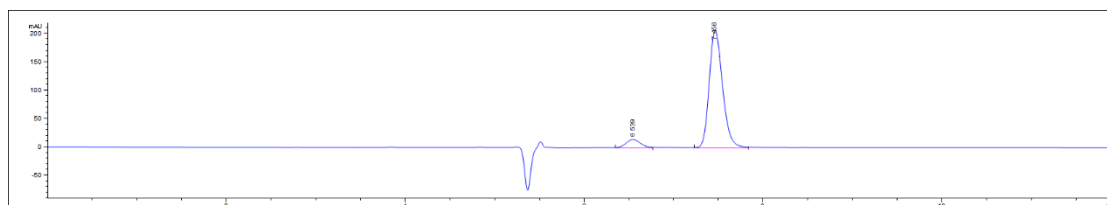

| # | 时间    | 峰面积    | 峰高   | 峰宽     | 对称因子  | 峰面积 %  | 类型 |
|---|-------|--------|------|--------|-------|--------|----|
| 1 | 6.539 | 173.9  | 14.9 | 0.1947 | 0.892 | 7.473  | MM |
| 2 | 7.456 | 2152.7 | 207  | 0.1733 | 0.772 | 92.527 | MM |

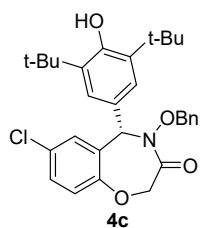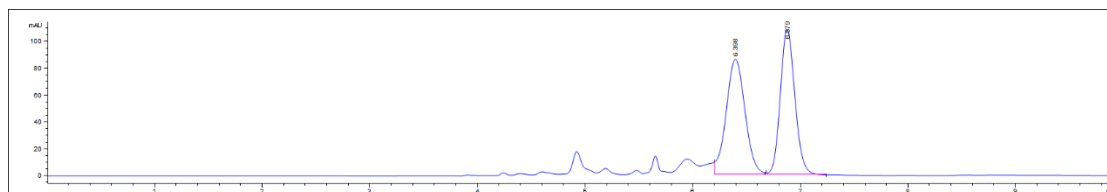

| # | 时间    | 峰面积    | 峰高    | 峰宽     | 对称因子  | 峰面积 %  | 类型 |
|---|-------|--------|-------|--------|-------|--------|----|
| 1 | 6.398 | 1045.2 | 85.7  | 0.2033 | 0.938 | 50.666 | MM |
| 2 | 6.879 | 1017.7 | 108.2 | 0.1457 | 0.85  | 49.334 | VB |

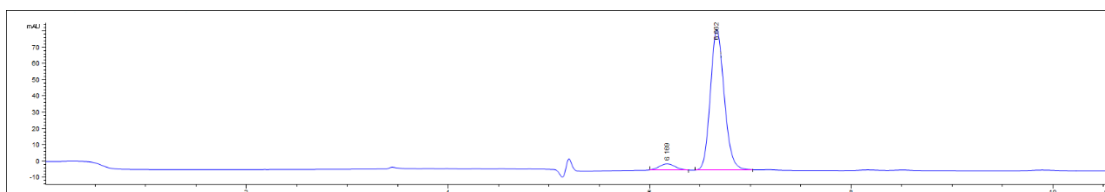

| # | 时间    | 峰面积   | 峰高  | 峰宽     | 对称因子  | 峰面积 %  | 类型 |
|---|-------|-------|-----|--------|-------|--------|----|
| 1 | 6.169 | 42.5  | 3.8 | 0.1853 | 0.939 | 4.883  | MM |
| 2 | 6.662 | 827.7 | 86  | 0.1604 | 0.837 | 95.117 | MM |

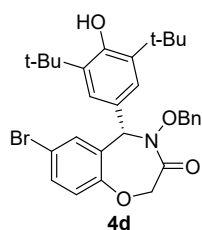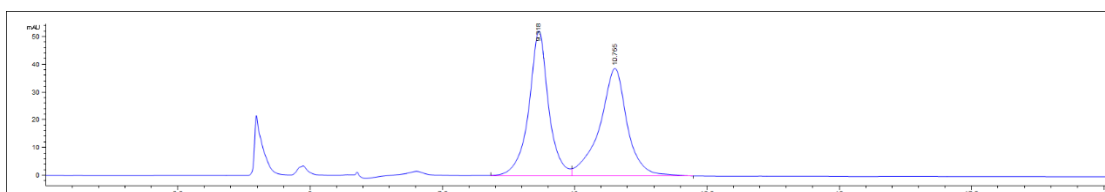

| # | 时间     | 峰面积    | 峰高   | 峰宽     | 对称因子  | 峰面积 %  | 类型 |
|---|--------|--------|------|--------|-------|--------|----|
| 1 | 9.318  | 1379.6 | 52.3 | 0.4395 | 0     | 49.259 | MF |
| 2 | 10.755 | 1421.1 | 38.8 | 0.6102 | 1.172 | 50.741 | FM |

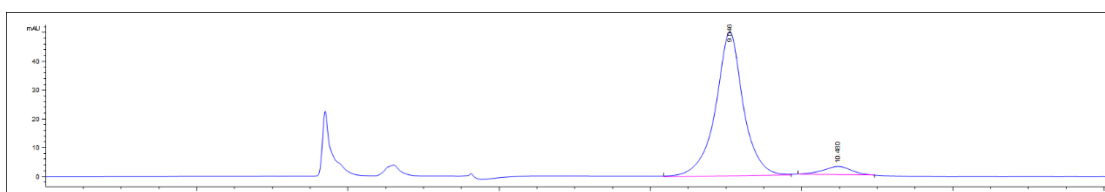

| # | 时间    | 峰面积    | 峰高   | 峰宽     | 对称因子  | 峰面积 %  | 类型 |
|---|-------|--------|------|--------|-------|--------|----|
| 1 | 9.046 | 1281.6 | 49.9 | 0.4279 | 1.038 | 93.944 | MM |
| 2 | 10.48 | 82.6   | 3    | 0.4662 | 1.13  | 6.056  | MM |

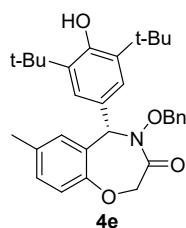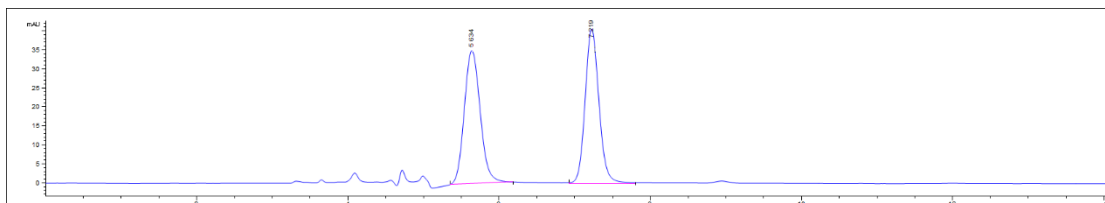

| # | 时间    | 峰面积   | 峰高   | 峰宽     | 对称因子  | 峰面积 %  | 类型 |
|---|-------|-------|------|--------|-------|--------|----|
| 1 | 5.634 | 514.4 | 35.1 | 0.2444 | 0.864 | 49.586 | MM |
| 2 | 7.219 | 523   | 40.8 | 0.2138 | 0.858 | 50.414 | MM |

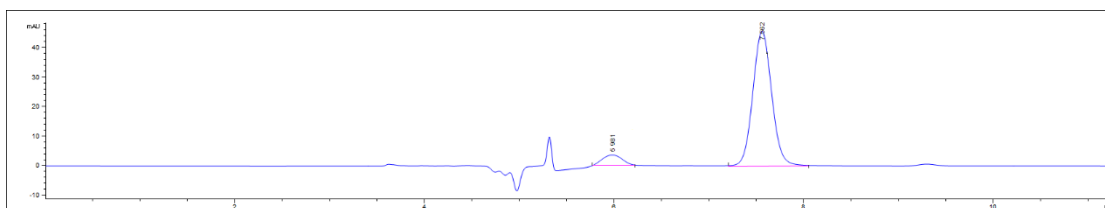

| # | 时间    | 峰面积   | 峰高  | 峰宽     | 对称因子  | 峰面积 %  | 类型 |
|---|-------|-------|-----|--------|-------|--------|----|
| 1 | 5.981 | 52.6  | 3.6 | 0.2453 | 0.96  | 7.522  | MM |
| 2 | 7.562 | 646.8 | 46  | 0.2343 | 0.923 | 92.478 | MM |

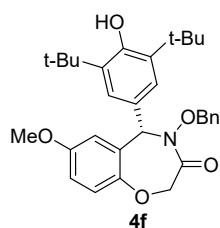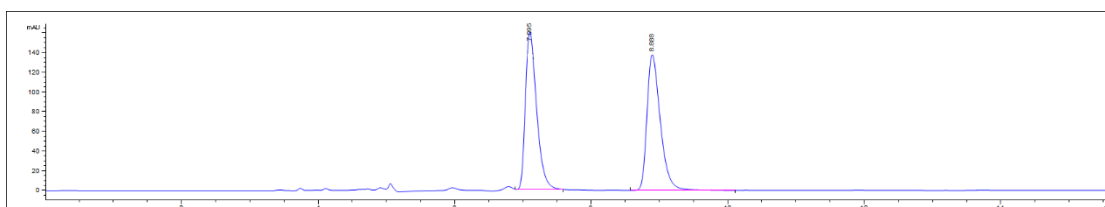

| # | 时间    | 峰面积    | 峰高    | 峰宽     | 对称因子  | 峰面积 %  | 类型 |
|---|-------|--------|-------|--------|-------|--------|----|
| 1 | 7.095 | 1844   | 160.6 | 0.1914 | 0.63  | 49.656 | MM |
| 2 | 8.888 | 1869.6 | 137.6 | 0.2085 | 0.608 | 50.344 | BB |

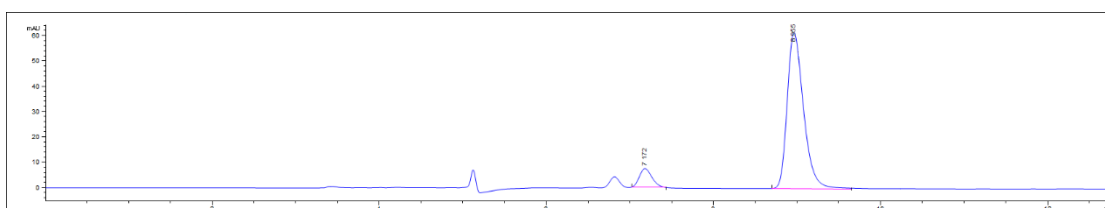

| # | 时间    | 峰面积   | 峰高   | 峰宽     | 对称因子  | 峰面积 %  | 类型 |
|---|-------|-------|------|--------|-------|--------|----|
| 1 | 7.172 | 80.6  | 7.5  | 0.1783 | 0.785 | 8.749  | MM |
| 2 | 8.955 | 840.4 | 61.5 | 0.2276 | 0.685 | 91.251 | MM |

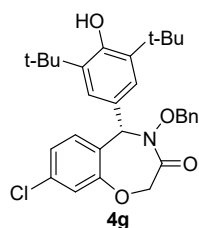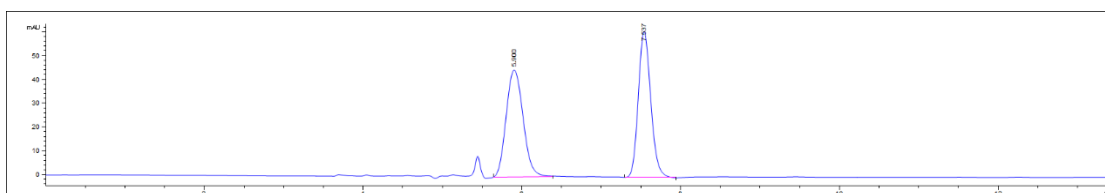

| # | 时间    | 峰面积   | 峰高   | 峰宽     | 对称因子  | 峰面积 %  | 类型 |
|---|-------|-------|------|--------|-------|--------|----|
| 1 | 5.9   | 673.9 | 45.1 | 0.2488 | 0.865 | 50.114 | MM |
| 2 | 7.537 | 670.8 | 61.4 | 0.1674 | 0.825 | 49.886 | BB |

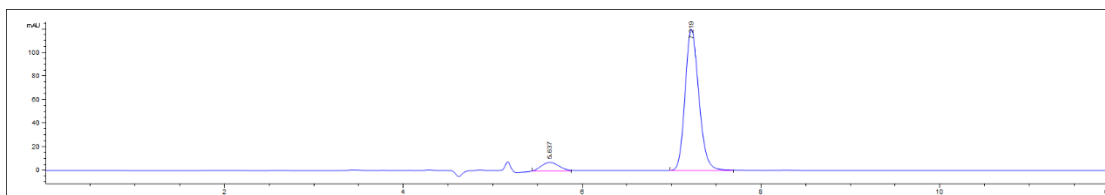

| # | 时间    | 峰面积    | 峰高    | 峰宽     | 对称因子  | 峰面积 %  | 类型 |
|---|-------|--------|-------|--------|-------|--------|----|
| 1 | 5.637 | 110    | 7.6   | 0.2405 | 0.858 | 7.850  | MM |
| 2 | 7.219 | 1291.6 | 120.1 | 0.1792 | 0.807 | 92.150 | MM |

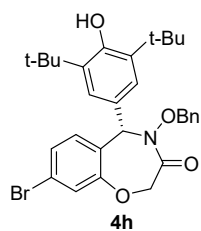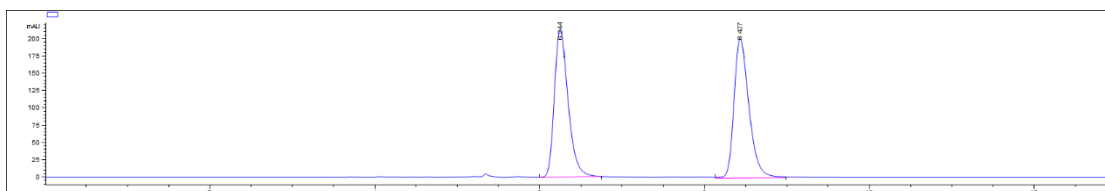

| # | 时间    | 峰面积    | 峰高    | 峰宽     | 对称因子  | 峰面积 %  | 类型 |
|---|-------|--------|-------|--------|-------|--------|----|
| 1 | 6.244 | 2480.5 | 212.9 | 0.1941 | 0.702 | 49.395 | MM |
| 2 | 8.427 | 2541.3 | 201.7 | 0.21   | 0.686 | 50.605 | MM |

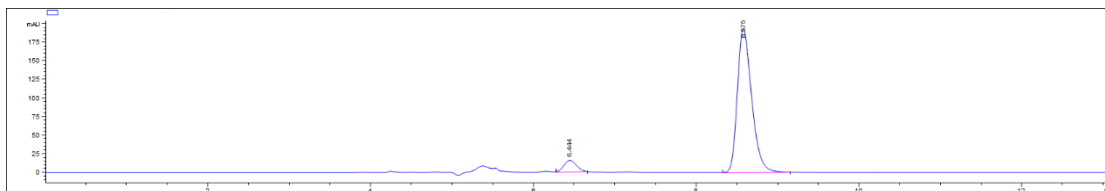

| # | 时间    | 峰面积    | 峰高   | 峰宽     | 对称因子  | 峰面积 %  | 类型 |
|---|-------|--------|------|--------|-------|--------|----|
| 1 | 6.444 | 180.6  | 16.2 | 0.1858 | 0.882 | 6.959  | MM |
| 2 | 8.575 | 2414.7 | 195  | 0.2064 | 0.691 | 93.041 | MM |

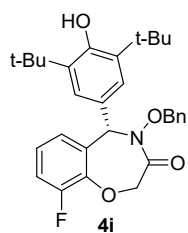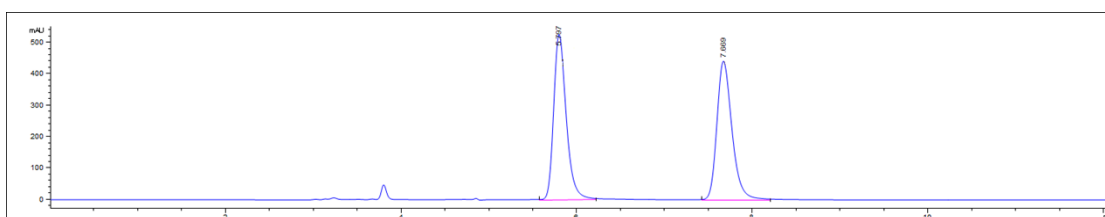



| # | 时间    | 峰面积    | 峰高    | 峰宽     | 对称因子  | 峰面积 %  | 类型 |
|---|-------|--------|-------|--------|-------|--------|----|
| 1 | 5.797 | 5288.8 | 527.7 | 0.1671 | 0.732 | 49.522 | MM |
| 2 | 7.669 | 5390.9 | 443.6 | 0.2026 | 0.734 | 50.478 | MM |

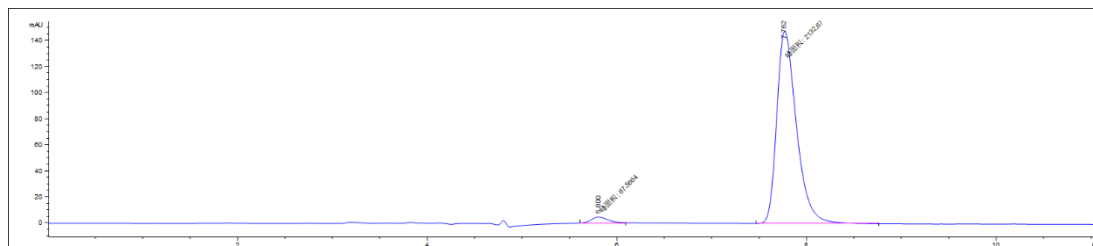

| # | 时间    | 峰面积    | 峰高    | 峰宽     | 对称因子  | 峰面积 %  | 类型 |
|---|-------|--------|-------|--------|-------|--------|----|
| 1 | 5.8   | 67.6   | 5     | 0.2238 | 0.771 | 3.071  | MM |
| 2 | 7.762 | 2132.7 | 147.6 | 0.2408 | 0.656 | 96.929 | MM |

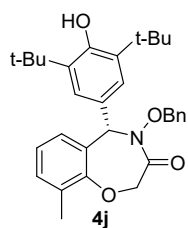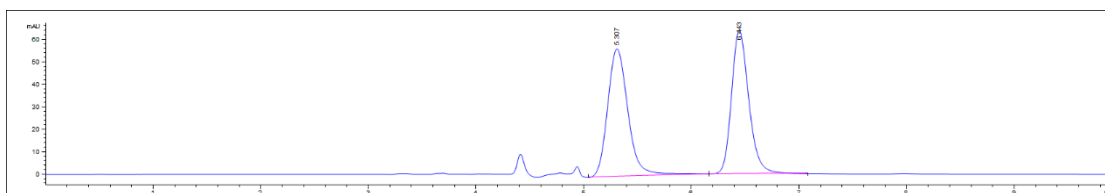

| # | 时间    | 峰面积   | 峰高   | 峰宽     | 对称因子  | 峰面积 %  | 类型 |
|---|-------|-------|------|--------|-------|--------|----|
| 1 | 5.307 | 751.1 | 57   | 0.2038 | 0.783 | 51.322 | BB |
| 2 | 6.443 | 712.4 | 63.9 | 0.1702 | 0.759 | 48.678 | BB |

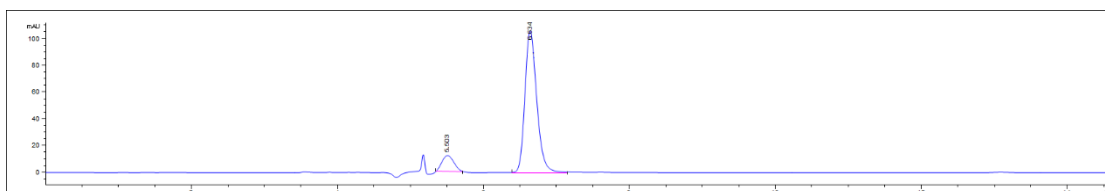

| # | 时间    | 峰面积    | 峰高    | 峰宽     | 对称因子  | 峰面积 %  | 类型 |
|---|-------|--------|-------|--------|-------|--------|----|
| 1 | 5.503 | 136.6  | 12    | 0.1905 | 0.834 | 10.117 | MM |
| 2 | 6.634 | 1213.5 | 106.8 | 0.1894 | 0.762 | 89.883 | MM |

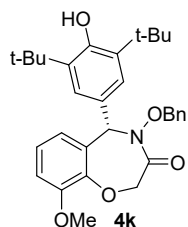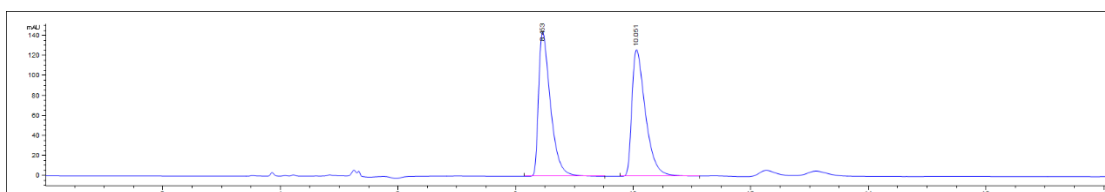

| # | 时间     | 峰面积    | 峰高    | 峰宽     | 对称因子  | 峰面积 %  | 类型 |
|---|--------|--------|-------|--------|-------|--------|----|
| 1 | 8.453  | 2039.2 | 144.8 | 0.2123 | 0.476 | 50.111 | BB |
| 2 | 10.051 | 2030.2 | 126.8 | 0.2427 | 0.487 | 49.889 | BB |

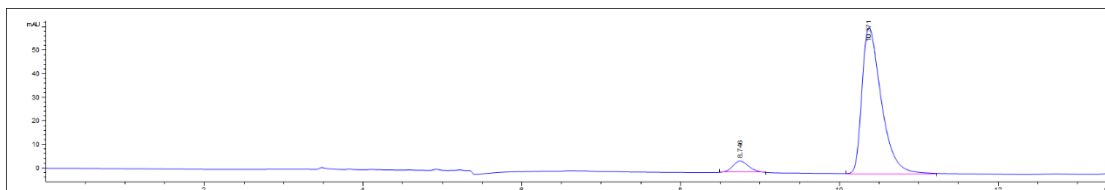

| # | 时间     | 峰面积    | 峰高   | 峰宽     | 对称因子  | 峰面积 %  | 类型 |
|---|--------|--------|------|--------|-------|--------|----|
| 1 | 8.746  | 69.9   | 4.8  | 0.2402 | 0.818 | 6.163  | MM |
| 2 | 10.371 | 1063.6 | 62.1 | 0.2855 | 0.552 | 93.837 | MM |

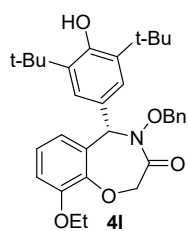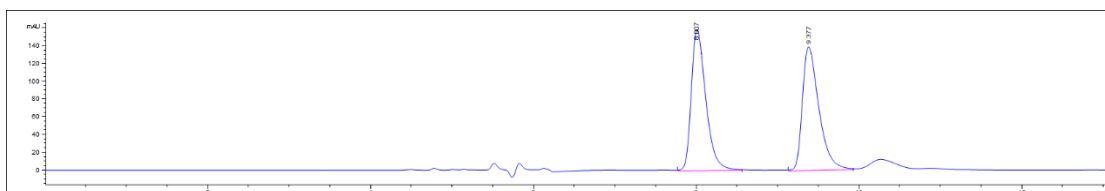

| # | 时间    | 峰面积    | 峰高    | 峰宽     | 对称因子  | 峰面积 %  | 类型 |
|---|-------|--------|-------|--------|-------|--------|----|
| 1 | 8.007 | 1988   | 158.5 | 0.209  | 0.643 | 50.190 | MM |
| 2 | 9.377 | 1972.9 | 139   | 0.2365 | 0.583 | 49.810 | MM |

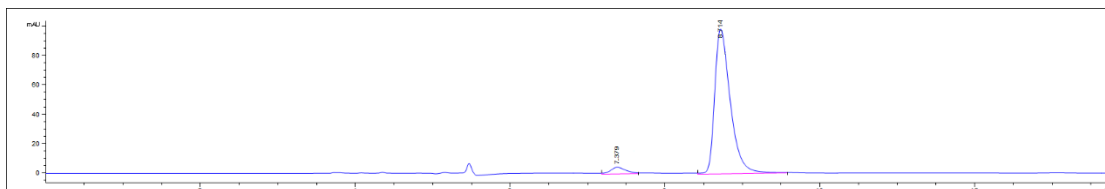

| # | 时间    | 峰面积    | 峰高   | 峰宽     | 对称因子  | 峰面积 %  | 类型 |
|---|-------|--------|------|--------|-------|--------|----|
| 1 | 7.379 | 70.4   | 4.7  | 0.2476 | 0.785 | 4.790  | MM |
| 2 | 8.714 | 1399.8 | 99.2 | 0.2353 | 0.595 | 95.210 | MM |

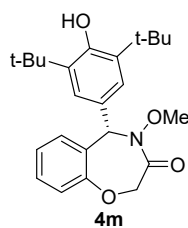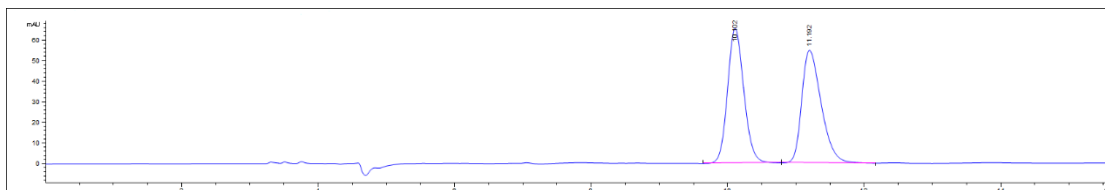

| # | 时间     | 峰面积    | 峰高   | 峰宽     | 对称因子  | 峰面积 %  | 类型 |
|---|--------|--------|------|--------|-------|--------|----|
| 1 | 10.102 | 1088.5 | 65.4 | 0.2581 | 0.83  | 50.108 | BB |
| 2 | 11.192 | 1083.8 | 54.7 | 0.305  | 0.625 | 49.892 | BB |

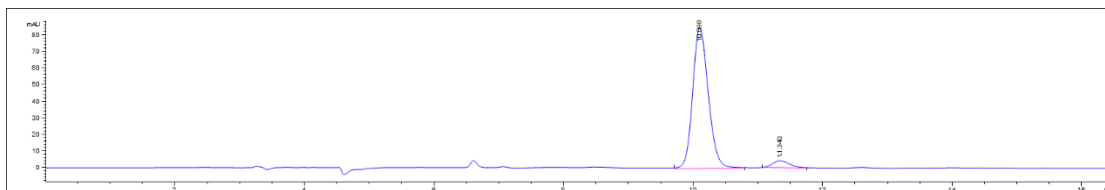

| # | 时间     | 峰面积    | 峰高   | 峰宽     | 对称因子  | 峰面积 %  | 类型 |
|---|--------|--------|------|--------|-------|--------|----|
| 1 | 10.098 | 1435.8 | 84.8 | 0.2821 | 0.798 | 94.651 | MM |
| 2 | 11.34  | 81.1   | 4.2  | 0.3219 | 0.753 | 5.349  | MM |

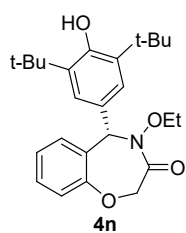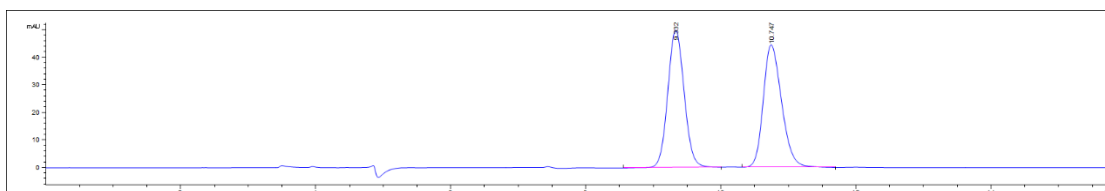

| # | 时间     | 峰面积 | 峰高   | 峰宽     | 对称因子  | 峰面积 %  | 类型 |
|---|--------|-----|------|--------|-------|--------|----|
| 1 | 9.332  | 842 | 49.8 | 0.2634 | 0.901 | 50.059 | BB |
| 2 | 10.747 | 840 | 44.4 | 0.2929 | 0.718 | 49.941 | BB |

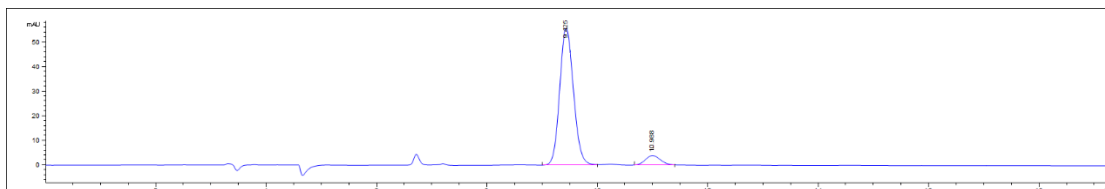

| # | 时间     | 峰面积   | 峰高   | 峰宽     | 对称因子  | 峰面积 %  | 类型 |
|---|--------|-------|------|--------|-------|--------|----|
| 1 | 9.425  | 962.5 | 55.6 | 0.2886 | 0.856 | 93.050 | MM |
| 2 | 10.988 | 71.9  | 3.8  | 0.3131 | 0.868 | 6.950  | MM |

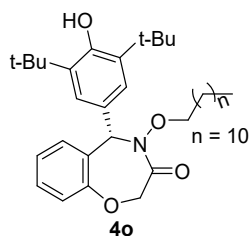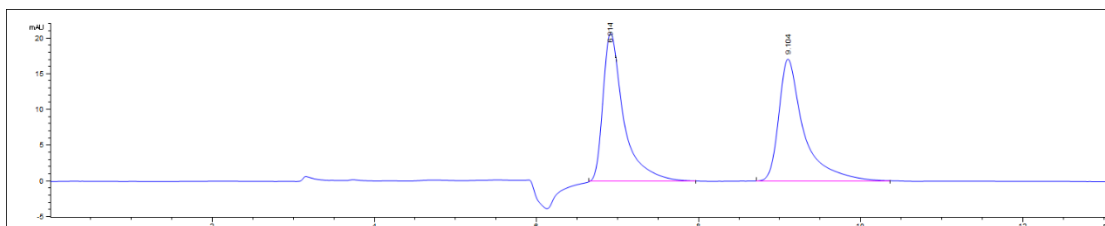

| # | 时间    | 峰面积   | 峰高   | 峰宽     | 对称因子  | 峰面积 %  | 类型 |
|---|-------|-------|------|--------|-------|--------|----|
| 1 | 6.914 | 375.6 | 20.9 | 0.3    | 0.554 | 49.797 | MM |
| 2 | 9.104 | 378.6 | 17.2 | 0.3659 | 0.549 | 50.203 | MM |

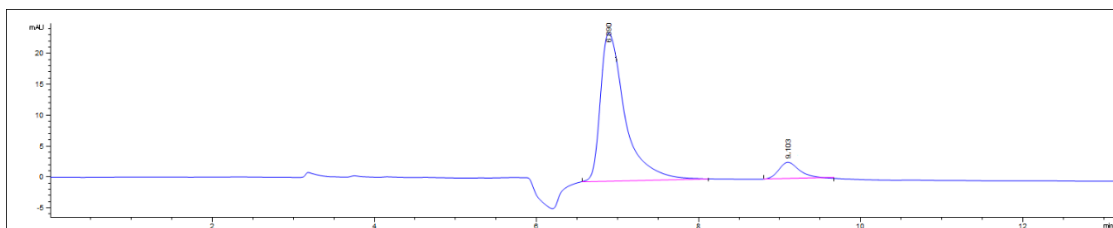

| # | 时间    | 峰面积   | 峰高   | 峰宽     | 对称因子  | 峰面积 %  | 类型 |
|---|-------|-------|------|--------|-------|--------|----|
| 1 | 6.89  | 518.6 | 24.2 | 0.3571 | 0.488 | 91.005 | MM |
| 2 | 9.103 | 51.3  | 2.7  | 0.3118 | 0.746 | 8.995  | MM |

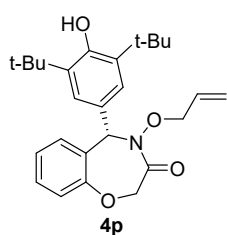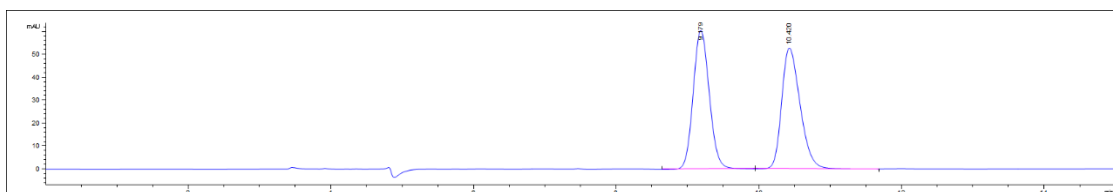

| # | 时间    | 峰面积   | 峰高   | 峰宽     | 对称因子  | 峰面积 %  | 类型 |
|---|-------|-------|------|--------|-------|--------|----|
| 1 | 9.179 | 952   | 60.6 | 0.2453 | 0.863 | 50.181 | BB |
| 2 | 10.42 | 945.1 | 52.7 | 0.2791 | 0.678 | 49.819 | BB |

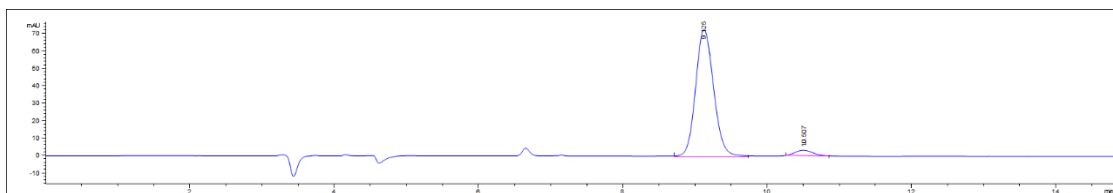

| # | 时间     | 峰面积    | 峰高   | 峰宽     | 对称因子  | 峰面积 %  | 类型 |
|---|--------|--------|------|--------|-------|--------|----|
| 1 | 9.125  | 1284.1 | 73.3 | 0.2921 | 0.849 | 95.389 | MM |
| 2 | 10.507 | 62.1   | 3.3  | 0.3115 | 0.767 | 4.611  | MM |

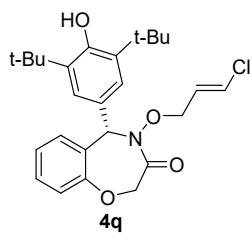

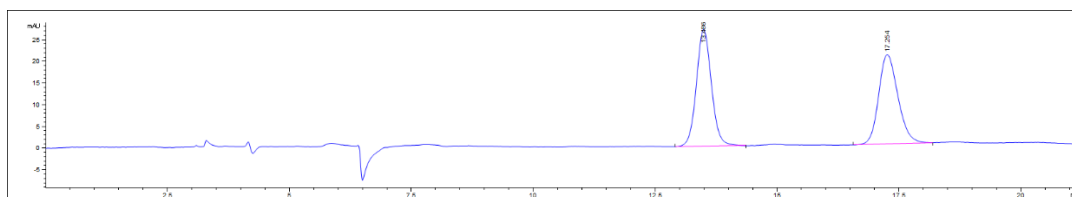

| # | 时间     | 峰面积   | 峰高   | 峰宽     | 对称因子  | 峰面积 %  | 类型 |
|---|--------|-------|------|--------|-------|--------|----|
| 1 | 13.486 | 576.6 | 26.8 | 0.3289 | 0.891 | 50.552 | BB |
| 2 | 17.254 | 564   | 20.5 | 0.4229 | 0.786 | 49.448 | BB |

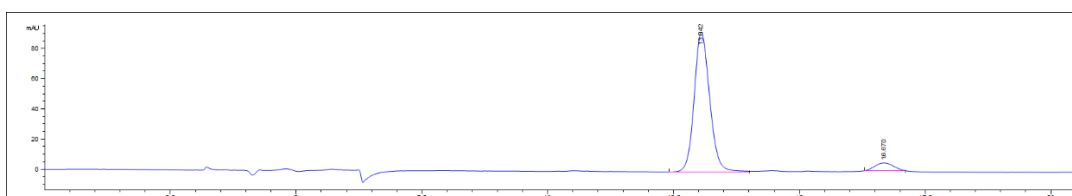

| # | 时间     | 峰面积    | 峰高   | 峰宽     | 对称因子  | 峰面积 %  | 类型 |
|---|--------|--------|------|--------|-------|--------|----|
| 1 | 13.042 | 2020.1 | 93.2 | 0.3613 | 0.815 | 93.181 | MM |
| 2 | 16.67  | 147.8  | 5.5  | 0.452  | 0.9   | 6.819  | MM |

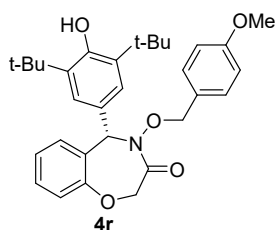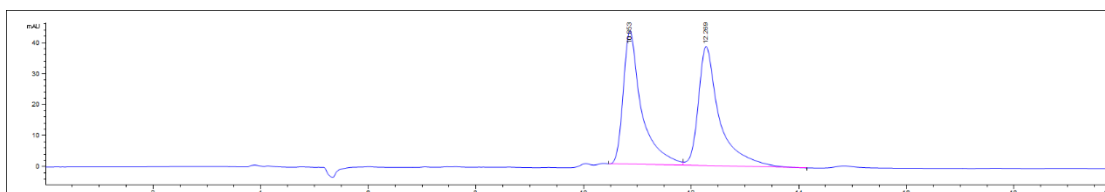

| # | 时间     | 峰面积    | 峰高   | 峰宽     | 对称因子  | 峰面积 %  | 类型 |
|---|--------|--------|------|--------|-------|--------|----|
| 1 | 10.853 | 1021.7 | 43.1 | 0.3423 | 0.519 | 49.070 | BV |
| 2 | 12.269 | 1060.5 | 38.6 | 0.3943 | 0.527 | 50.930 | VB |

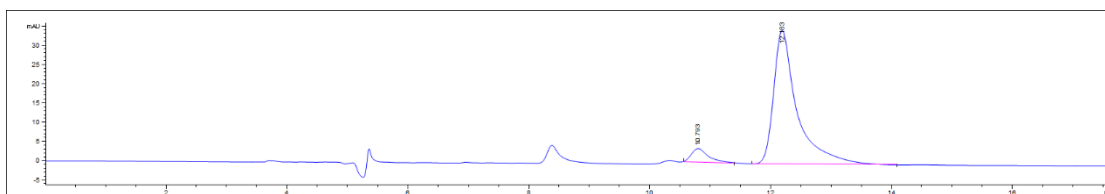

| # | 时间     | 峰面积   | 峰高   | 峰宽     | 对称因子  | 峰面积 %  | 类型 |
|---|--------|-------|------|--------|-------|--------|----|
| 1 | 10.793 | 71.5  | 3.6  | 0.3345 | 0.605 | 7.074  | MM |
| 2 | 12.183 | 939.8 | 34.7 | 0.3876 | 0.508 | 92.926 | BB |

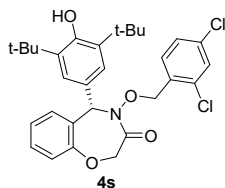

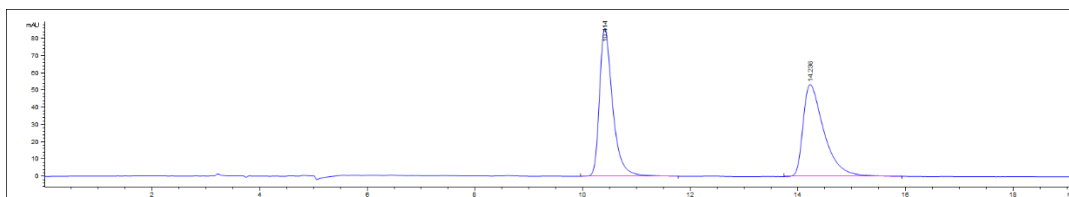

| # | 时间     | 峰面积    | 峰高   | 峰宽     | 对称因子  | 峰面积 %  | 类型 |
|---|--------|--------|------|--------|-------|--------|----|
| 1 | 10.414 | 1449.9 | 85.5 | 0.2558 | 0.615 | 50.177 | BB |
| 2 | 14.236 | 1439.6 | 53.1 | 0.4043 | 0.478 | 49.823 | BB |

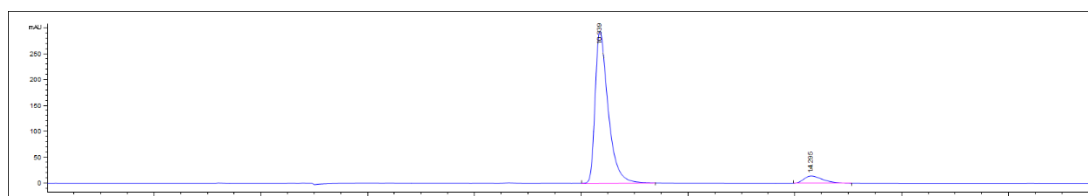

| # | 时间     | 峰面积    | 峰高    | 峰宽     | 对称因子  | 峰面积 %  | 类型 |
|---|--------|--------|-------|--------|-------|--------|----|
| 1 | 10.339 | 5035.8 | 294.2 | 0.2853 | 0.558 | 93.114 | MM |
| 2 | 14.295 | 372.4  | 14.5  | 0.4293 | 0.62  | 6.886  | MM |

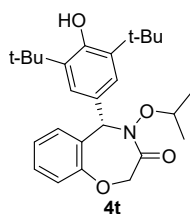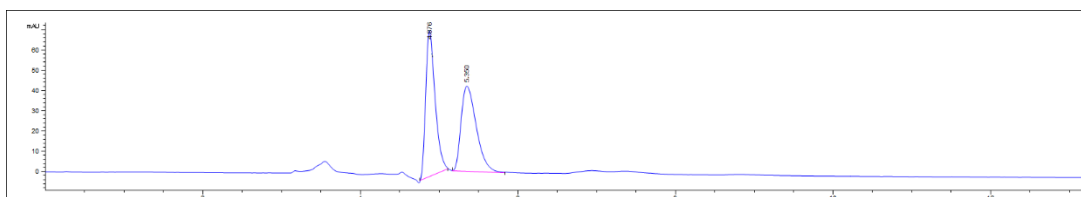

| # | 时间    | 峰面积   | 峰高   | 峰宽     | 对称因子  | 峰面积 %  | 类型 |
|---|-------|-------|------|--------|-------|--------|----|
| 1 | 4.876 | 601.8 | 72.5 | 0.1384 | 0.659 | 51.432 | MM |
| 2 | 5.35  | 568.3 | 42.1 | 0.2248 | 0.592 | 48.568 | MM |

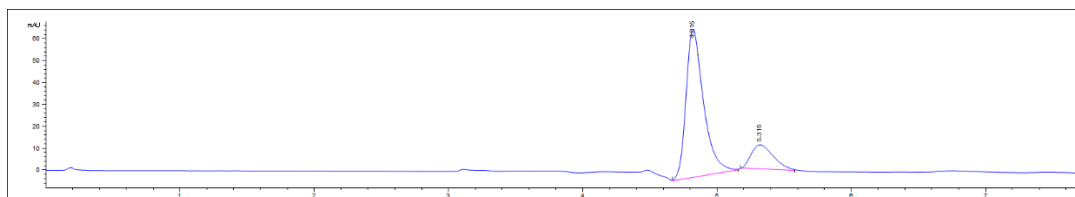

| # | 时间    | 峰面积   | 峰高 | 峰宽     | 对称因子  | 峰面积 %  | 类型 |
|---|-------|-------|----|--------|-------|--------|----|
| 1 | 4.815 | 618.3 | 68 | 0.1515 | 0.64  | 82.961 | MM |
| 2 | 5.315 | 127   | 11 | 0.1929 | 0.646 | 17.039 | MM |

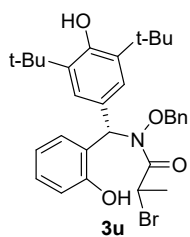

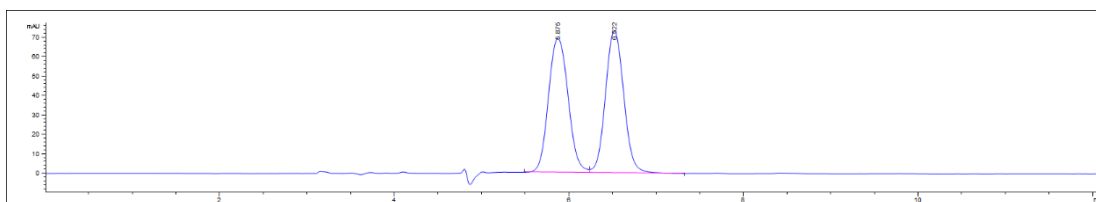

| # | 时间    | 峰面积    | 峰高   | 峰宽     | 对称因子  | 峰面积 %  | 类型 |
|---|-------|--------|------|--------|-------|--------|----|
| 1 | 5.875 | 1085.1 | 69.2 | 0.251  | 0.878 | 50.301 | BV |
| 2 | 6.522 | 1072.1 | 73.3 | 0.2306 | 0.888 | 49.699 | VB |

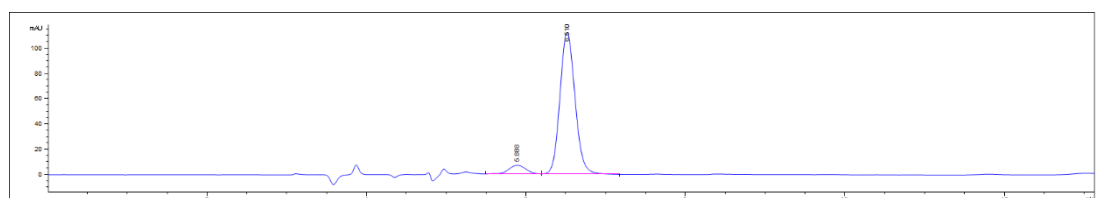

| # | 时间    | 峰面积    | 峰高    | 峰宽     | 对称因子  | 峰面积 %  | 类型 |
|---|-------|--------|-------|--------|-------|--------|----|
| 1 | 5.888 | 104    | 6.9   | 0.2423 | 0.997 | 6.558  | BV |
| 2 | 6.51  | 1481.9 | 112.4 | 0.2059 | 0.854 | 93.442 | VB |

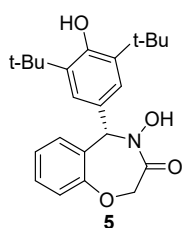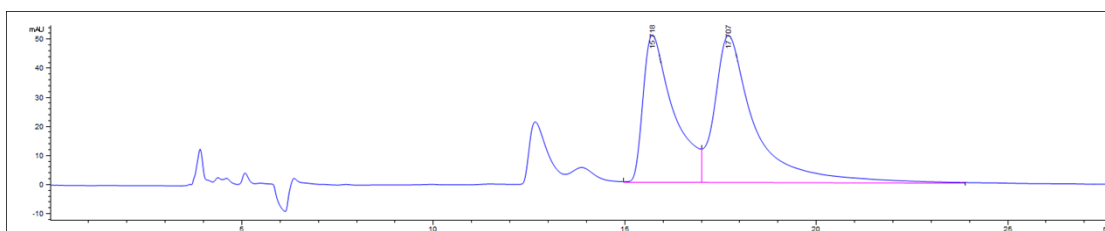

| # | 时间     | 峰面积    | 峰高   | 峰宽     | 对称因子  | 峰面积 %  | 类型 |
|---|--------|--------|------|--------|-------|--------|----|
| 1 | 15.718 | 3078.1 | 51   | 1.0054 | 0     | 46.247 | MF |
| 2 | 17.707 | 3577.7 | 50.9 | 1.1717 | 0.388 | 53.753 | FM |

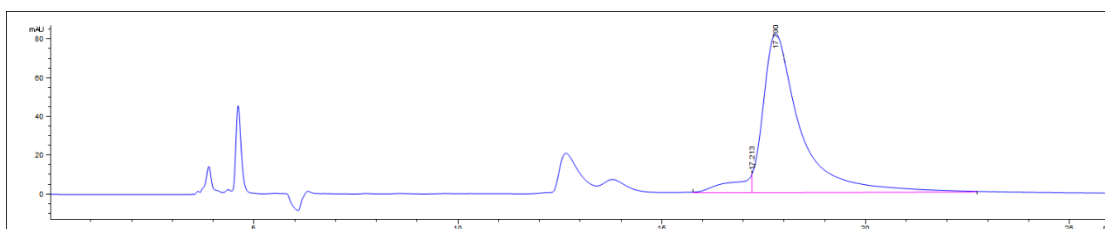

| # | 时间     | 峰面积    | 峰高   | 峰宽     | 对称因子    | 峰面积 %  | 类型 |
|---|--------|--------|------|--------|---------|--------|----|
| 1 | 17.213 | 360.7  | 9.8  | 0.6108 | 7372.39 | 6.507  | MF |
| 2 | 17.79  | 5182.7 | 81.9 | 1.0542 | 0.468   | 93.493 | FM |

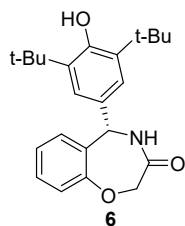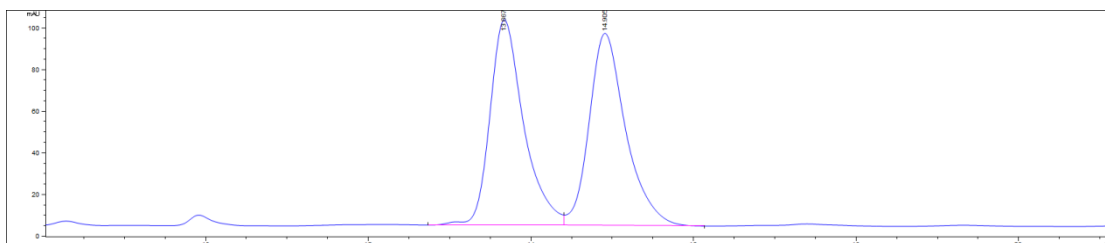

| # | 时间     | 峰面积    | 峰高   | 峰宽     | 对称因子 | 峰面积 %  | 类型 |
|---|--------|--------|------|--------|------|--------|----|
| 1 | 13.667 | 2844.8 | 98.4 | 0.4314 | 0.7  | 49.675 | BV |
| 2 | 14.905 | 2882   | 91.9 | 0.4697 | 0.72 | 50.325 | VB |

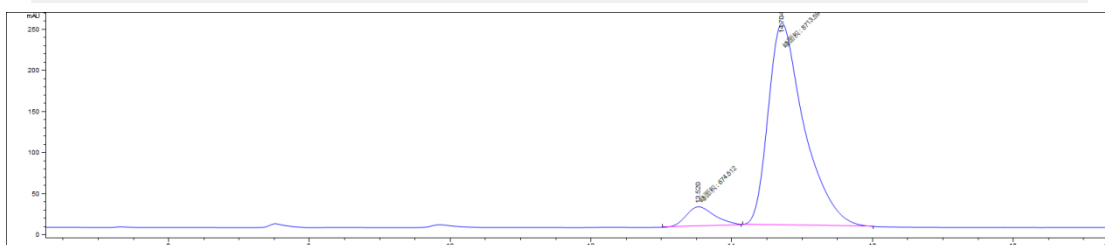

| # | 时间     | 峰面积    | 峰高    | 峰宽     | 对称因子  | 峰面积 %  | 类型 |
|---|--------|--------|-------|--------|-------|--------|----|
| 1 | 13.52  | 674.5  | 23.6  | 0.4764 | 0.709 | 7.185  | MM |
| 2 | 14.704 | 8713.6 | 246.1 | 0.5901 | 0.602 | 92.815 | MM |

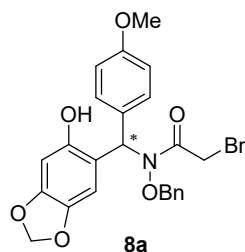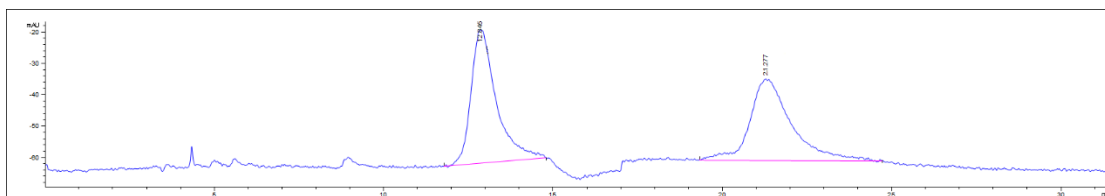

| # | 时间     | 峰面积    | 峰高   | 峰宽     | 对称因子  | 峰面积 %  | 类型 |
|---|--------|--------|------|--------|-------|--------|----|
| 1 | 12.845 | 2238.3 | 42.7 | 0.8728 | 0.569 | 49.632 | MM |
| 2 | 21.277 | 2271.4 | 26.2 | 1.4434 | 0.628 | 50.368 | MM |



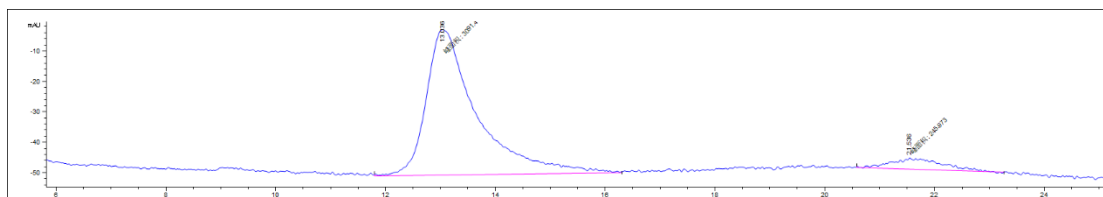

| # | 时间     | 峰面积    | 峰高  | 峰宽     | 对称因子  | 峰面积 %  | 类型 |
|---|--------|--------|-----|--------|-------|--------|----|
| 1 | 13.036 | 3091.4 | 48  | 1.0734 | 0.484 | 92.630 | MM |
| 2 | 21.536 | 246    | 3.8 | 1.0917 | 0.583 | 7.370  | MM |

## 6. NMR spectra of products

$^1\text{H}$  NMR of compound 3a (600 MHz in  $\text{CDCl}_3$ )

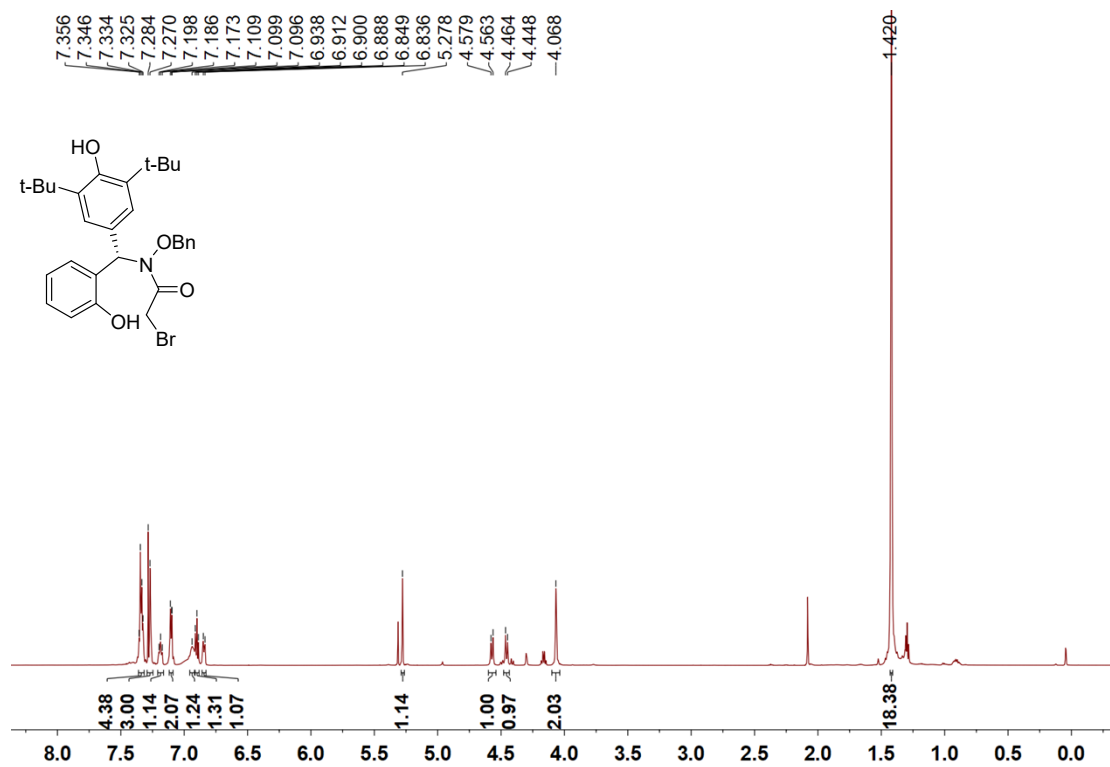

**<sup>13</sup>C NMR of compound 3a (150 MHz in CDCl<sub>3</sub>)**

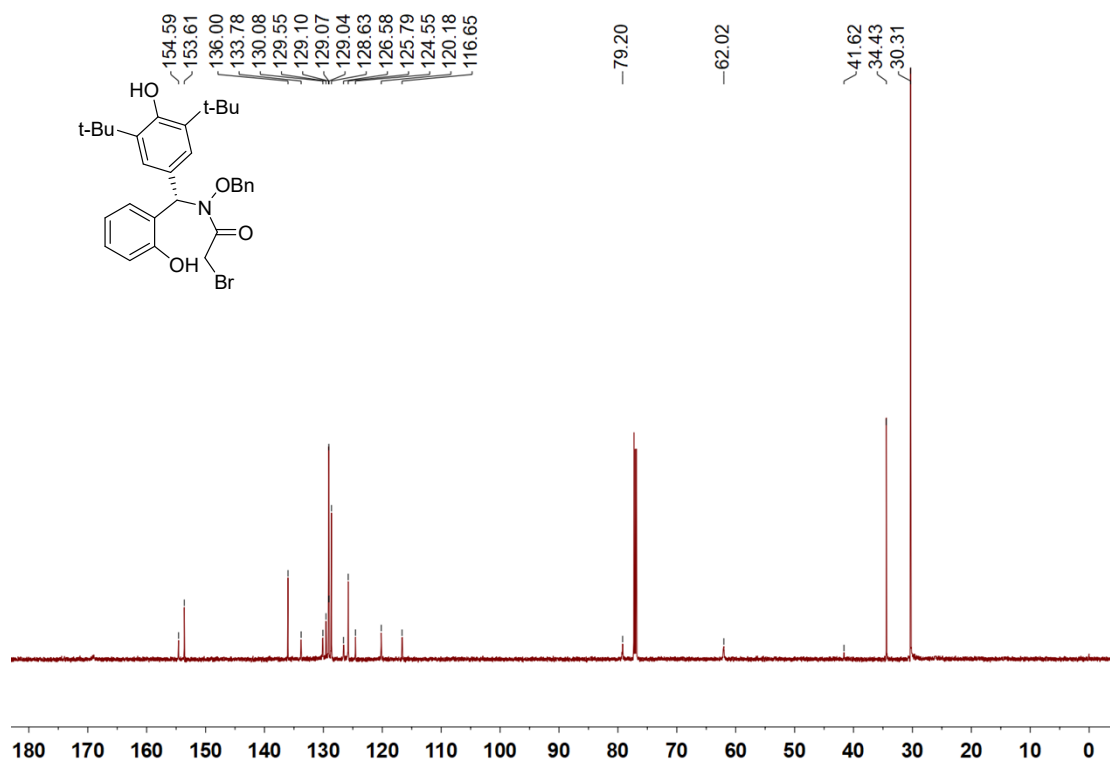

**<sup>1</sup>H NMR of compound 4a (500 MHz in CDCl<sub>3</sub>)**

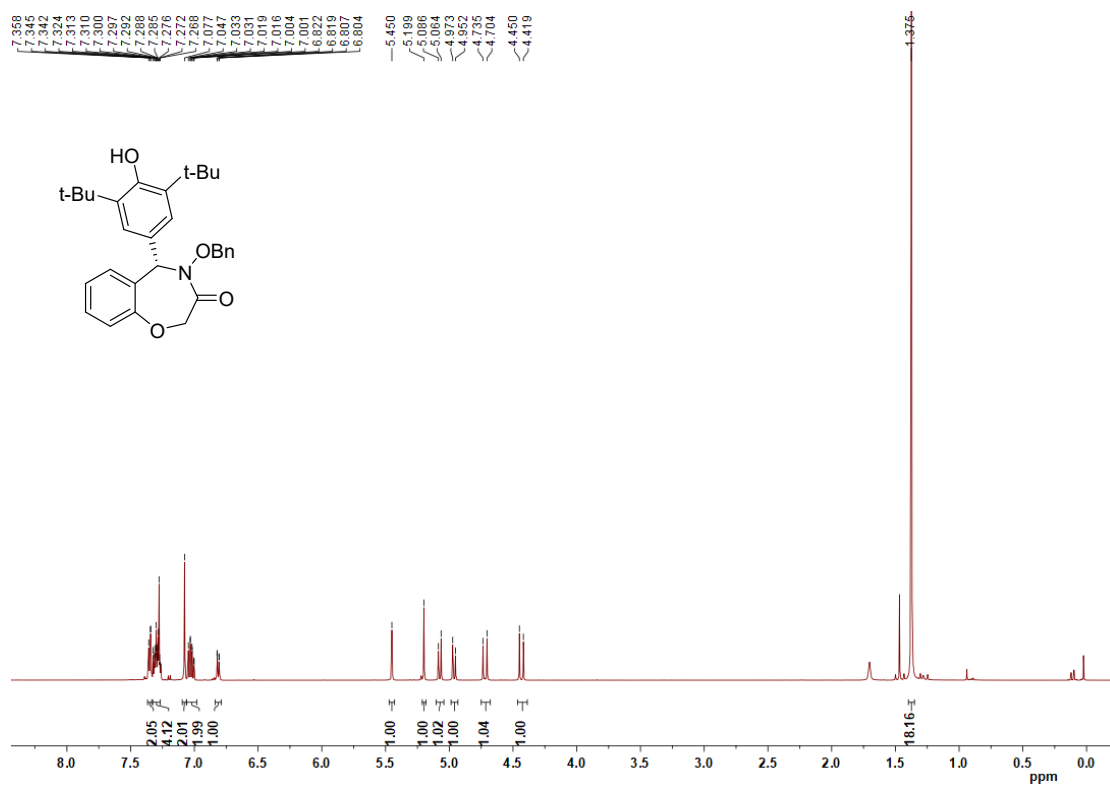

**<sup>13</sup>C NMR of compound 4a (125 MHz in CDCl<sub>3</sub>)**

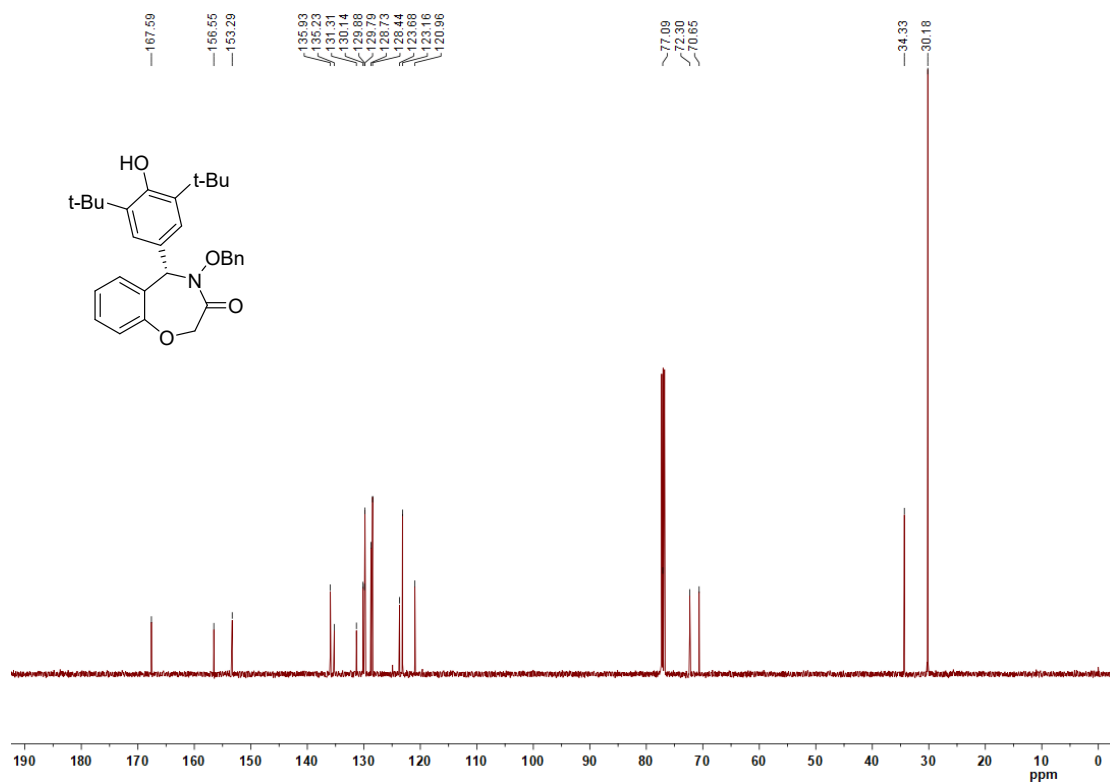

**<sup>1</sup>H NMR of compound 4b (500 MHz in CDCl<sub>3</sub>)**

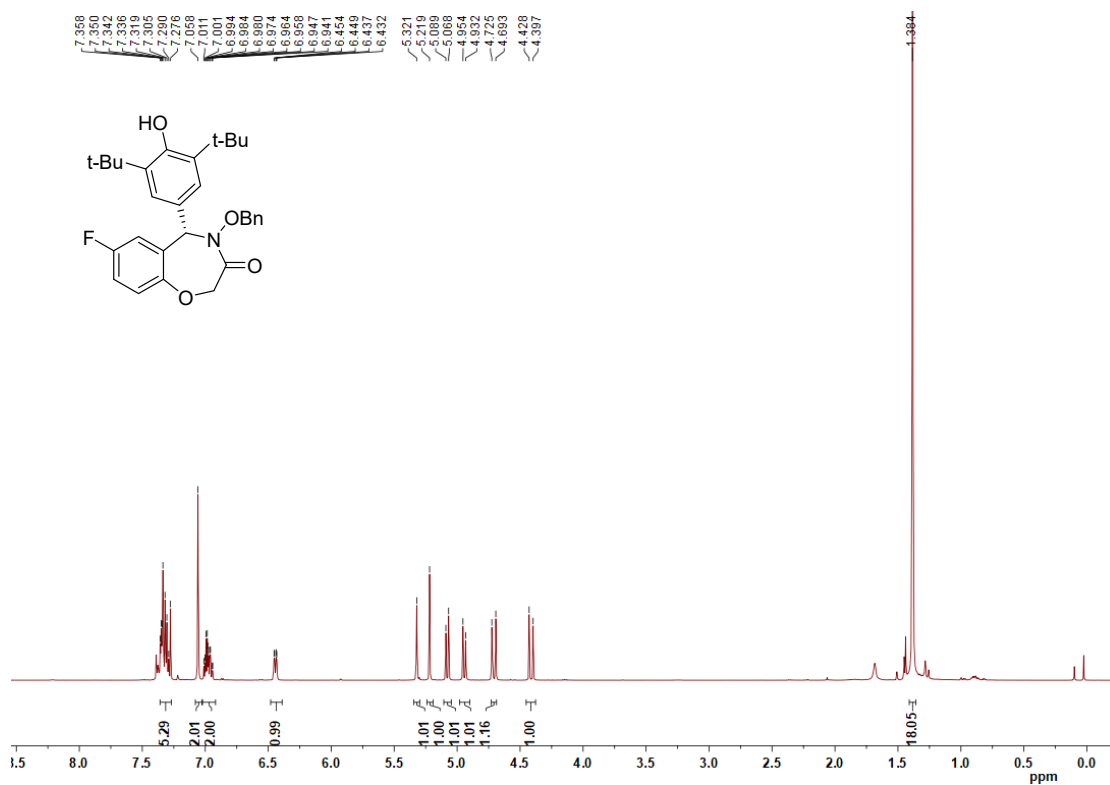

**<sup>13</sup>C NMR of compound 4b (125 MHz in CDCl<sub>3</sub>)**

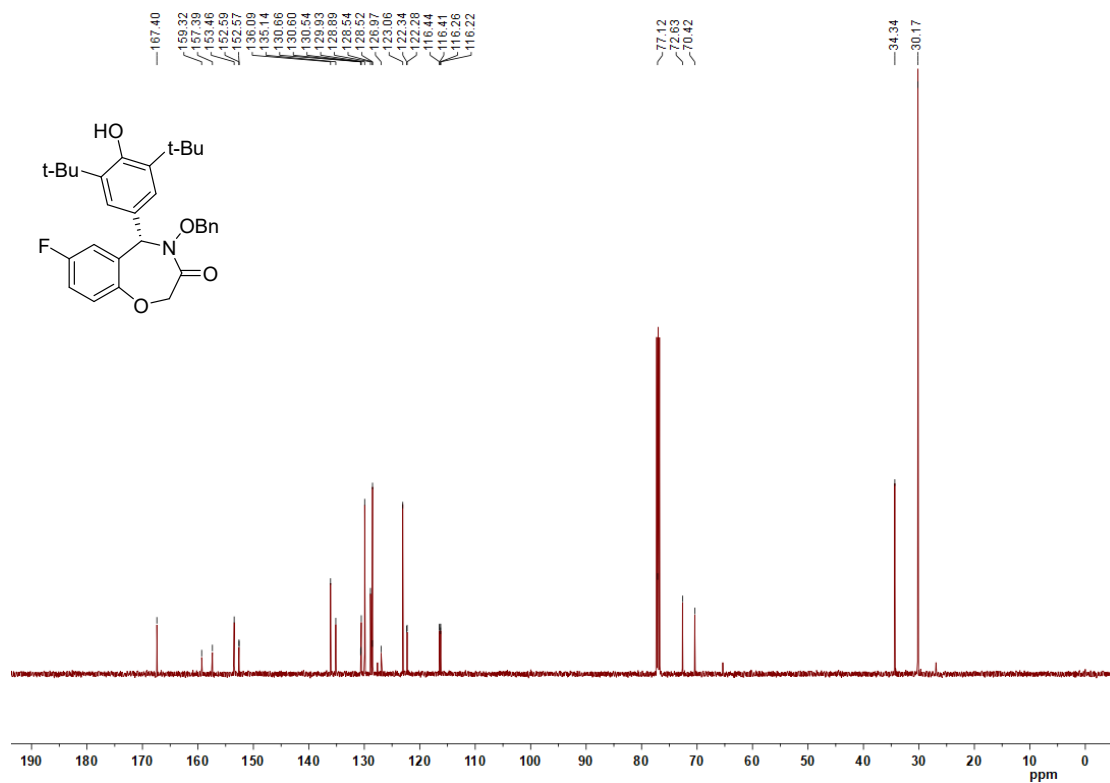

**<sup>1</sup>H NMR of compound 4c (500 MHz in CDCl<sub>3</sub>)**

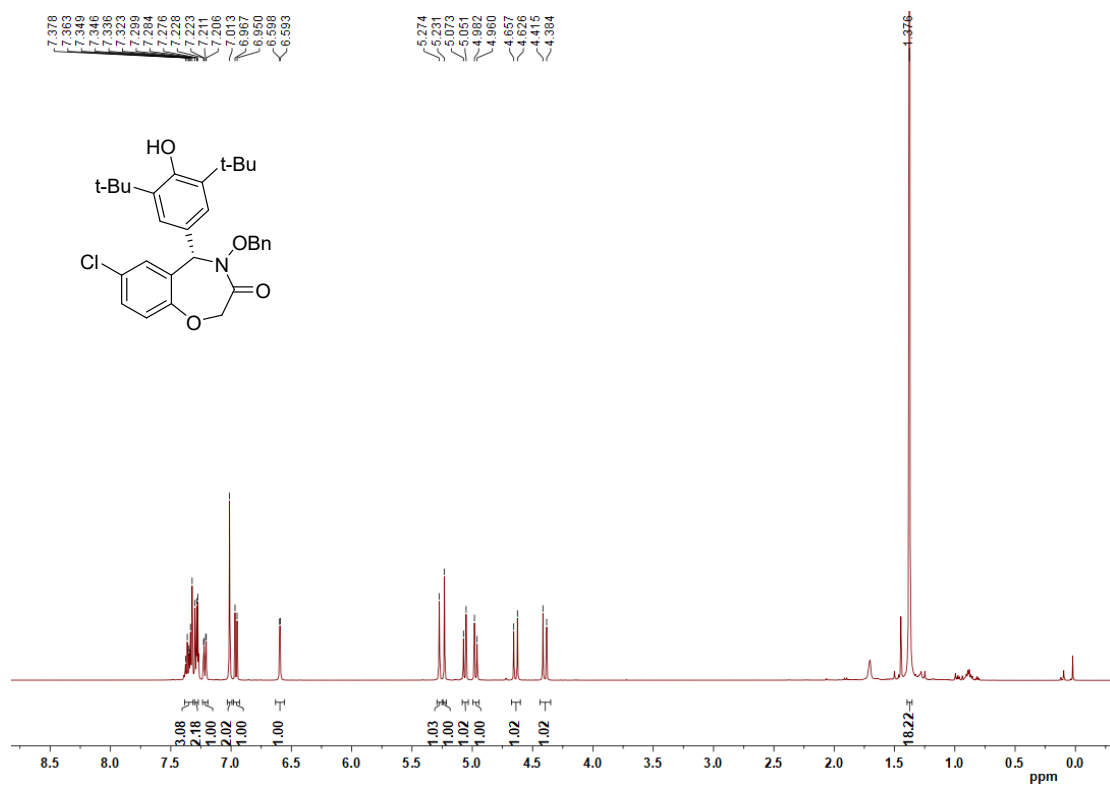

**<sup>13</sup>C NMR of compound 4c (125 MHz in CDCl<sub>3</sub>)**

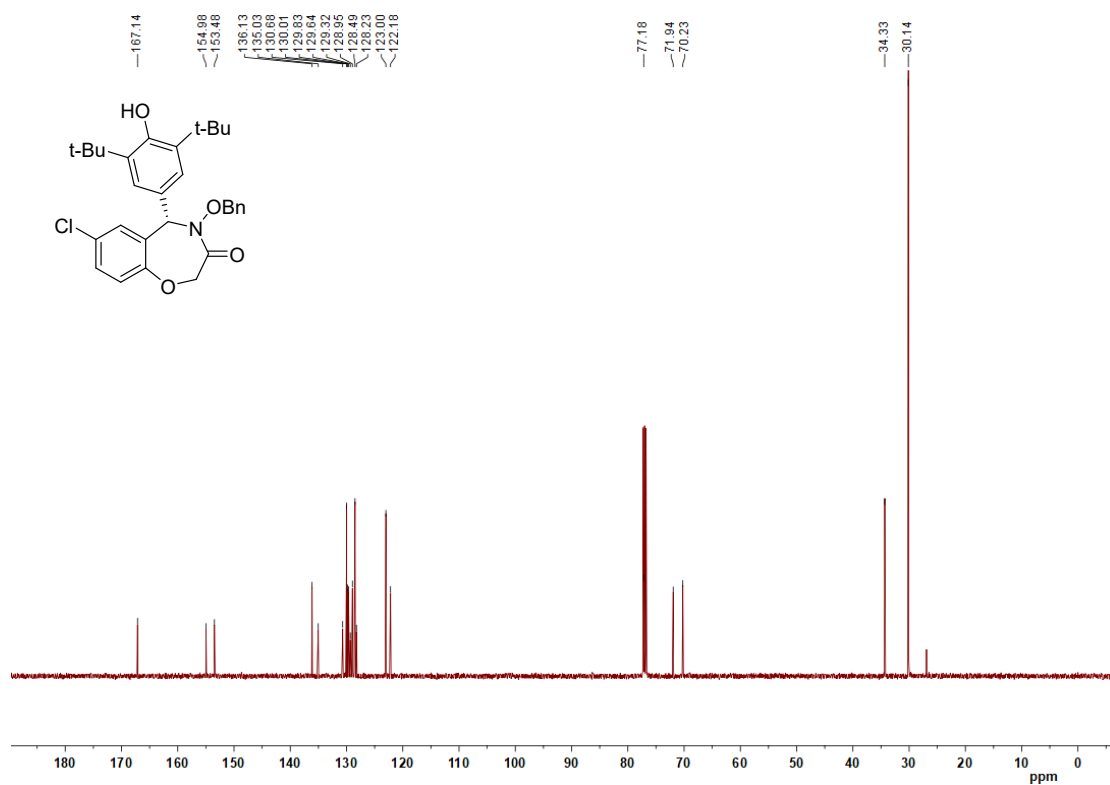

**<sup>1</sup>H NMR of compound 4d (500 MHz in CDCl<sub>3</sub>)**

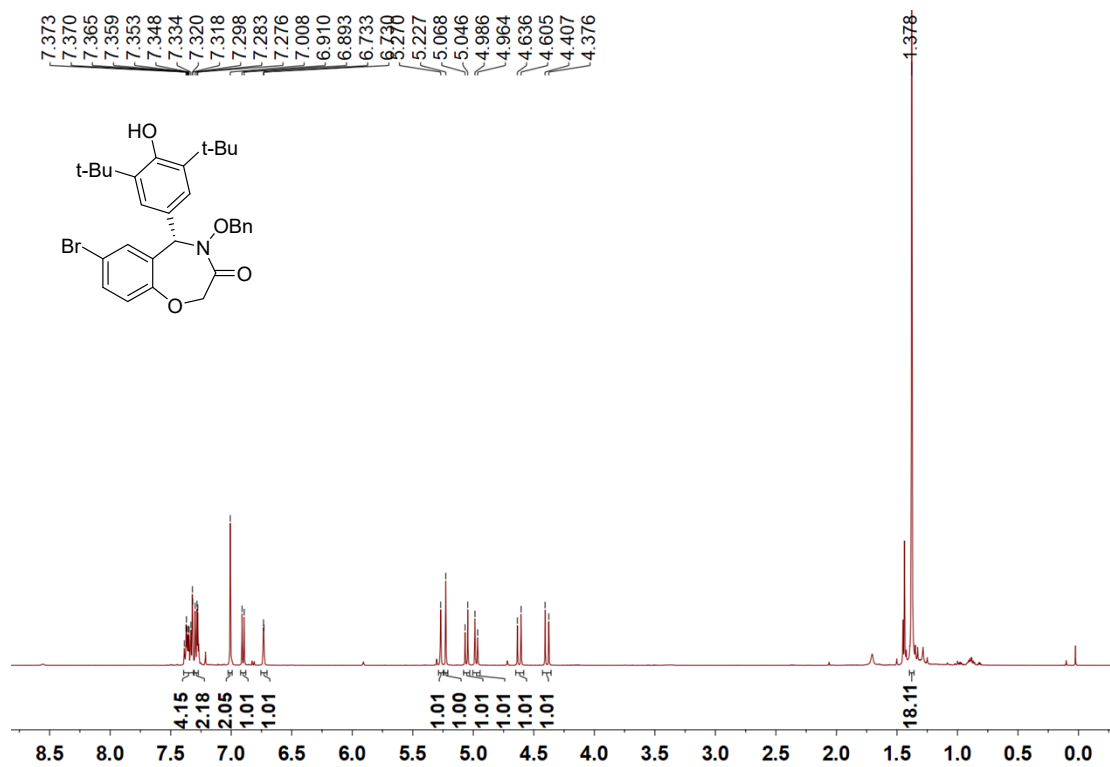

**<sup>13</sup>C NMR of compound 4d (125 MHz in CDCl<sub>3</sub>)**

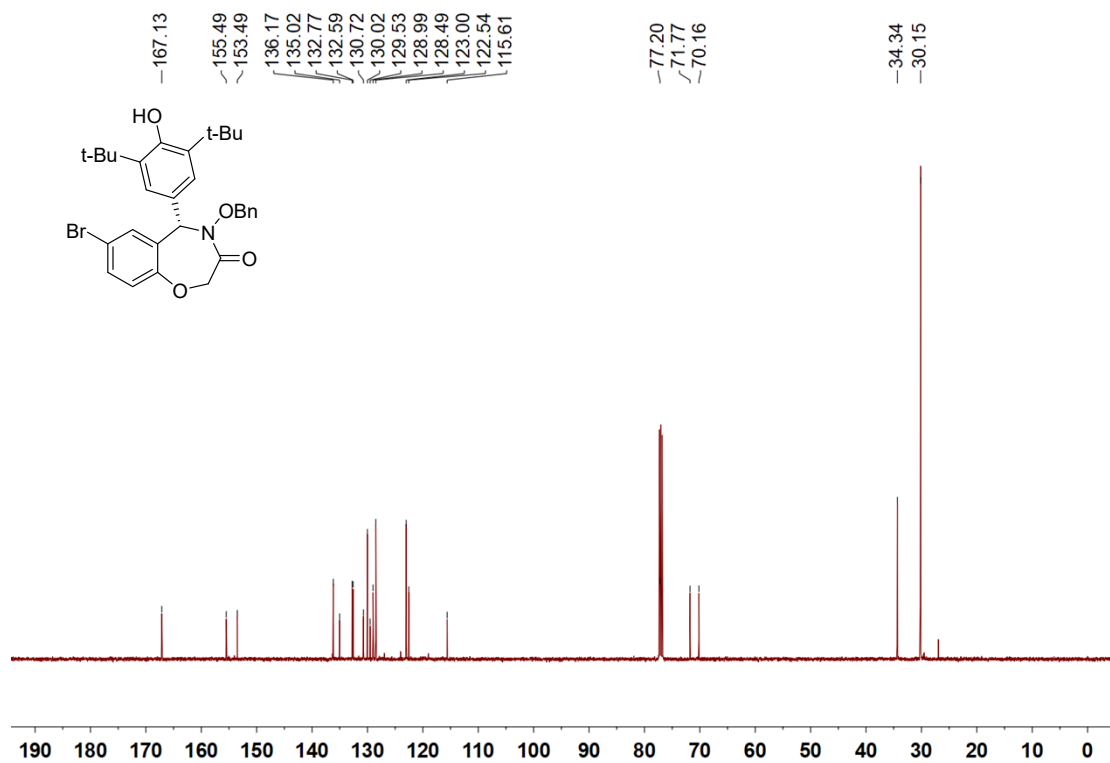

**<sup>1</sup>H NMR of compound 4e (500 MHz in CDCl<sub>3</sub>)**

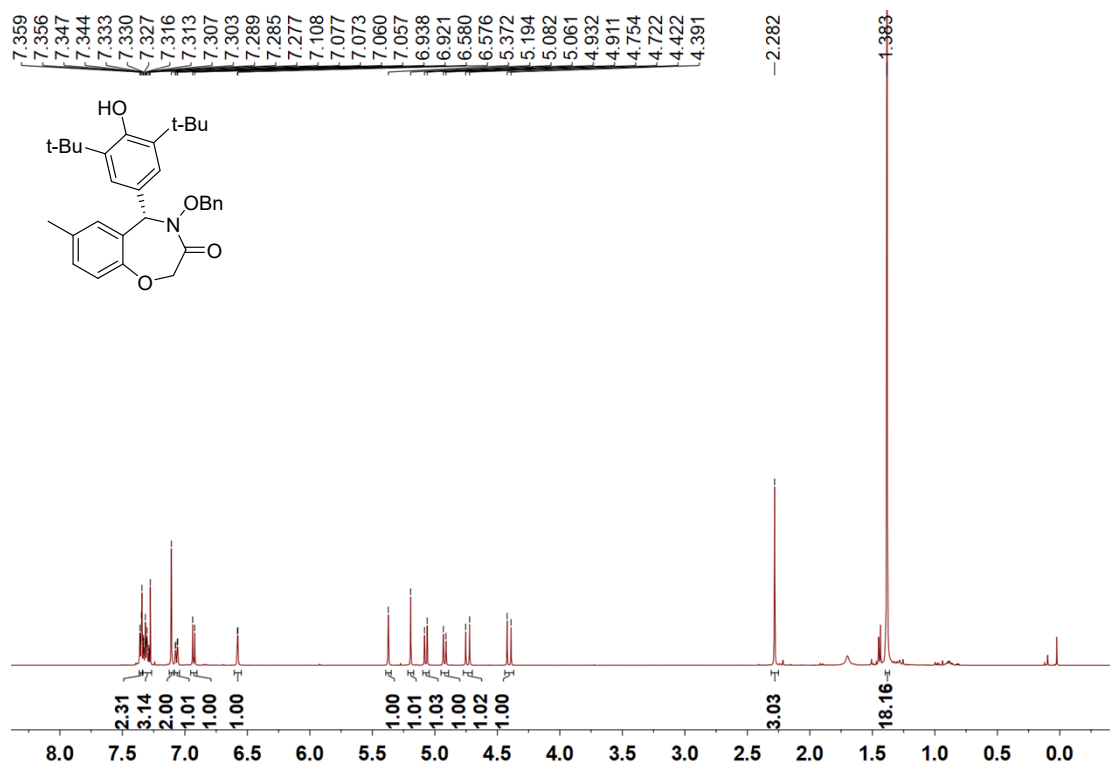

**<sup>13</sup>C NMR of compound 4e (125 MHz in CDCl<sub>3</sub>)**

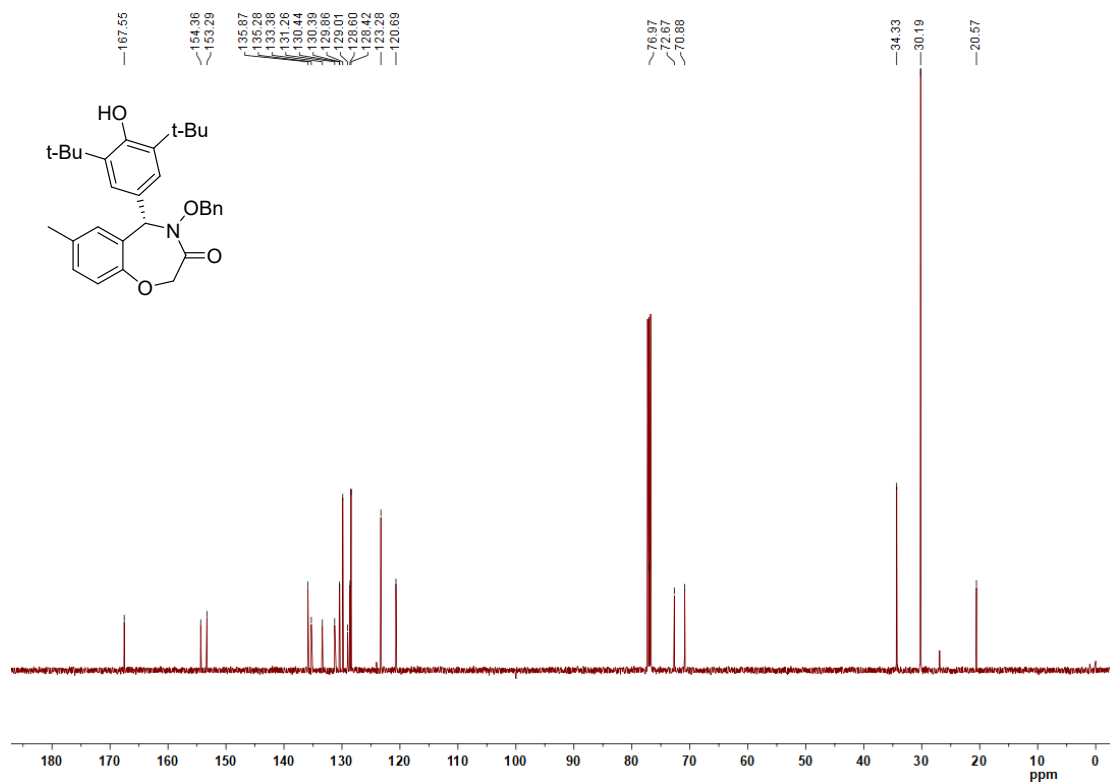

**<sup>1</sup>H NMR of compound 4f (500 MHz in CDCl<sub>3</sub>)**

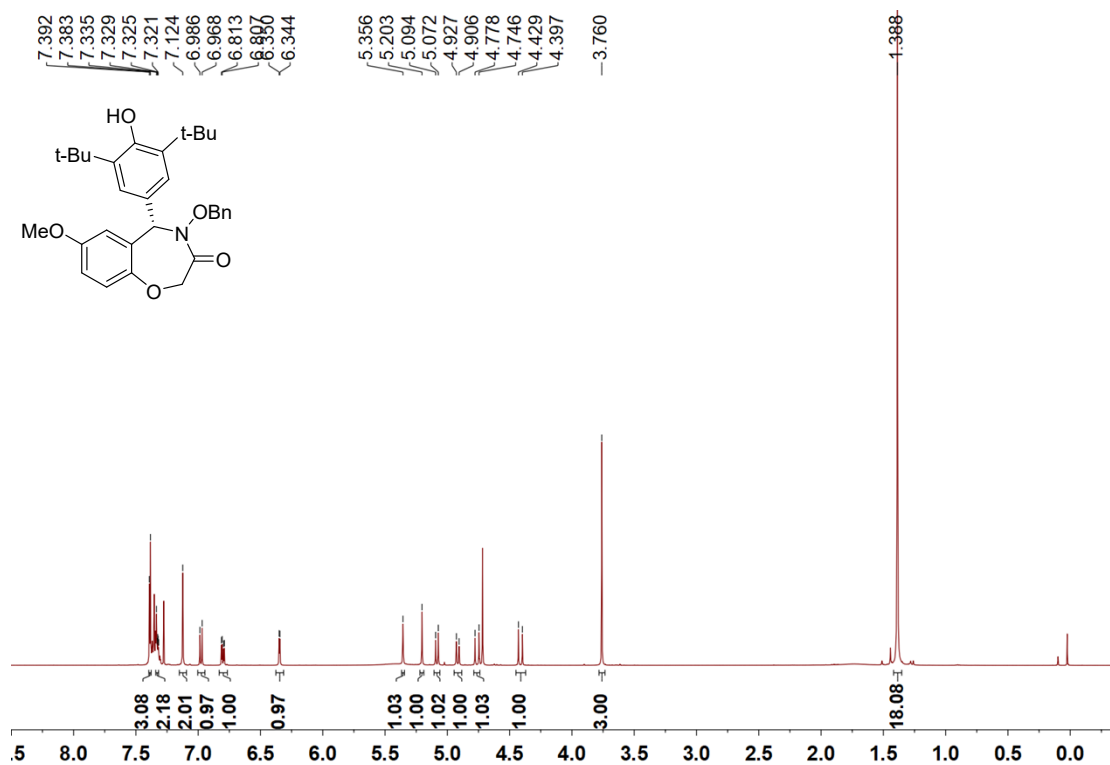

**<sup>13</sup>C NMR of compound 4f (125 MHz in CDCl<sub>3</sub>)**

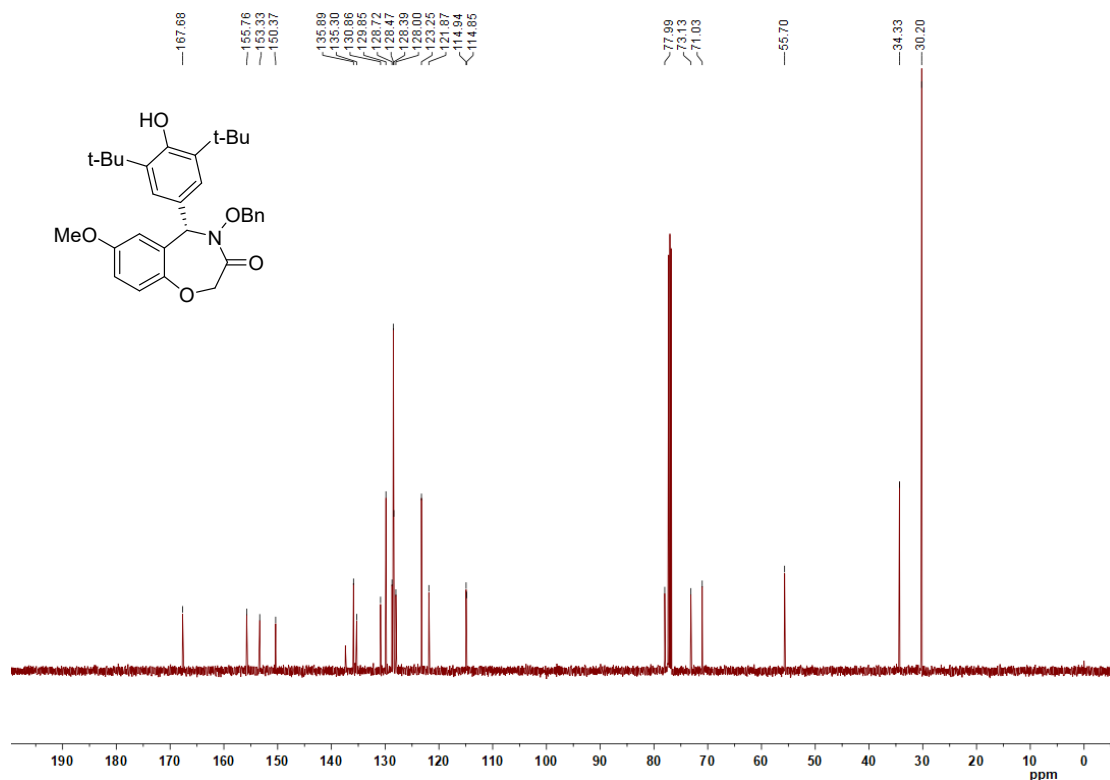

**<sup>1</sup>H NMR of compound 4g (500 MHz in CDCl<sub>3</sub>)**



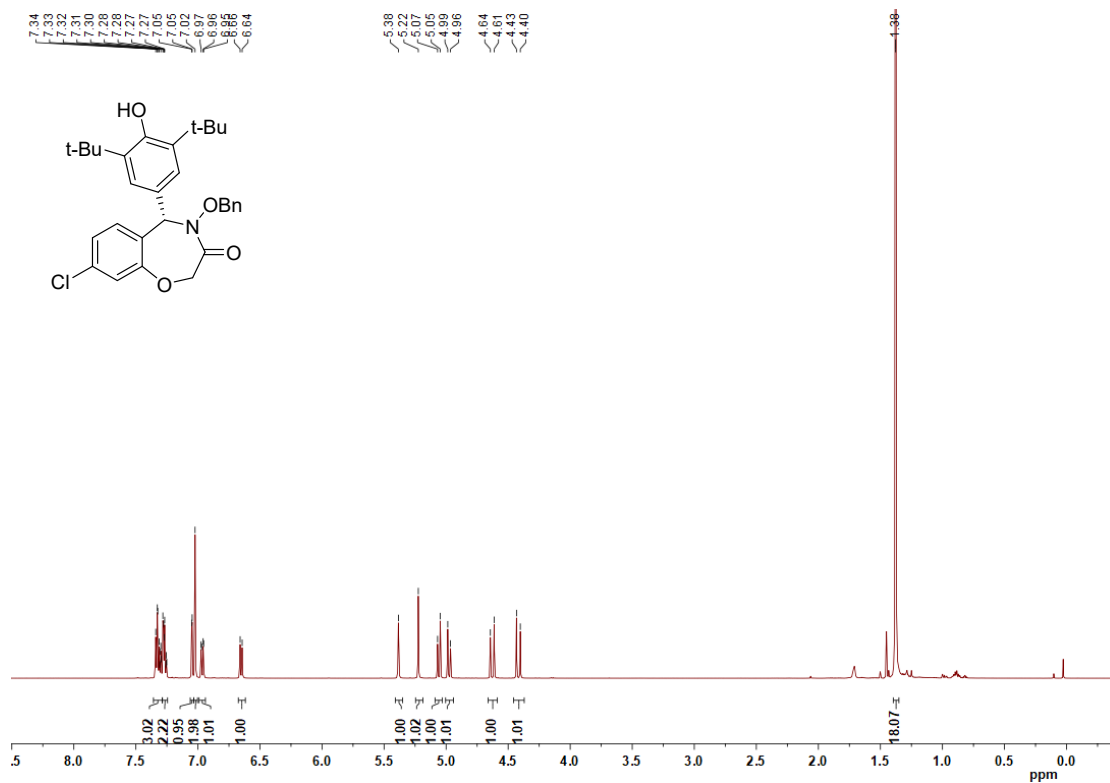

**<sup>13</sup>C NMR of compound 4g (125 MHz in CDCl<sub>3</sub>)**

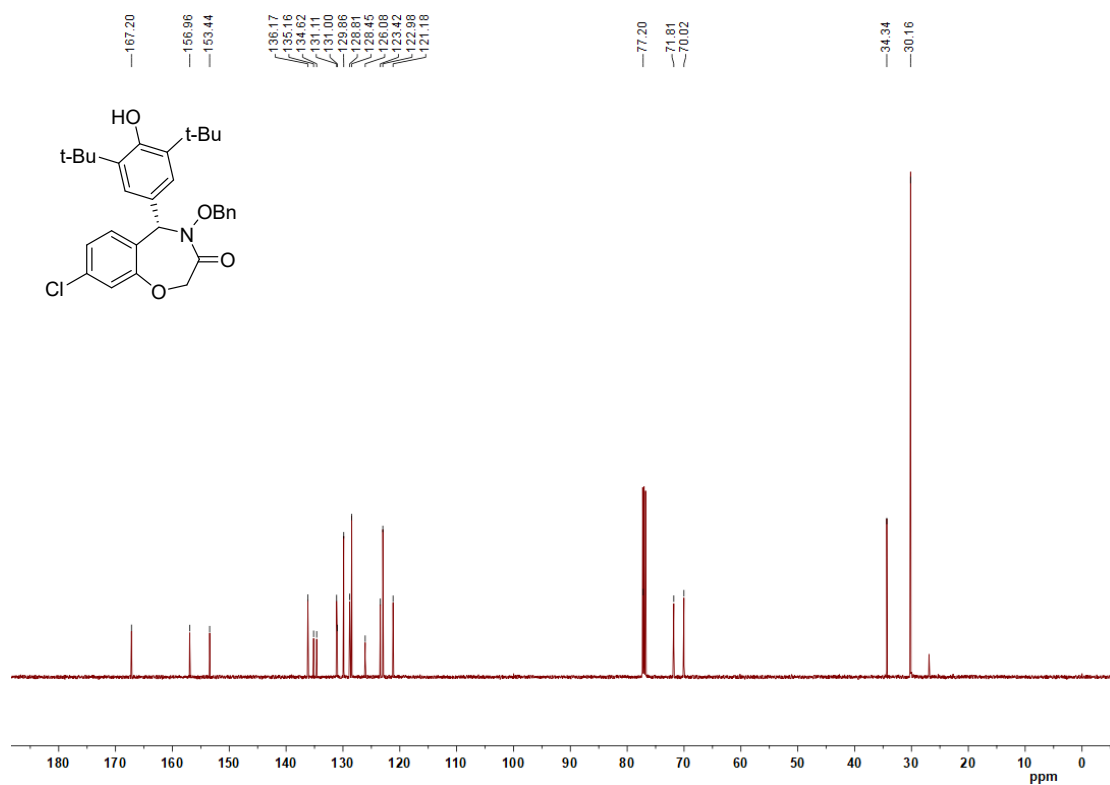

**<sup>1</sup>H NMR of compound 4h (500 MHz in CDCl<sub>3</sub>)**

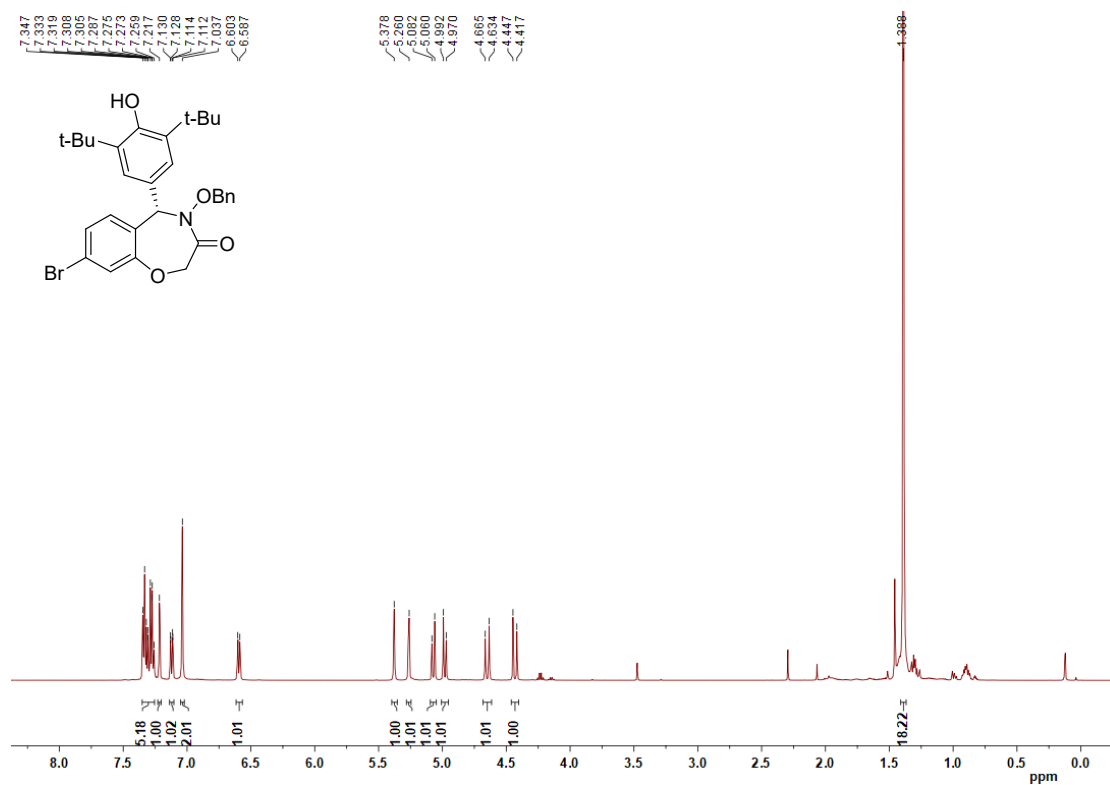

**<sup>13</sup>C NMR of compound 4h (125 MHz in CDCl<sub>3</sub>)**

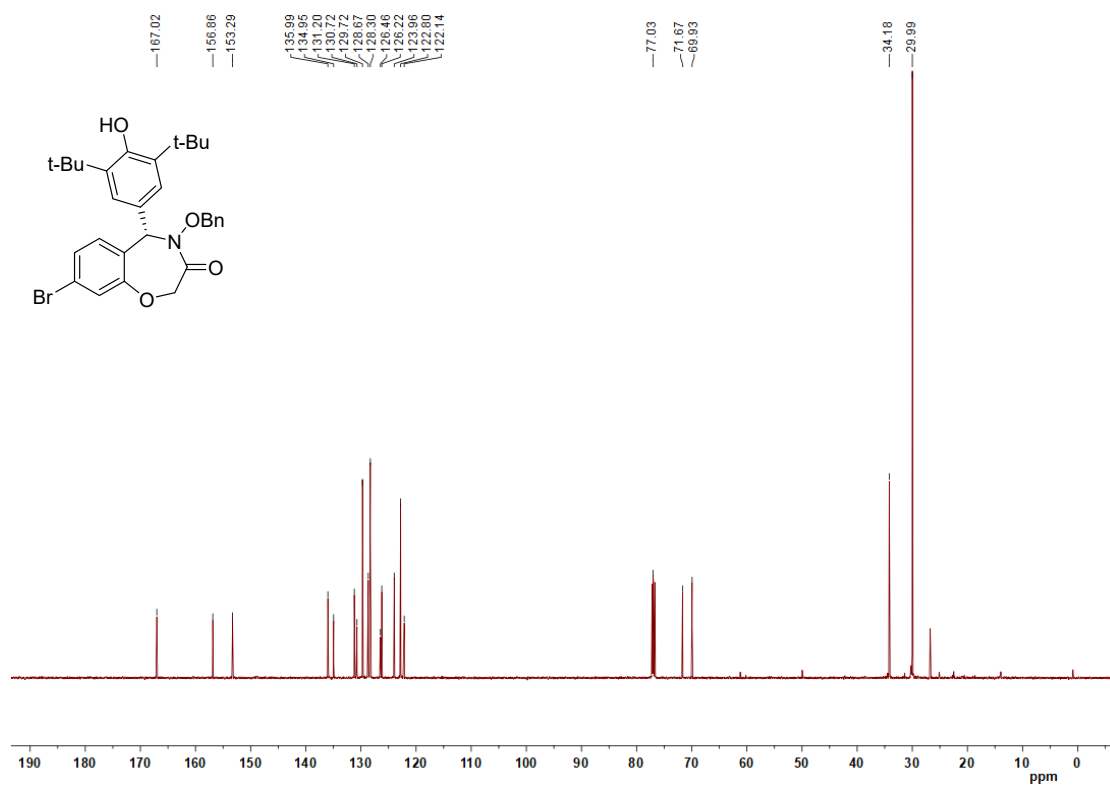

**<sup>1</sup>H NMR of compound 4i (600 MHz in CDCl<sub>3</sub>)**

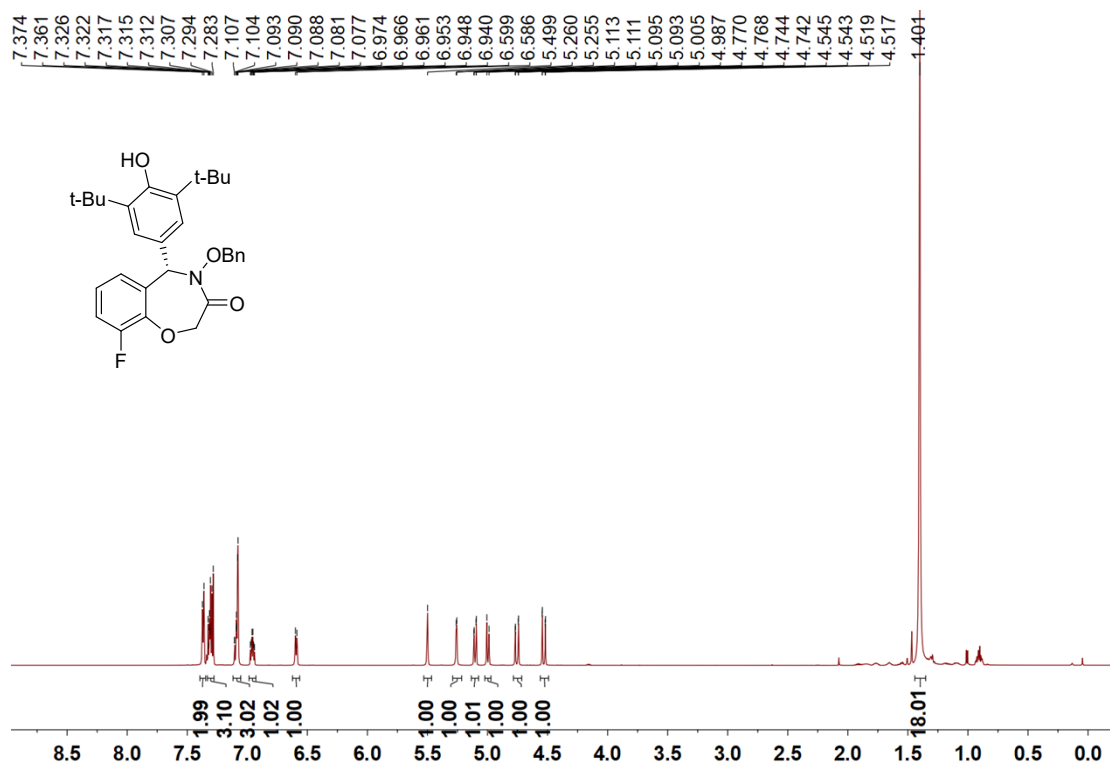

**<sup>13</sup>C NMR of compound 4i (150 MHz in CDCl<sub>3</sub>)**

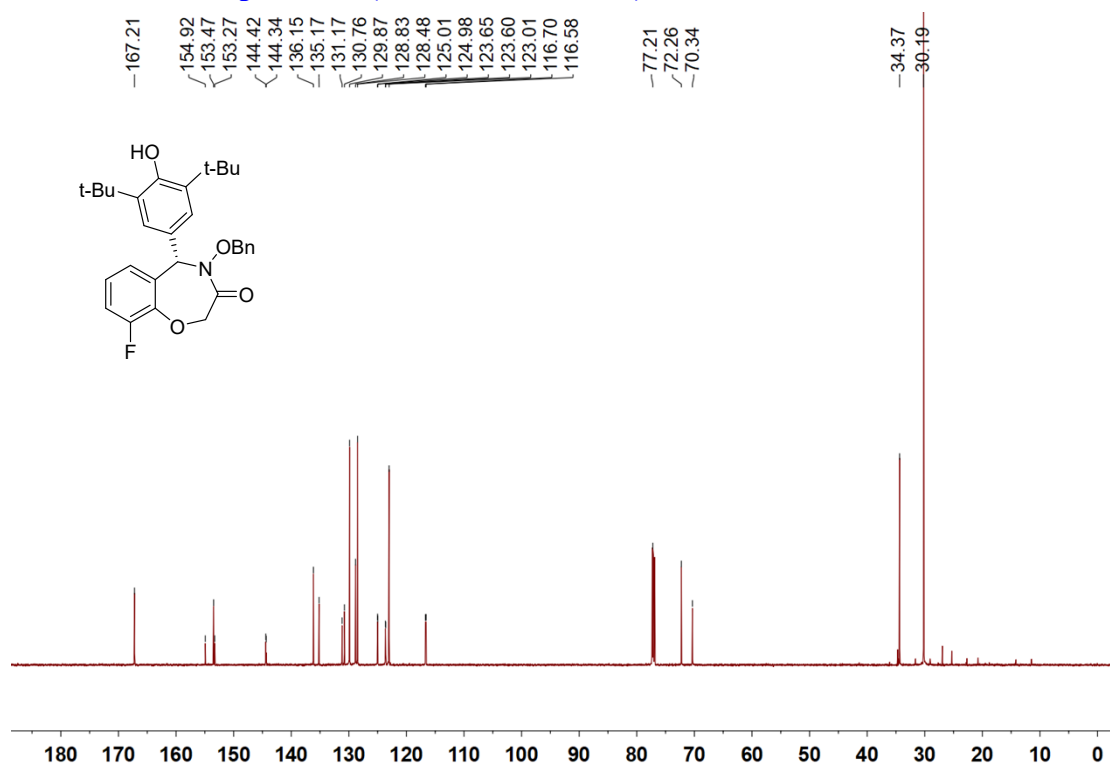

### $^1\text{H}$ NMR of compound 4j (500 MHz in $\text{CDCl}_3$ )

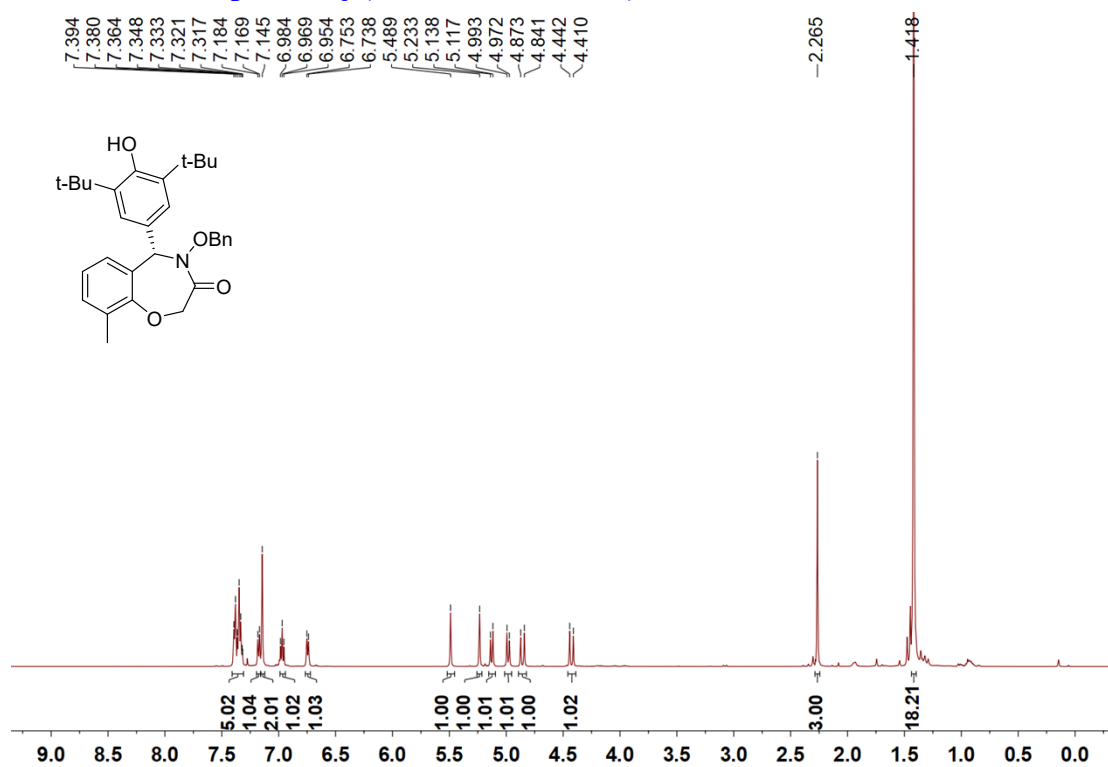

### $^{13}\text{C}$ NMR of compound 4j (125 MHz in $\text{CDCl}_3$ )

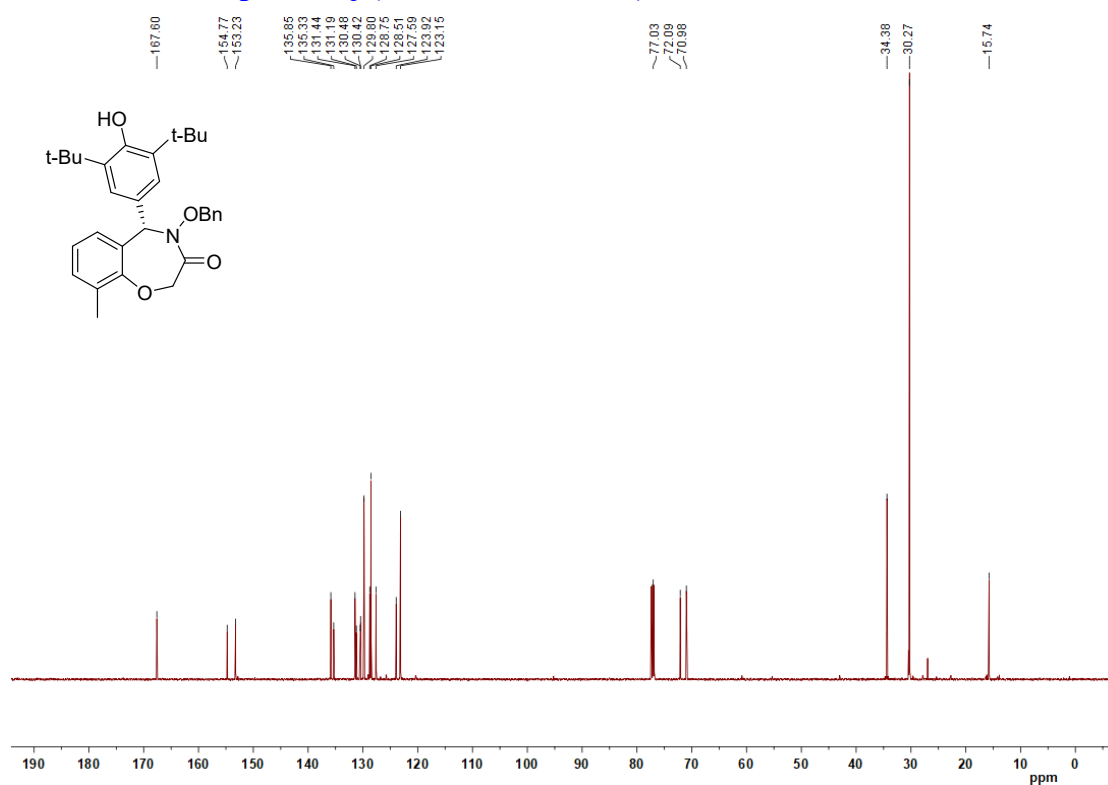

### <sup>1</sup>H NMR of compound 4k (500 MHz in CDCl<sub>3</sub>)

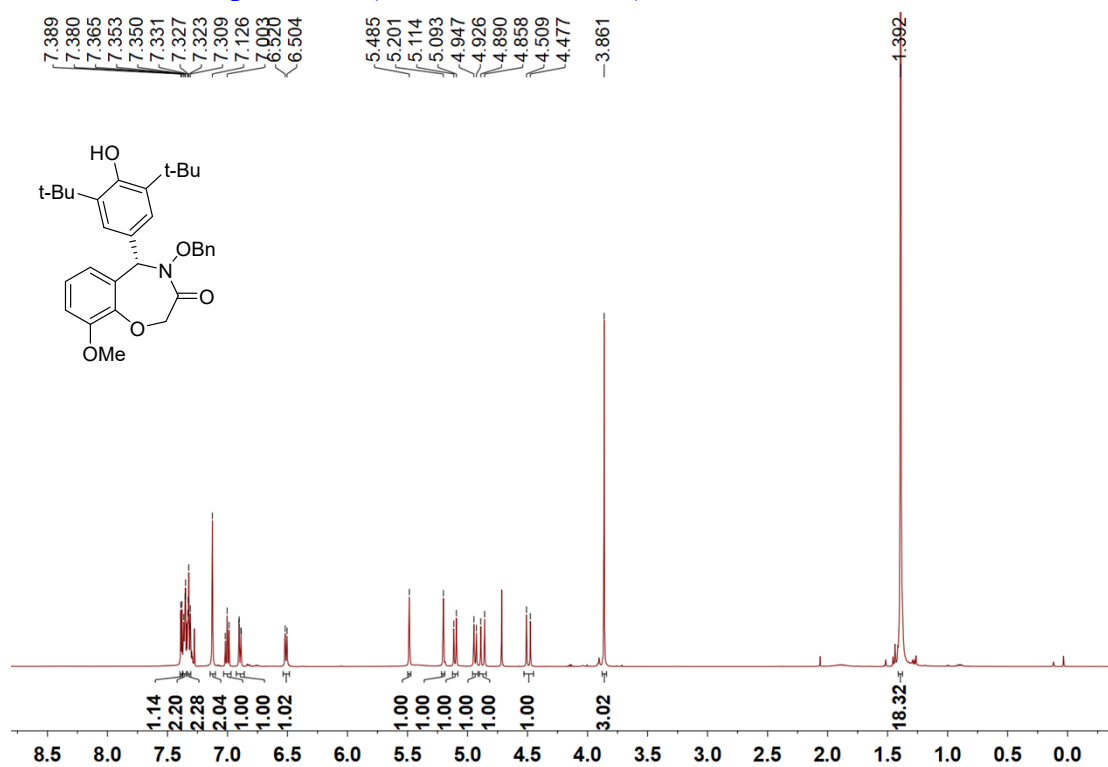

### <sup>13</sup>C NMR of compound 4k (125 MHz in CDCl<sub>3</sub>)

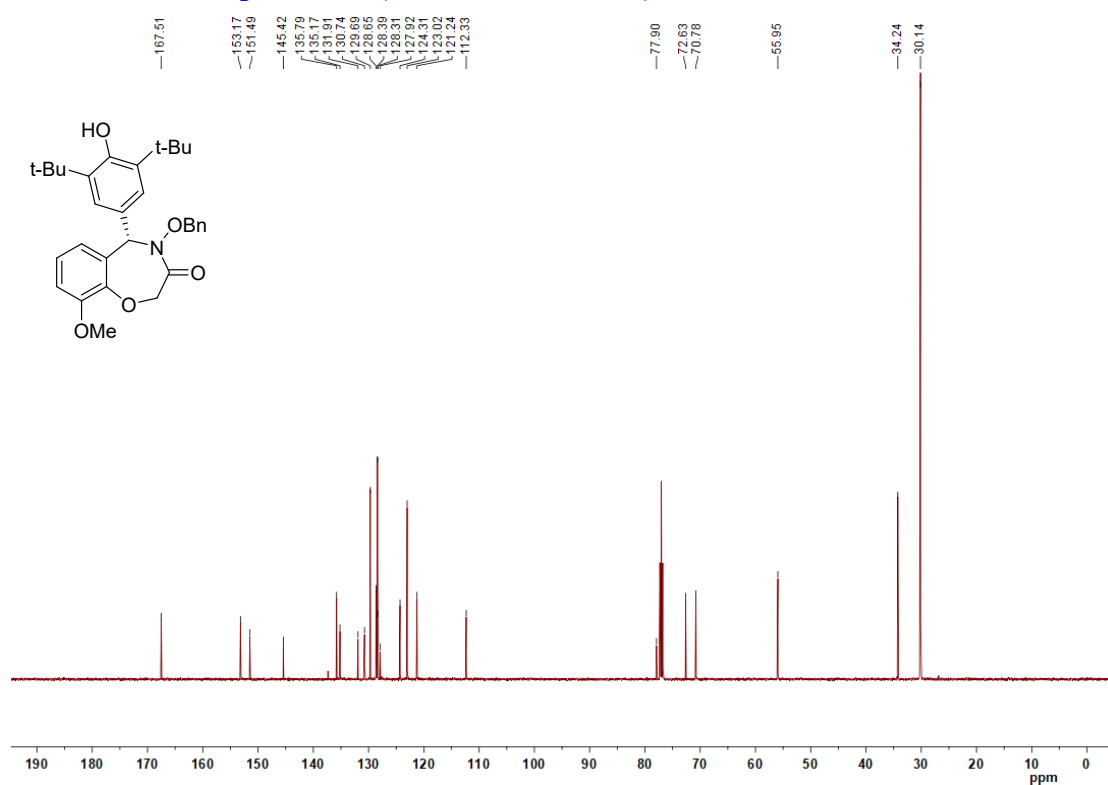

### <sup>1</sup>H NMR of compound 4l (500 MHz in CDCl<sub>3</sub>)

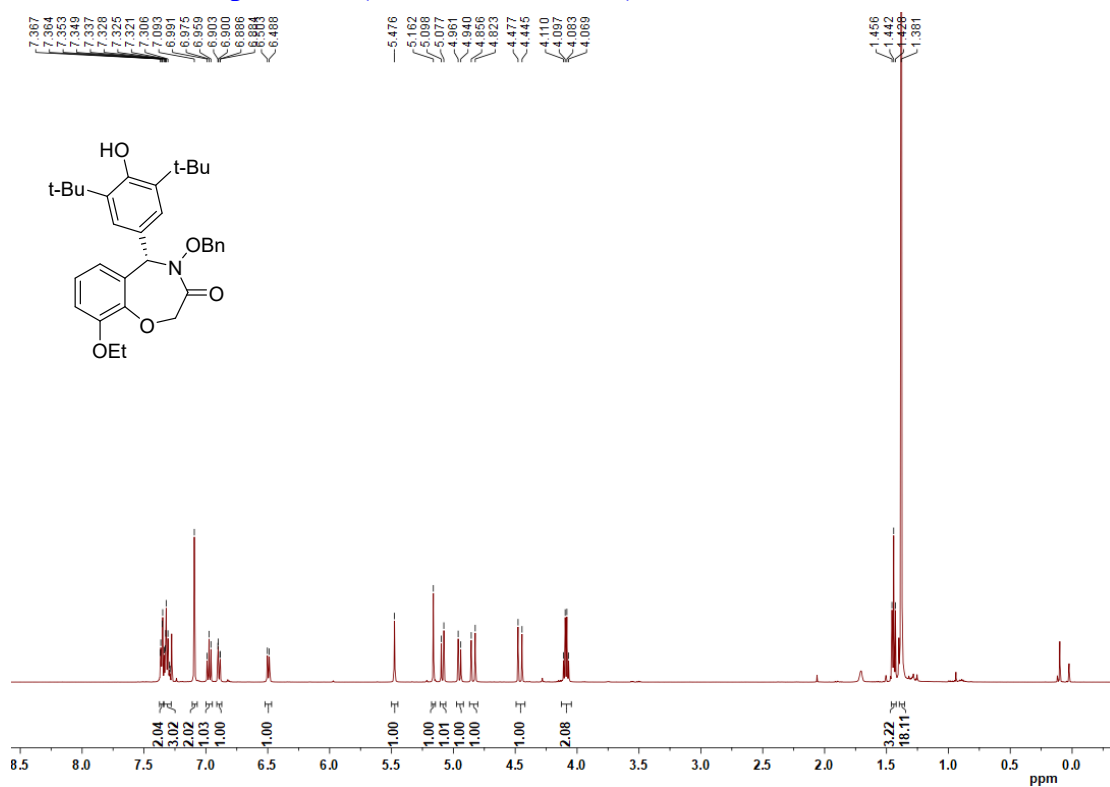

### <sup>13</sup>C NMR of compound 4l (125 MHz in CDCl<sub>3</sub>)

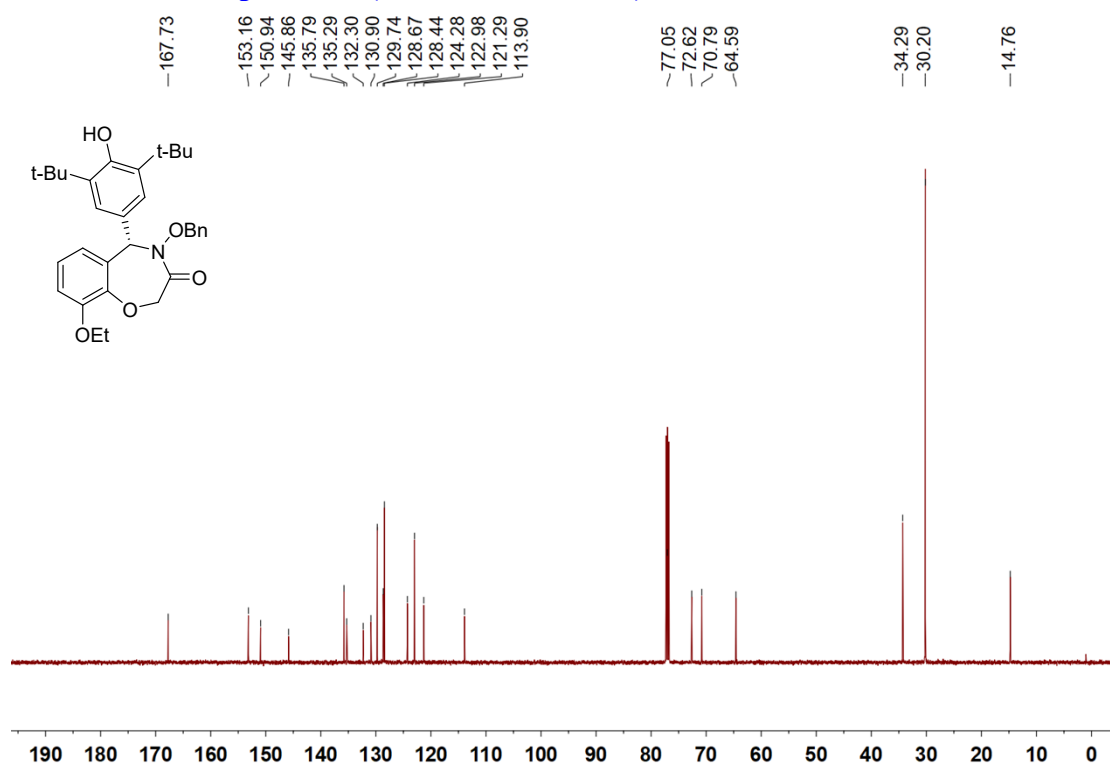

### $^1\text{H}$ NMR of compound 4m (500 MHz in $\text{CDCl}_3$ )

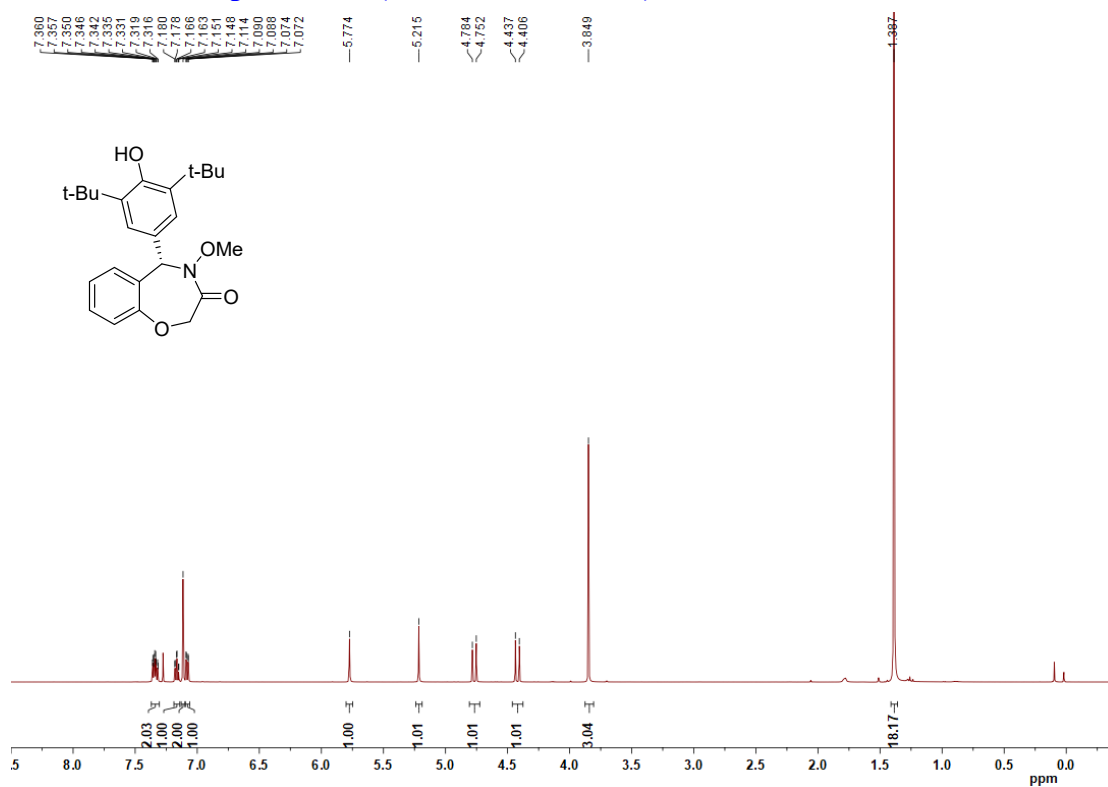

### $^{13}\text{C}$ NMR of compound 4m (125 MHz in $\text{CDCl}_3$ )

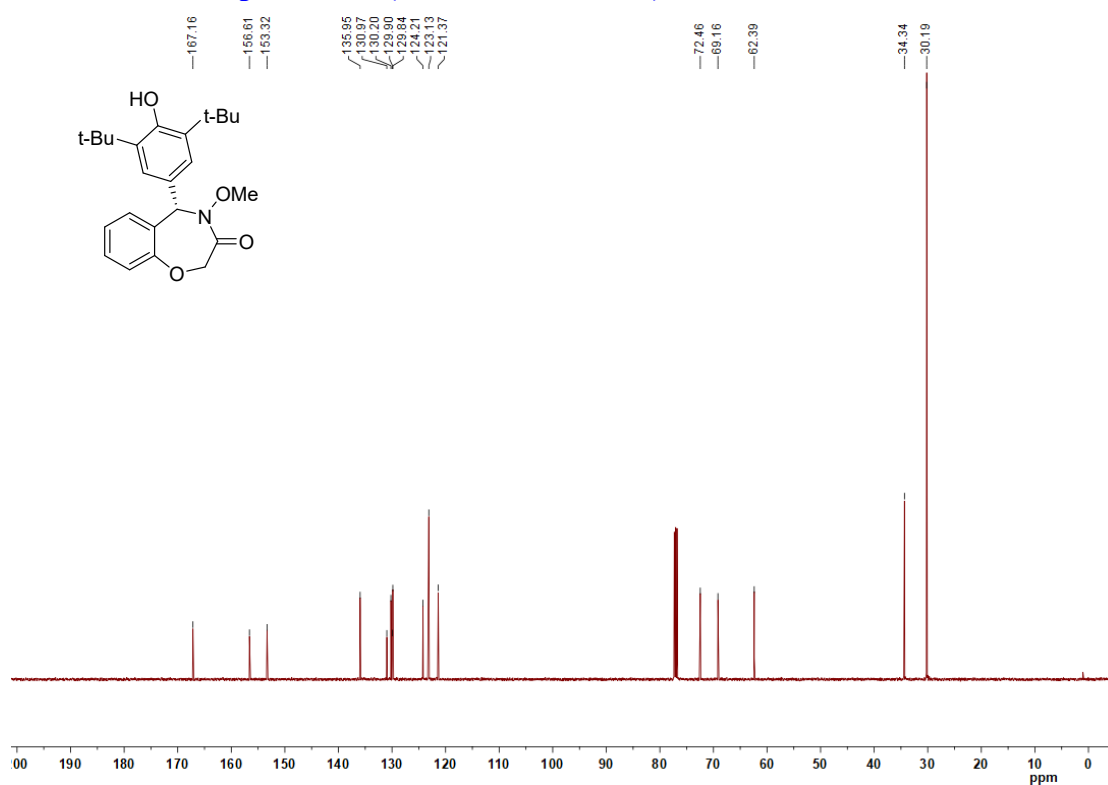

### <sup>1</sup>H NMR of compound 4n (500 MHz in CDCl<sub>3</sub>)

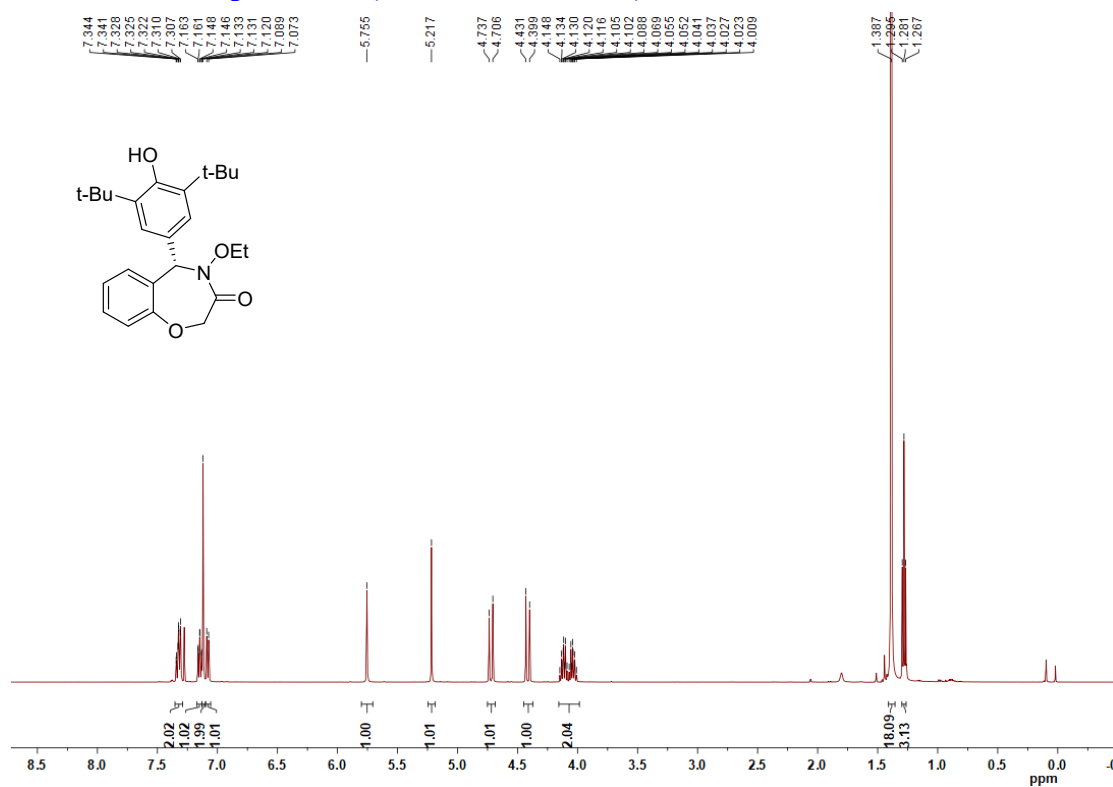

### <sup>13</sup>C NMR of compound 4n (125 MHz in CDCl<sub>3</sub>)

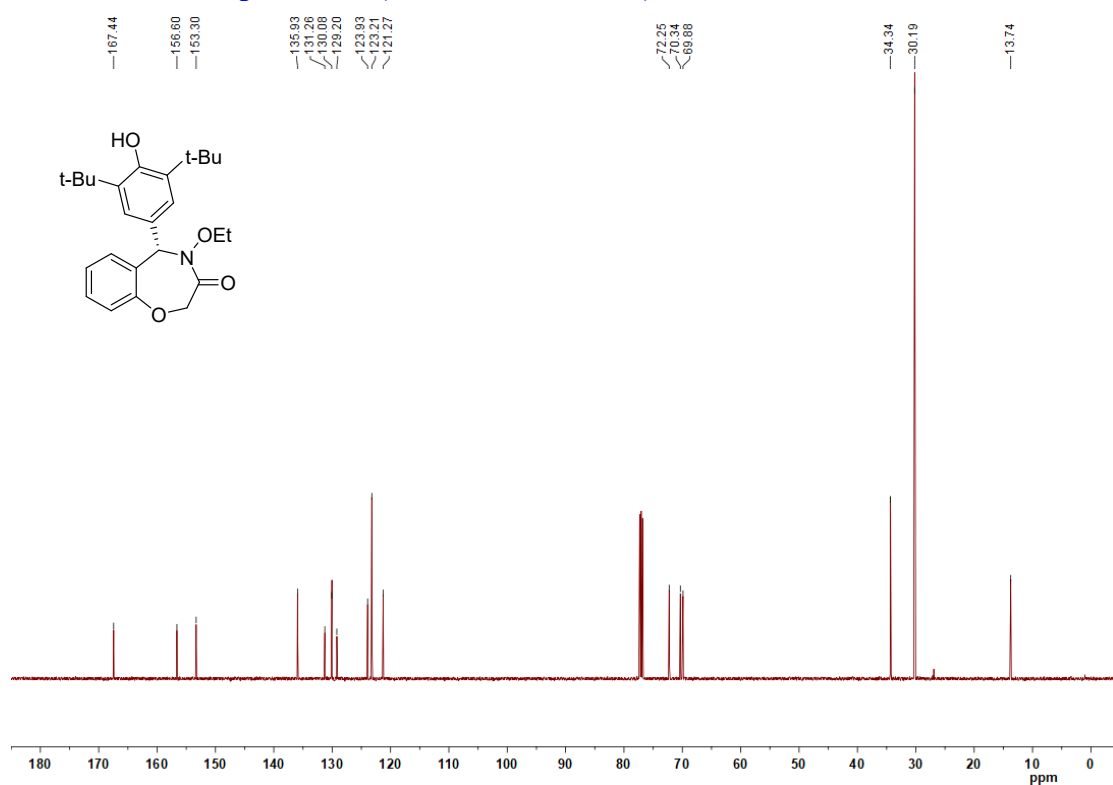



### <sup>1</sup>H NMR of compound 4o (600 MHz in CDCl<sub>3</sub>)

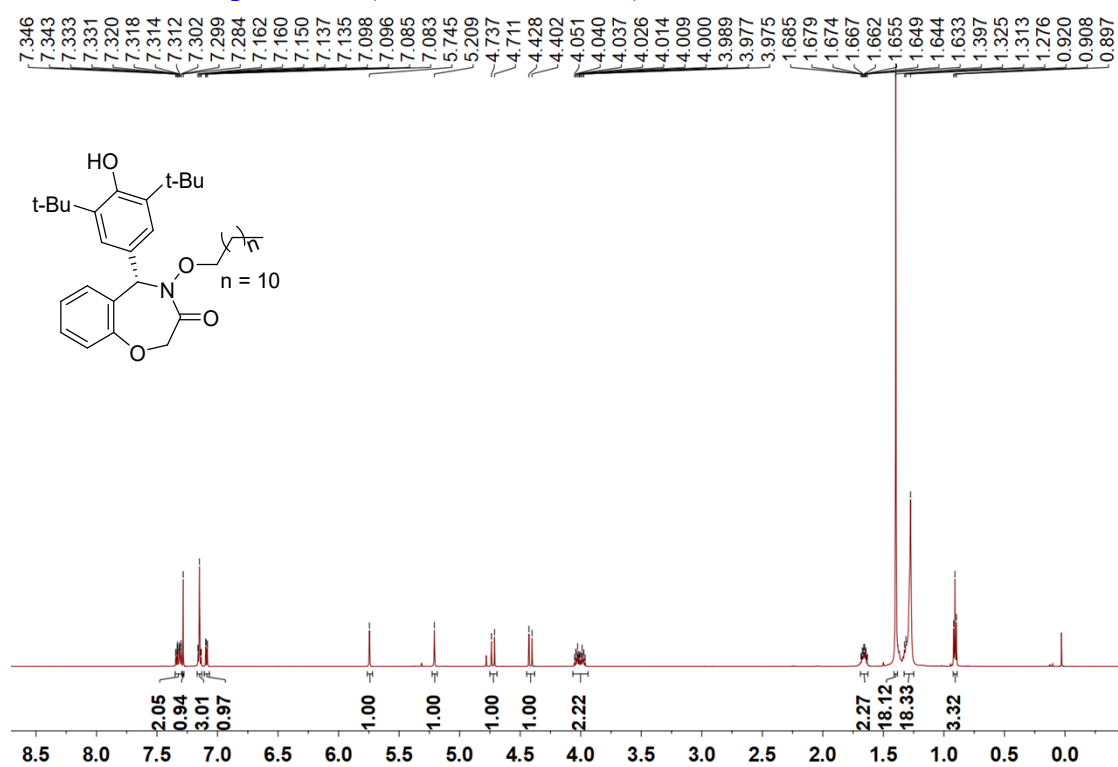

### <sup>13</sup>C NMR of compound 4o (150 MHz in CDCl<sub>3</sub>)

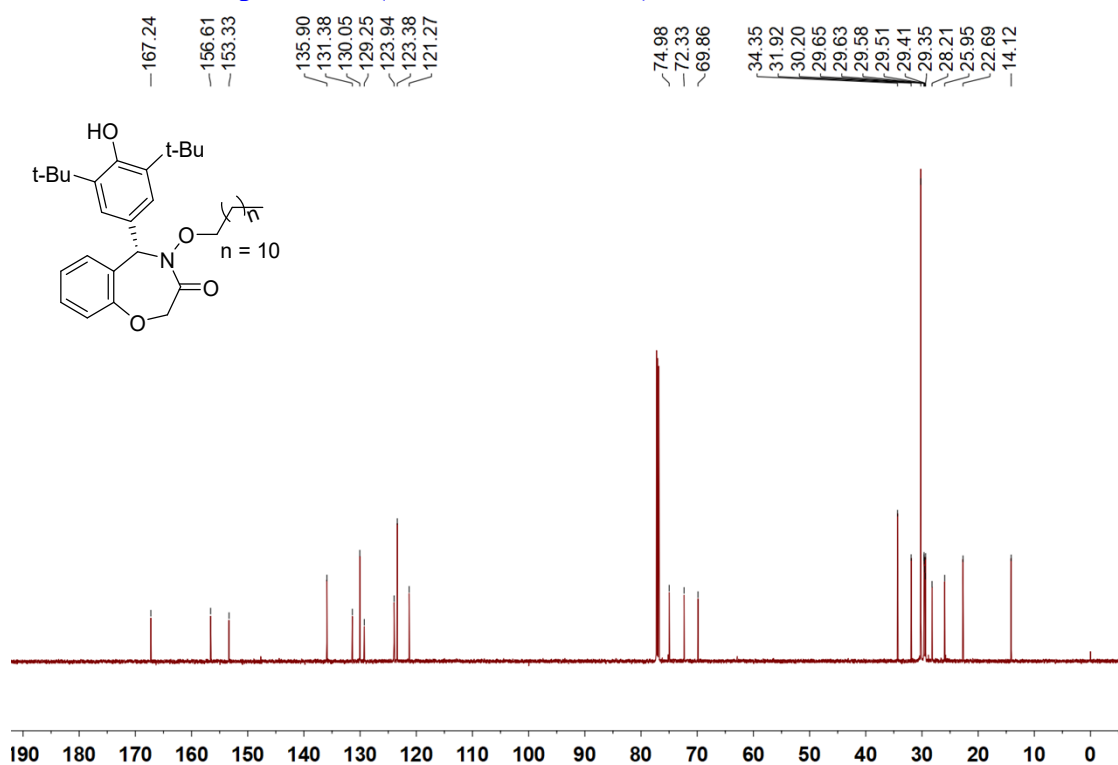

### $^1\text{H}$ NMR of compound 4p (600 MHz in $\text{CDCl}_3$ )

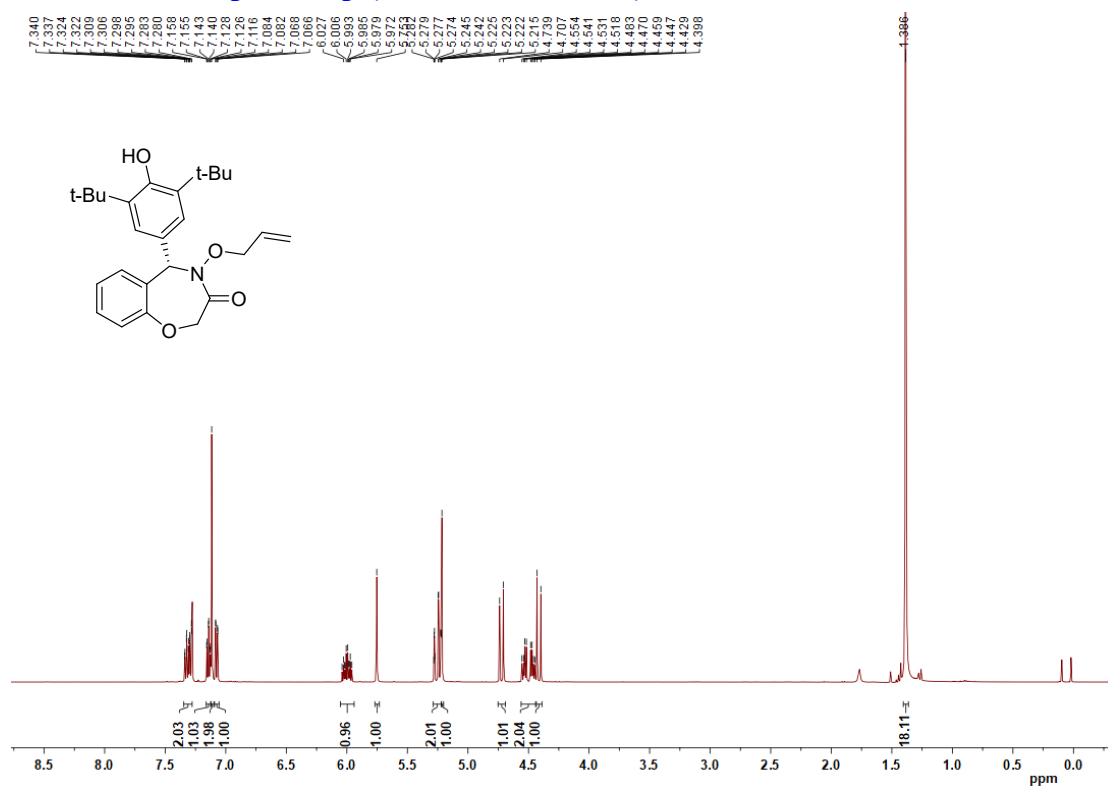

### $^{13}\text{C}$ NMR of compound 4p (150 MHz in $\text{CDCl}_3$ )

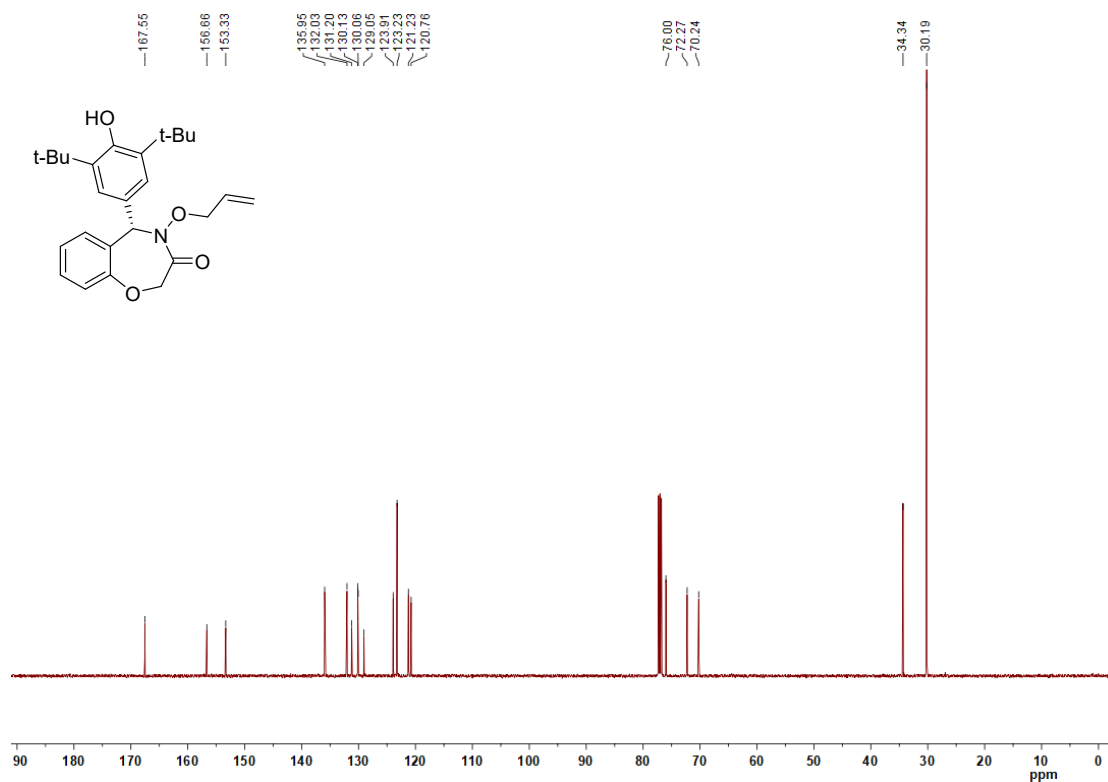

### <sup>1</sup>H NMR of compound 4q (400 MHz in CDCl<sub>3</sub>)

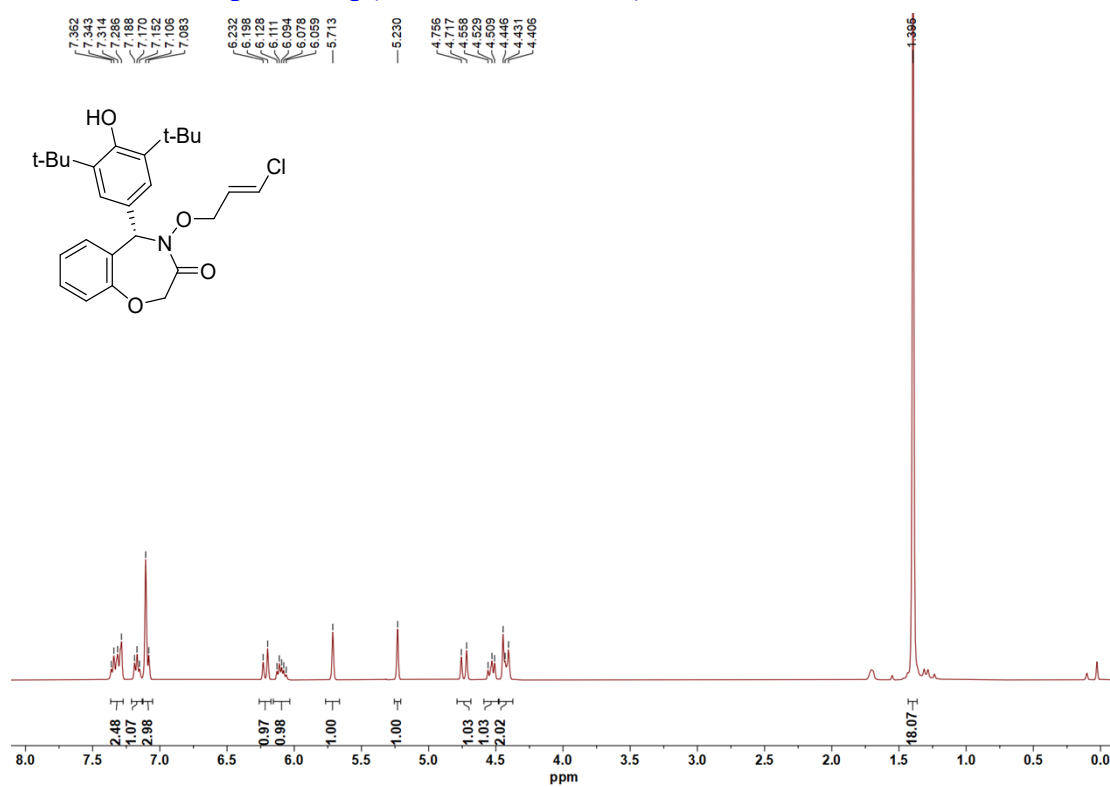

### <sup>13</sup>C NMR of compound 4q (100 MHz in CDCl<sub>3</sub>)

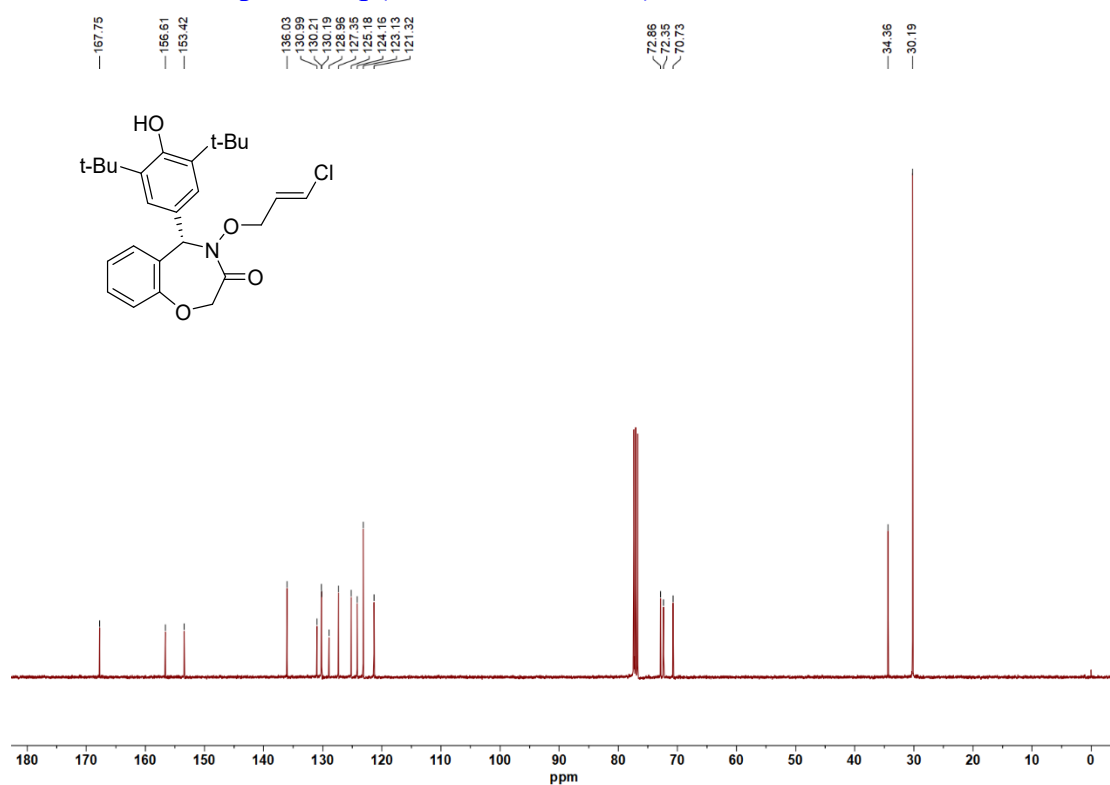

### $^1\text{H}$ NMR of compound 4r (500 MHz in $\text{CDCl}_3$ )

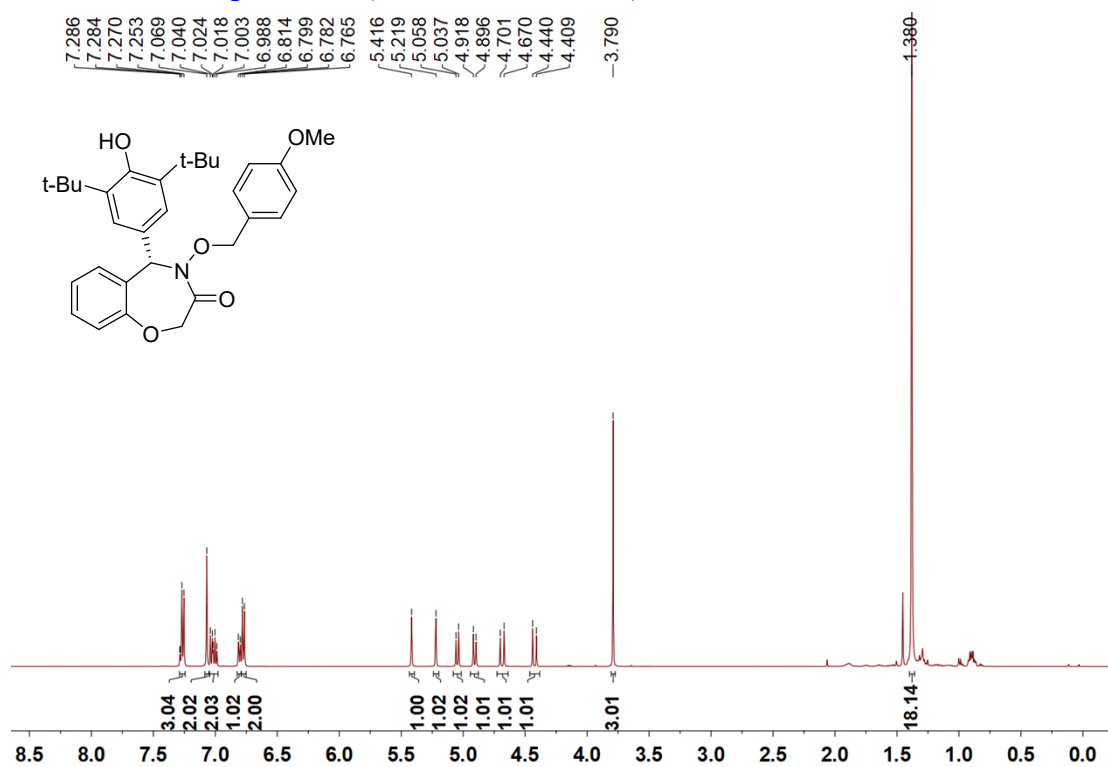

### $^{13}\text{C}$ NMR of compound 4r (125 MHz in $\text{CDCl}_3$ )

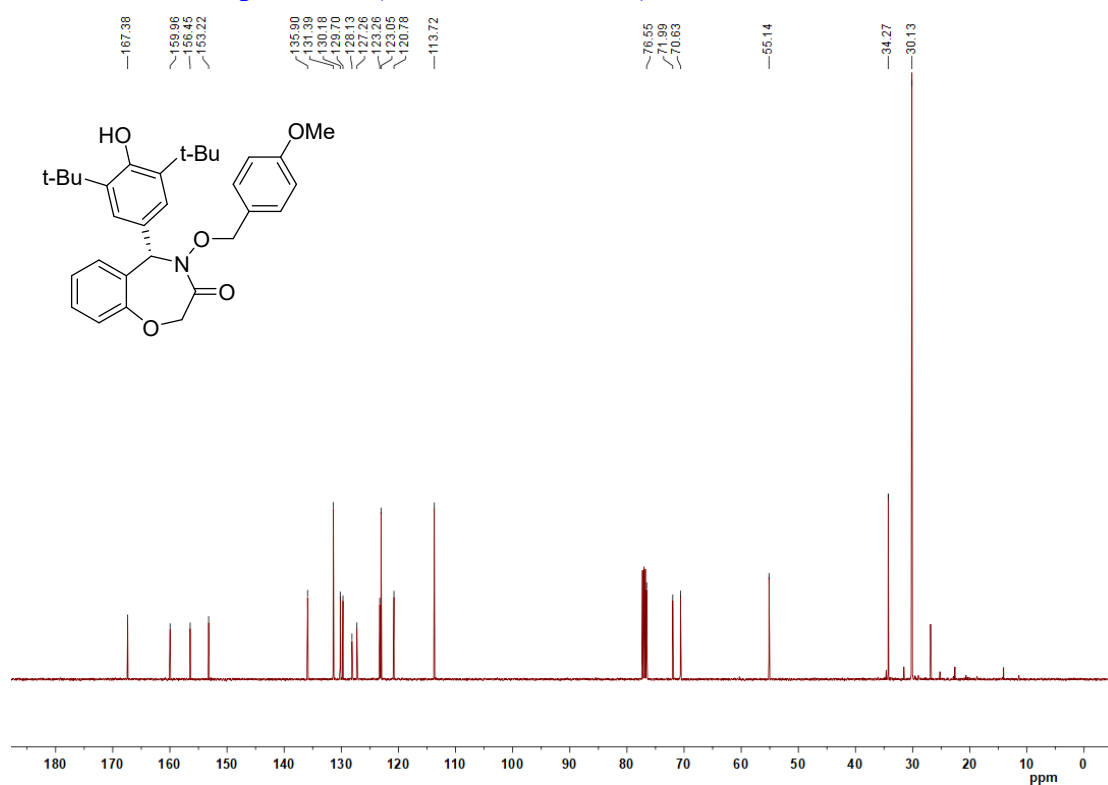

### <sup>1</sup>H NMR of compound 4s (400 MHz in CDCl<sub>3</sub>)

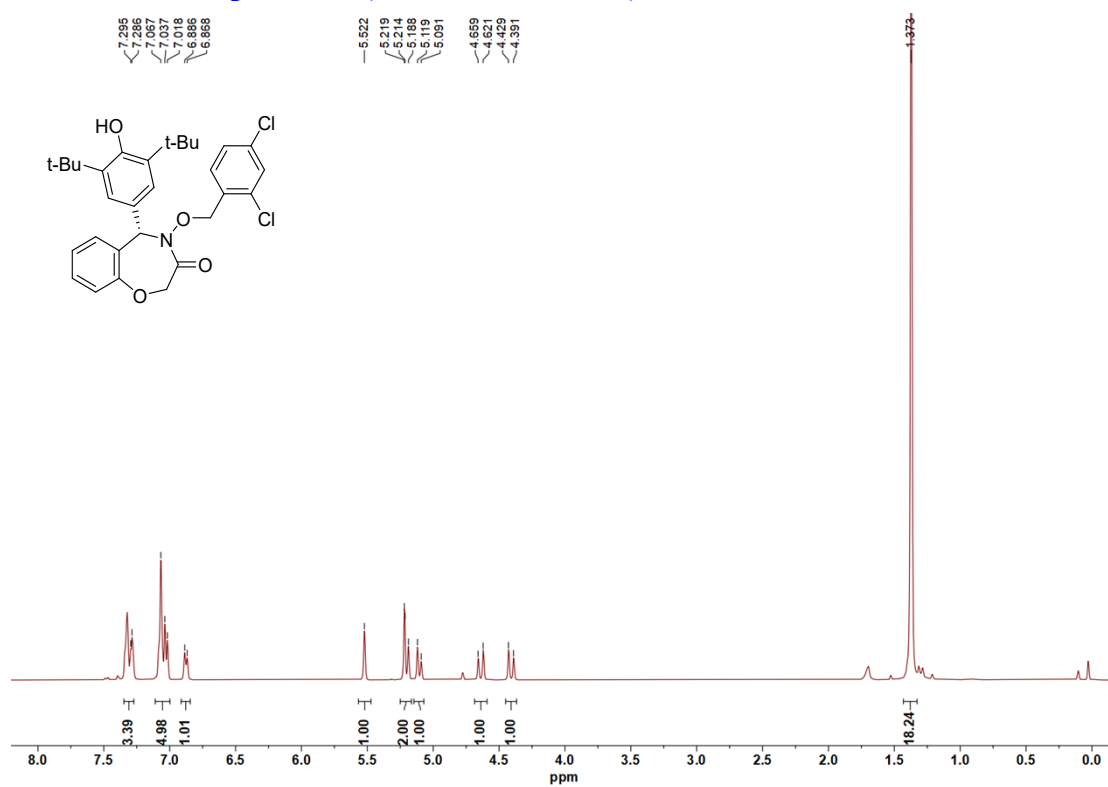

### <sup>13</sup>C NMR of compound 4s (100 MHz in CDCl<sub>3</sub>)

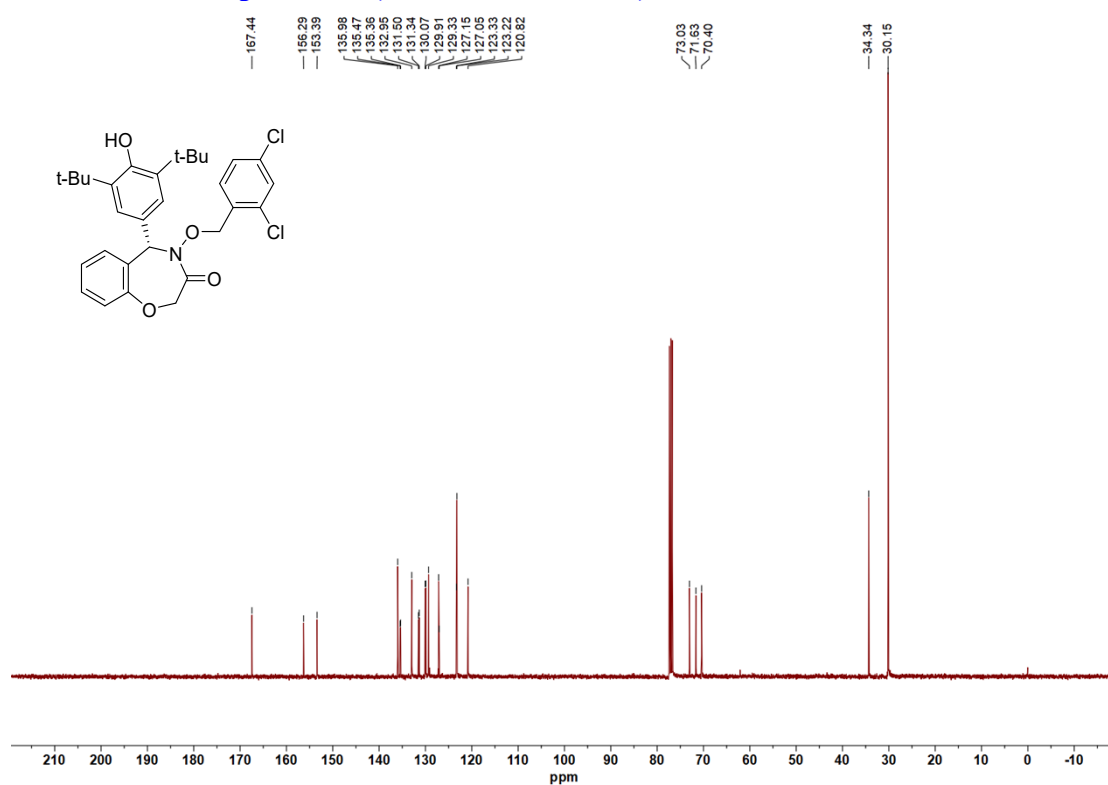

### <sup>1</sup>H NMR of compound 4t (400 MHz in CDCl<sub>3</sub>)

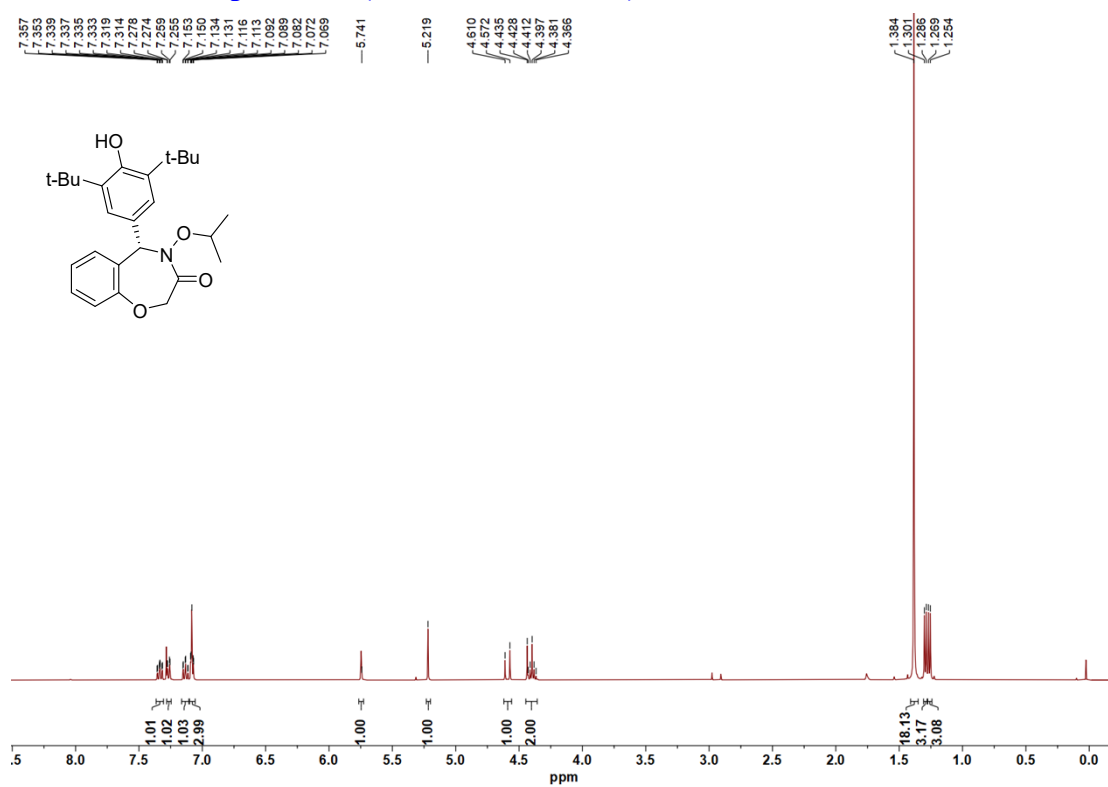

### <sup>13</sup>C NMR of compound 4t (100 MHz in CDCl<sub>3</sub>)

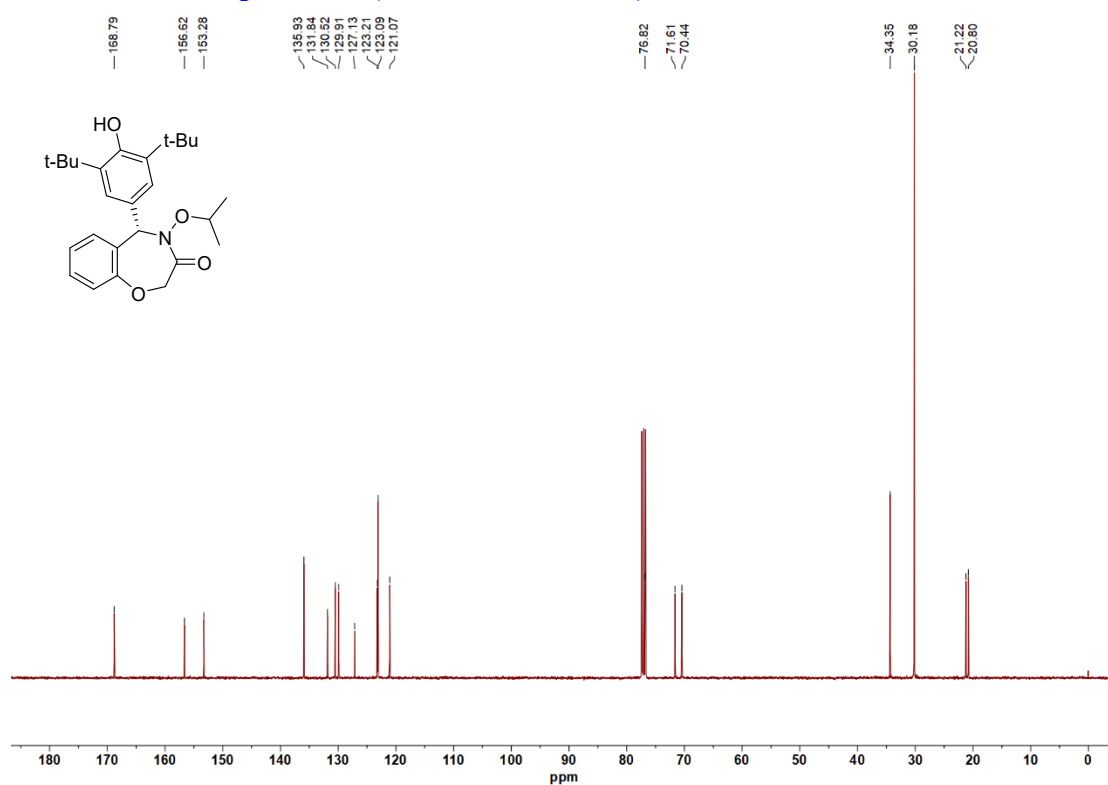

### $^1\text{H}$ NMR of compound 3u (400 MHz in $\text{CDCl}_3$ )

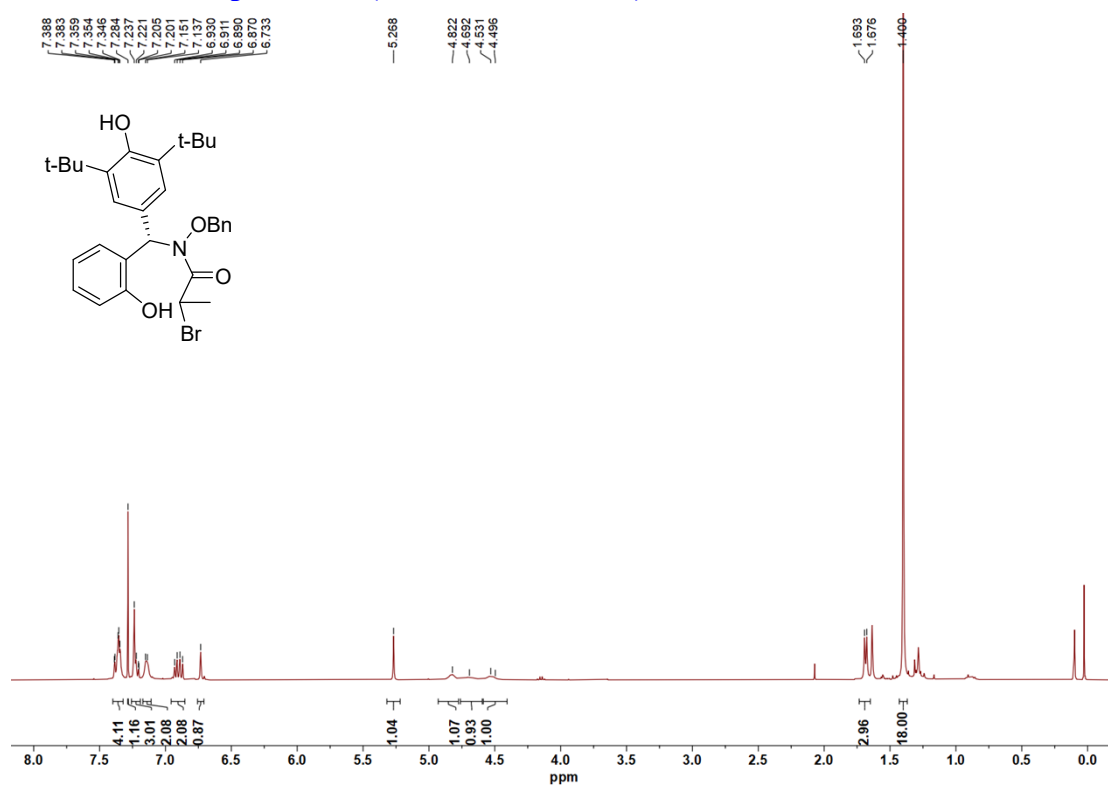

### $^{13}\text{C}$ NMR of compound 3u (100 MHz in $\text{CDCl}_3$ )

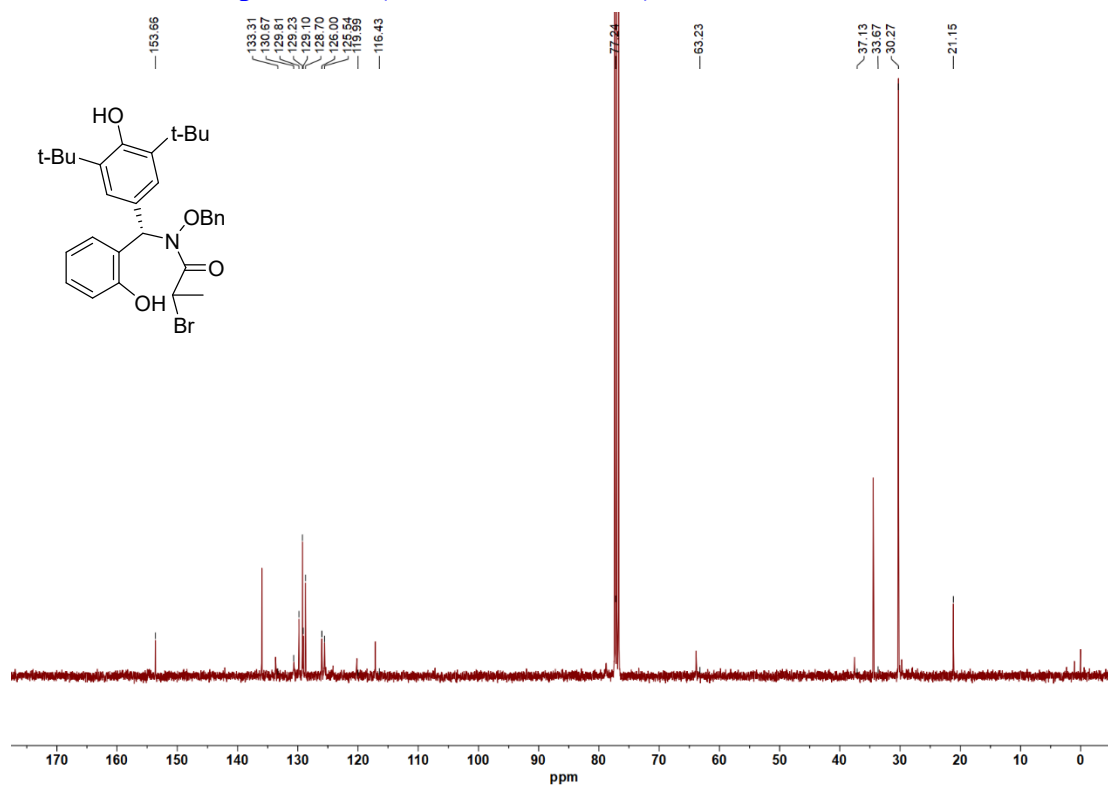

### $^1\text{H}$ NMR of compound 5 (600 MHz in $\text{CDCl}_3$ )

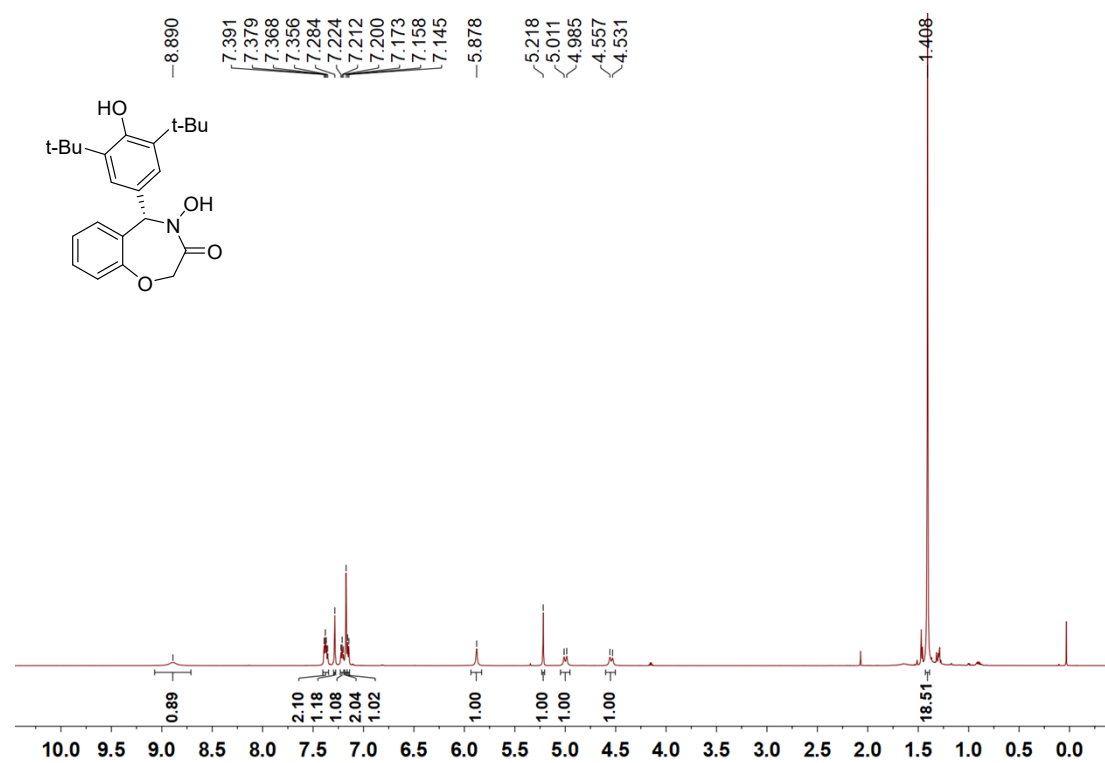

### $^{13}\text{C}$ NMR of compound 5 (150 MHz in $\text{CDCl}_3$ )

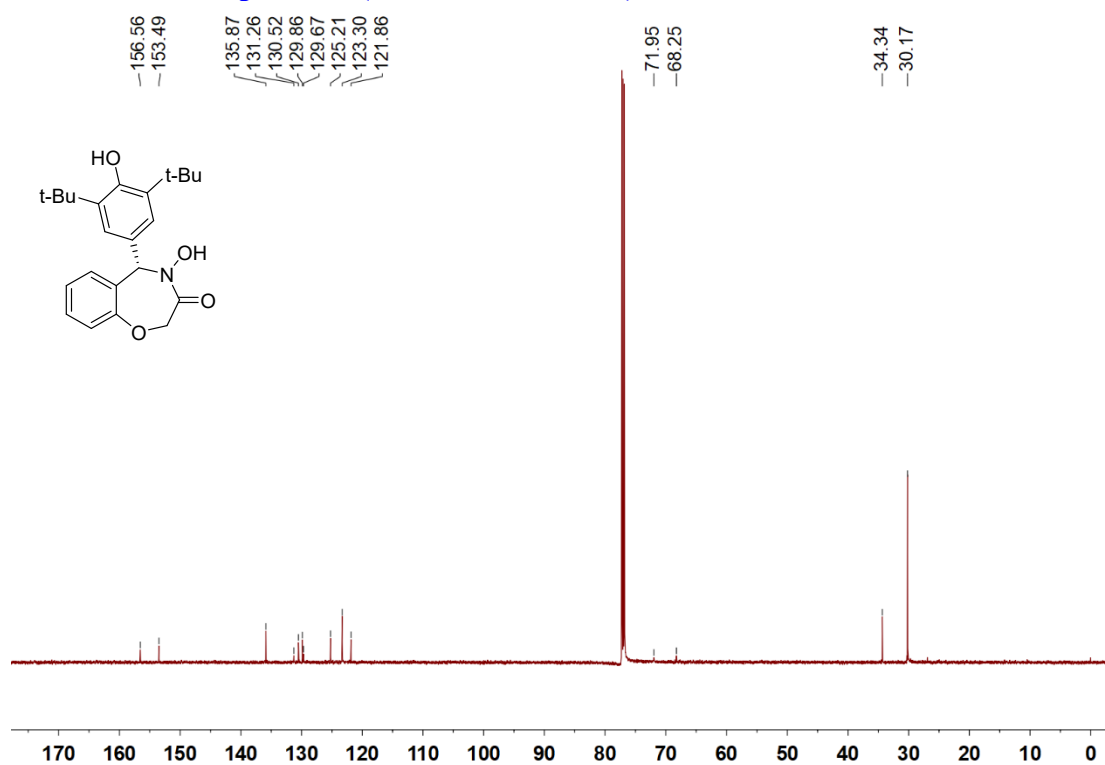



### <sup>1</sup>H NMR of compound 6 (600 MHz in CDCl<sub>3</sub>)

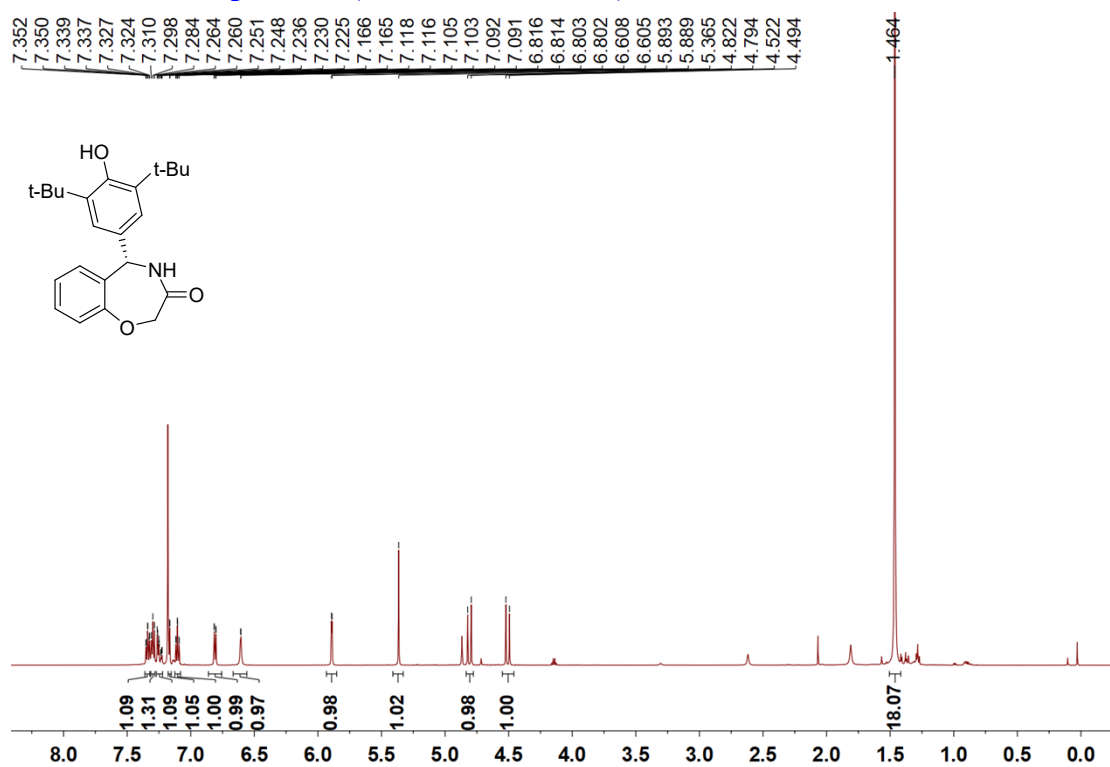

### <sup>13</sup>C NMR of compound 6 (150 MHz in CDCl<sub>3</sub>)

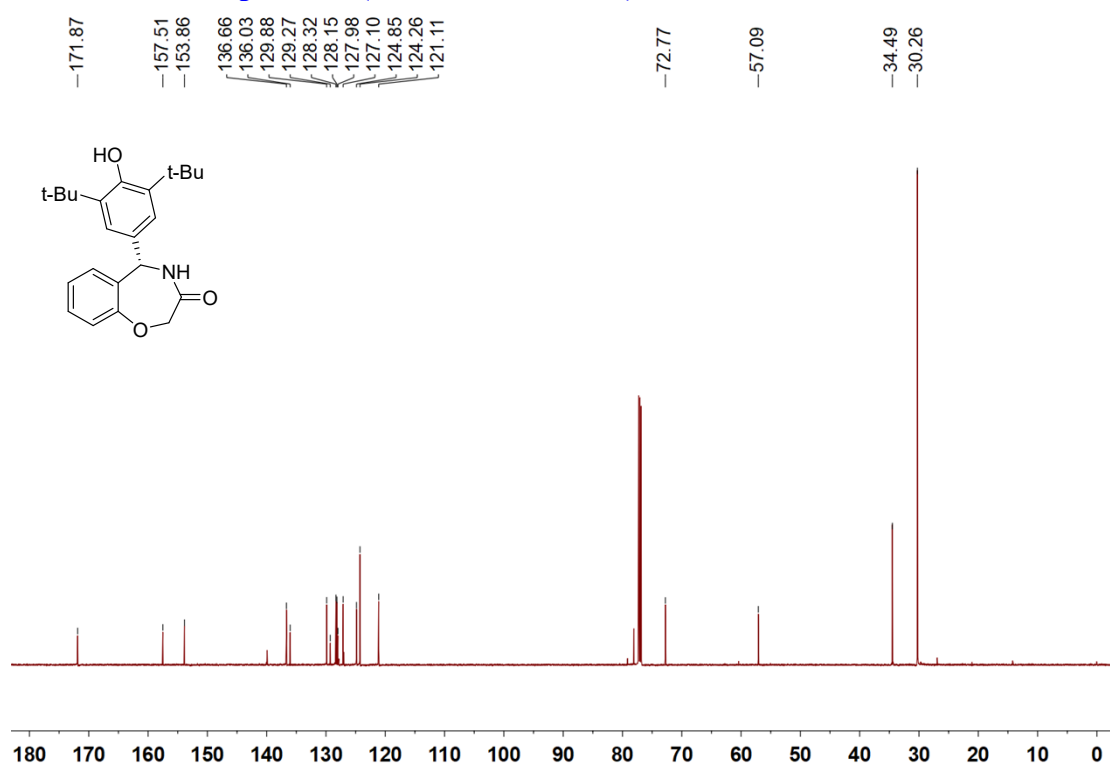

### <sup>1</sup>H NMR of compound 8a (400 MHz in CDCl<sub>3</sub>)

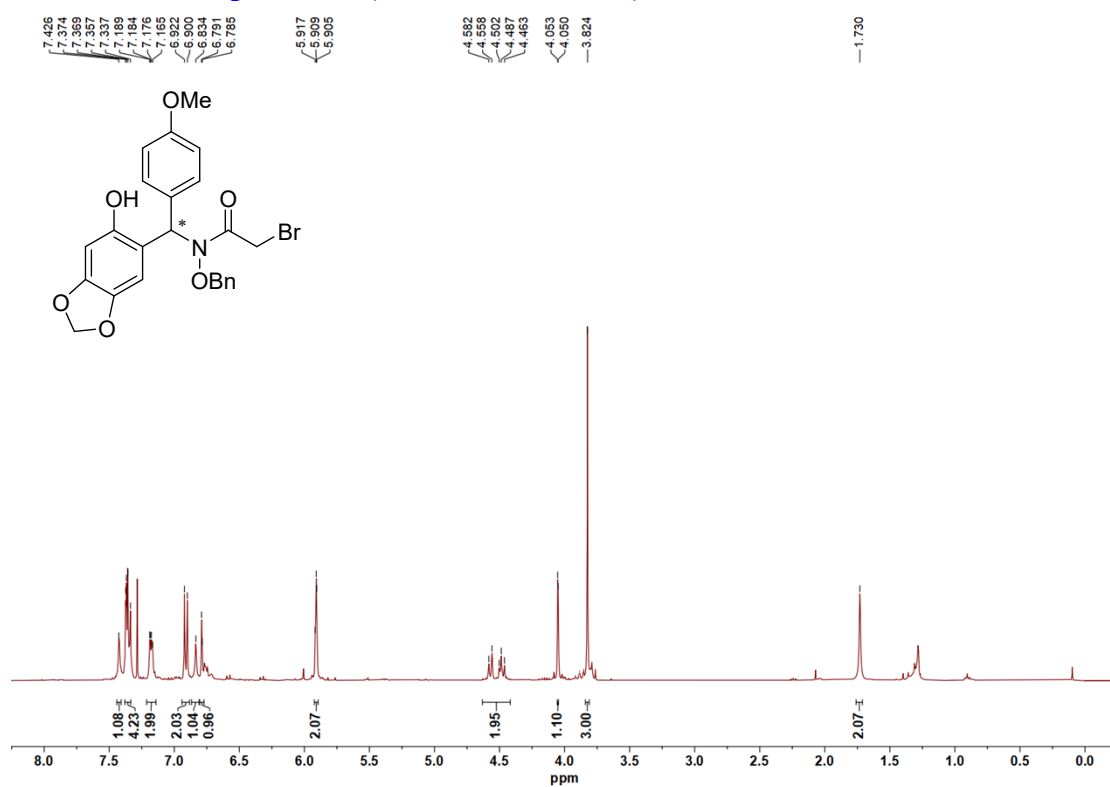

### <sup>13</sup>C NMR of compound 8a (100 MHz in CDCl<sub>3</sub>)

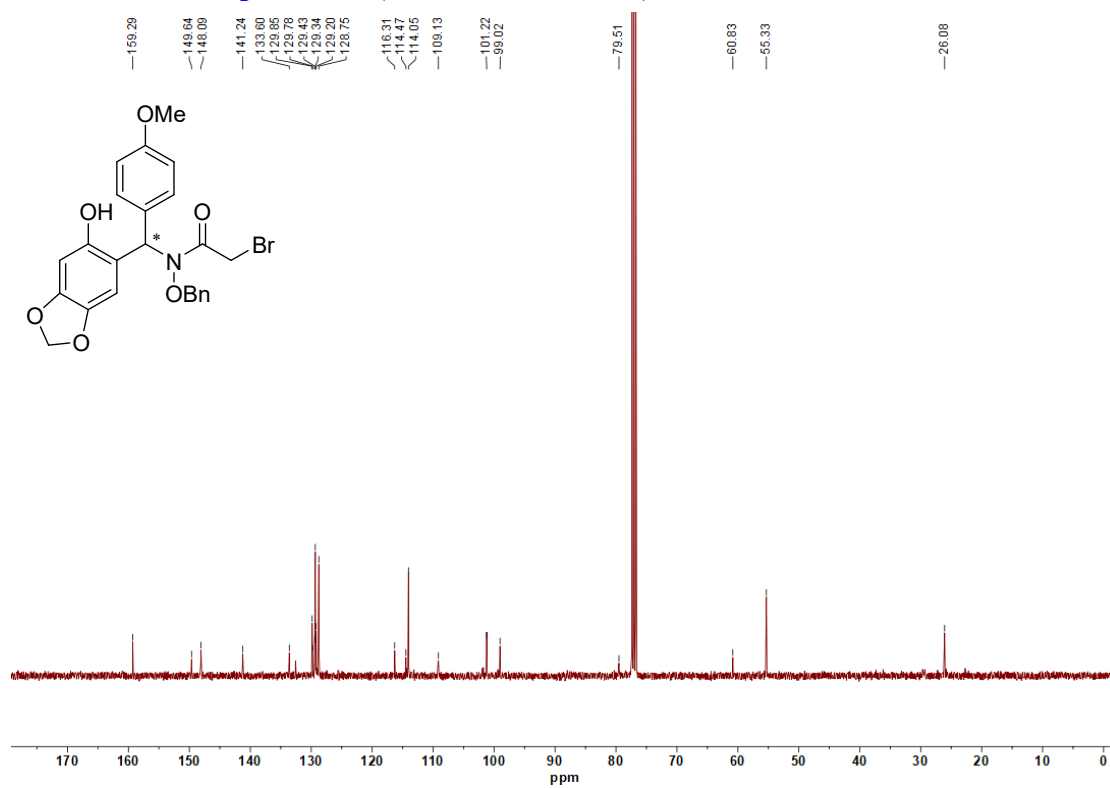

## 9. Crystal data and structure refinement for enantiopure 4i.

Crystals of enantiopure **4i** suitable for X-ray analysis were obtained from crystallization in a solution of CH<sub>2</sub>Cl<sub>2</sub> and n-hexan

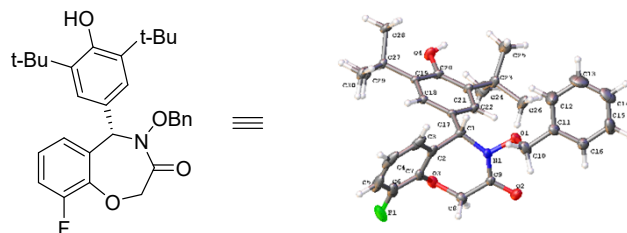

|                                   |                                                    |          |
|-----------------------------------|----------------------------------------------------|----------|
| CCDC deposition number            | 2226867                                            |          |
| Empirical formula                 | C <sub>30</sub> H <sub>34</sub> F N O <sub>4</sub> |          |
| Formula weight                    | 491.60                                             |          |
| Temperature                       | 213.00 K                                           |          |
| Wavelength                        | 1.34139 Å                                          |          |
| Crystal system                    | Orthorhombic                                       |          |
| Space group                       | P2 <sub>1</sub> 2 <sub>1</sub> 2 <sub>1</sub>      |          |
| Unit cell dimensions              | a = 10.13420(10) Å                                 | α = 90°. |
|                                   | b = 10.9767(2) Å                                   | β = 90°. |
|                                   | c = 27.3919(4) Å                                   | γ = 90°. |
| Volume                            | 3047.08(8) Å <sup>3</sup>                          |          |
| Z                                 | 4                                                  |          |
| Density (calculated)              | 1.257 Mg/m <sup>3</sup>                            |          |
| Absorption coefficient            | 1.486 mm <sup>-1</sup>                             |          |
| F(000)                            | 1216                                               |          |
| Crystal size                      | 0.1 x 0.07 x 0.07 mm <sup>3</sup>                  |          |
| Theta range for data collection   | 3.774 to 54.997°.                                  |          |
| Index ranges                      | -12 ≤ h ≤ 9, -13 ≤ k ≤ 13, -33 ≤ l ≤ 33            |          |
| Reflections collected             | 32680                                              |          |
| Independent reflections           | 5782 [R(int) = 0.0460]                             |          |
| Completeness to theta = 25.242°   | 99.3 %                                             |          |
| Absorption correction             | Semi-empirical from equivalents                    |          |
| Max. and min. transmission        | 0.7508 and 0.5934                                  |          |
| Refinement method                 | Full-matrix least-squares on F <sup>2</sup>        |          |
| Data / restraints / parameters    | 5782 / 1 / 362                                     |          |
| Goodness-of-fit on F <sup>2</sup> | 1.064                                              |          |
| Final R indices [I > 2σ(I)]       | R1 = 0.0754, wR2 = 0.2166                          |          |
| R indices (all data)              | R1 = 0.0910, wR2 = 0.2322                          |          |
| Absolute structure parameter      | 0.032(11)                                          |          |
| Extinction coefficient            | n/a                                                |          |

Largest diff. peak and hole

1.123 and -0.939 e.Å<sup>-3</sup>
